# Supplementary material for: A single-cell transcriptomic and anatomic atlas of mouse dorsal raphe Pet1 neurons
Source: eLife. 2020 Jun 22;9:e55523. doi: 10.7554/eLife.55523 (PMC7308082; doi:10.7554/eLife.55523)
Supplement: Supplementary file 1. — Column one is the gene symbol, column two is the p-value given by the Wilcoxon Rank Sum test, column three is the average ‘log fold change’ (i.e. log-fold difference in transcript abundance between the in-group and out-group), where a positive value indicates that a gene is expressed at a higher level in a given cluster relative to all other clusters, and a negative value indicates that a gene is expressed at a lower level. Column four is the percent of cells within a particular cluster in which the gene was detected, column five is the percent of cells within all other clusters in which a gene was detected, column six gives the Bonferroni-corrected p-value, and column seven indicates the cluster in which the given gene is a positive or negative marker. Note, not all enriched genes are unique to only one cluster, as more similar clusters will share subsets of enriched genes. The ‘sig_var_genes’ worksheet lists the top two thousand highest ‘standardized variance’ genes, that is genes that vary significantly more than expected based on mean expression. [file elife-55523-supp1.xlsx]

## Sheet: all_subgroup_markers
gene symbol	p_val	avg_logFC	pct.1	pct.2	p_val_adj	cluster
Npas1	7.54614e-120	0.474187	0.47	0.019	1.30027e-115	1
Gabre	3.67565e-76	0.368415	0.83	0.17	6.33352e-72	1
Sema5a	4.66229e-66	0.831712	0.92	0.298	8.0336e-62	1
Gabrq	5.27731e-55	0.618315	0.92	0.331	9.09333e-51	1
Pcdh19	2.27179e-46	0.686732	0.98	0.605	3.91453e-42	1
Unc5d	8.82668e-44	-0.637395	0.14	0.882	1.52092e-39	1
Fam114a1	2.29568e-40	0.294094	0.59	0.131	3.95569e-36	1
Fgf13	1.36736e-39	0.747545	0.98	0.884	2.35611e-35	1
Sox1	4.27813e-38	-0.342959	0.19	0.846	7.37164e-34	1
Cacna1e	1.01915e-36	-0.546823	0.73	0.962	1.75609e-32	1
Tmem158	3.15979e-35	-0.648642	0.94	0.988	5.44463e-31	1
Rgs2	8.13563e-35	-0.828662	0.8	0.96	1.40185e-30	1
Npas3	1.54674e-32	0.31955	0.8	0.393	2.66519e-28	1
Nbl1	5.70131e-32	-0.687864	0.26	0.838	9.82392e-28	1
Wfdc12	1.74855e-31	-0.578463	0.22	0.818	3.01293e-27	1
Bex4	1.90292e-31	-0.50492	1	0.999	3.27892e-27	1
Prkcb	7.88969e-31	0.512064	0.97	0.939	1.35947e-26	1
Pde2a	1.18521e-30	-0.542993	0.87	0.963	2.04223e-26	1
Nell1	1.26027e-30	0.39519	0.81	0.351	2.17157e-26	1
Dlk1	3.32014e-30	1.09478	0.96	0.644	5.72093e-26	1
Rasgrf1	9.77299e-30	0.368234	1	0.997	1.68398e-25	1
Ncam2	1.3112e-29	0.283326	0.68	0.236	2.25934e-25	1
Rbfox1	2.62671e-29	0.39412	0.96	0.761	4.52609e-25	1
Pou3f1	8.33097e-29	0.312296	0.58	0.18	1.43551e-24	1
Dpp10	9.76854e-29	-0.433146	0.73	0.963	1.68322e-24	1
Ap1s2	1.32027e-28	0.284005	0.91	0.491	2.27496e-24	1
Spock3	1.55417e-28	0.491821	0.99	0.98	2.67798e-24	1
Rbms3	2.83028e-28	-0.578045	0.97	0.986	4.87686e-24	1
Thsd7a	3.12643e-28	-0.299221	0.25	0.811	5.38716e-24	1
Zbtb20	8.16541e-28	-0.727176	1	0.987	1.40698e-23	1
Frmpd4	9.34053e-28	-0.394731	0.56	0.896	1.60947e-23	1
Cadm1	1.31945e-27	-0.463473	0.82	0.984	2.27354e-23	1
Dgkk	1.84295e-27	-0.496027	0.85	0.937	3.17559e-23	1
Nsg2	1.07958e-26	-0.356256	0.99	1	1.86022e-22	1
Marc2	1.75148e-26	0.353281	0.97	0.901	3.01797e-22	1
Fjx1	1.77499e-26	0.499826	0.91	0.551	3.05849e-22	1
Fxyd7	2.25924e-26	-0.457722	0.94	0.994	3.89289e-22	1
Cmbl	3.38828e-26	0.278645	0.66	0.24	5.83835e-22	1
Arhgap36	3.45255e-26	0.501333	0.96	0.499	5.94908e-22	1
Nrxn3	3.67378e-26	0.532402	1	0.761	6.33029e-22	1
Alcam	1.13352e-25	0.483953	0.97	0.729	1.95317e-21	1
Frmpd3	1.73144e-25	0.367564	0.98	0.853	2.98345e-21	1
Nnat	1.95674e-25	0.560831	0.99	0.823	3.37166e-21	1
Col25a1	4.83672e-25	-0.725218	0.58	0.9	8.33415e-21	1
Pbx3	5.73476e-25	-0.4178	0.5	0.885	9.88156e-21	1
Mrap2	6.94719e-25	0.388338	1	0.926	1.19707e-20	1
Zfos1	2.2447e-24	0.418434	1	0.992	3.86785e-20	1
Ralyl	2.34059e-24	0.335042	1	0.994	4.03307e-20	1
Sparcl1	4.62091e-24	-0.515176	0.51	0.892	7.9623e-20	1
Tpi1	1.03837e-23	0.325062	1	1	1.78922e-19	1
Pcsk2	1.71945e-23	0.340644	1	0.937	2.96279e-19	1
Chgb	2.08439e-23	0.499231	1	0.999	3.59162e-19	1
Calb2	2.26701e-23	0.838387	0.72	0.307	3.90629e-19	1
Dlgap1	4.65834e-23	0.430997	0.95	0.913	8.02679e-19	1
Lrp1b	7.20789e-23	0.356347	0.99	0.965	1.24199e-18	1
Sez6l	1.38387e-22	-0.377047	0.8	0.945	2.38454e-18	1
Serpine2	1.71101e-22	-0.438938	0.35	0.818	2.94825e-18	1
Ppp1r14c	2.30433e-22	-0.341639	0.7	0.948	3.97058e-18	1
Tmem255a	8.6024e-22	0.418467	1	0.918	1.48228e-17	1
Rhou	1.70606e-21	-0.274163	0.49	0.852	2.93971e-17	1
1810041L15Rik	3.48359e-21	-0.264719	0.33	0.8	6.00258e-17	1
Cacng3	6.46197e-21	-0.324728	0.73	0.899	1.11346e-16	1
Ptprd	9.04628e-21	-0.334778	0.77	0.973	1.55876e-16	1
Rexo2	2.20318e-20	-0.32705	0.99	0.996	3.79631e-16	1
Dpcd	8.06472e-20	-0.266779	0.99	1	1.38963e-15	1
Pbx1	8.20013e-20	-0.432577	0.98	0.994	1.41296e-15	1
Pgm2l1	1.39713e-19	-0.446682	0.98	0.996	2.4074e-15	1
Nptx1	2.03281e-19	-0.251372	0.12	0.604	3.50274e-15	1
Lpar1	2.38534e-19	-0.274903	0.09	0.571	4.11018e-15	1
Auts2	2.73928e-19	-0.3268	0.89	0.977	4.72005e-15	1
Slc6a4	3.54376e-19	-0.293543	1	0.982	6.10624e-15	1
Ppp2r2b	5.02617e-19	-0.295311	1	0.998	8.6606e-15	1
Kit	6.15862e-19	-0.29856	0.09	0.583	1.06119e-14	1
Slitrk4	7.57663e-19	0.305258	0.89	0.77	1.30553e-14	1
Vat1l	1.11452e-18	-0.379188	0.99	0.988	1.92042e-14	1
Kcnq3	1.19773e-18	0.327472	0.99	0.865	2.06381e-14	1
Mctp1	1.29665e-18	-0.454228	0.3	0.733	2.23426e-14	1
Fam3c	1.43379e-18	-0.548808	0.97	0.989	2.47057e-14	1
Btbd11	1.47919e-18	0.296701	0.96	0.883	2.54879e-14	1
Pcsk6	1.916e-18	-0.298127	0.19	0.63	3.30145e-14	1
Tenm2	2.28072e-18	-0.377753	0.64	0.919	3.9299e-14	1
Ildr2	2.90594e-18	-0.285977	0.68	0.927	5.00723e-14	1
Epb41l3	3.63463e-18	-0.261682	0.98	0.994	6.26283e-14	1
Gria1	1.2717e-17	0.250492	0.89	0.695	2.19126e-13	1
Ldha	2.49867e-17	0.334135	1	0.999	4.30545e-13	1
Hpcal4	3.98293e-17	-0.268534	0.87	0.969	6.86299e-13	1
Ddah1	4.83897e-17	-0.319297	0.87	0.954	8.33803e-13	1
Pde1a	5.26305e-17	-0.458141	0.87	0.908	9.06876e-13	1
Gnb4	5.38233e-17	0.268405	0.91	0.69	9.2743e-13	1
Pdyn	6.69421e-17	-0.398148	0.04	0.489	1.15348e-12	1
Stmn4	8.07525e-17	0.348349	0.97	0.952	1.39145e-12	1
Hcrtr1	9.83653e-17	0.328439	0.94	0.691	1.69493e-12	1
Kcnc1	1.36443e-16	-0.280257	0.95	0.989	2.35106e-12	1
Rgs10	1.47122e-16	-0.690186	0.26	0.666	2.53507e-12	1
Sln	3.09826e-16	0.379591	0.44	0.156	5.33861e-12	1
Nxph4	3.26145e-16	0.316817	0.97	0.761	5.6198e-12	1
Myh7	4.2083e-16	-0.318702	0.36	0.728	7.25132e-12	1
Tns1	4.48993e-16	0.270296	0.99	0.943	7.7366e-12	1
Luzp2	5.32622e-16	-0.25178	0.21	0.664	9.17761e-12	1
Dlg2	7.0711e-16	-0.260652	0.83	0.955	1.21842e-11	1
Irs4	8.24944e-16	-0.303764	0.95	0.956	1.42146e-11	1
Nebl	8.93452e-16	0.274551	0.99	0.939	1.53951e-11	1
Tmem114	1.20719e-15	-0.519833	0.56	0.761	2.08011e-11	1
Hs3st4	1.88521e-15	0.300994	0.95	0.521	3.2484e-11	1
Opcml	2.21464e-15	0.280818	0.99	0.989	3.81605e-11	1
1700001L19Rik	3.5974e-15	-0.258804	0.59	0.865	6.19867e-11	1
Lsamp	6.59158e-15	-0.425201	1	0.996	1.13579e-10	1
Ube2e3	8.26839e-15	-0.282312	0.95	0.987	1.42473e-10	1
Rprm	9.14528e-15	-0.501379	0.15	0.549	1.57582e-10	1
Cplx2	1.3252e-14	0.302238	1	0.986	2.28345e-10	1
Prph	1.32956e-14	-0.602507	0.21	0.593	2.29096e-10	1
Pax5	2.01986e-14	-0.261396	0.18	0.596	3.48042e-10	1
Rcan2	2.71114e-14	0.270412	1	0.999	4.67157e-10	1
Amigo2	4.62319e-14	-0.434931	0.64	0.843	7.96621e-10	1
Syt4	4.64767e-14	-0.28879	1	1	8.0084e-10	1
Ret	4.71721e-14	-0.304759	0.05	0.436	8.12822e-10	1
Fstl5	7.14385e-14	-0.321757	0.37	0.706	1.23096e-09	1
Sez6	1.10462e-13	0.259296	1	0.958	1.90337e-09	1
Cacna2d1	1.18545e-13	-0.313355	1	0.999	2.04265e-09	1
Cpne7	1.51041e-13	0.353705	0.92	0.925	2.60259e-09	1
Gnai1	1.99075e-13	-0.307424	1	0.997	3.43026e-09	1
Pam	2.70909e-13	-0.592056	1	0.976	4.66803e-09	1
Crip2	3.6901e-13	-0.321891	0.79	0.951	6.35841e-09	1
Pak3	9.37009e-13	-0.25205	1	0.999	1.61456e-08	1
Maob	1.02427e-12	-0.351725	0.96	0.959	1.76492e-08	1
Ctsl	1.05224e-12	-0.448327	0.98	0.989	1.81311e-08	1
Tph2	1.09091e-12	-0.327049	1	0.995	1.87975e-08	1
Pcdh11x	1.11797e-12	-0.337082	0.04	0.398	1.92638e-08	1
Ppia	1.45611e-12	0.250452	1	1	2.50902e-08	1
Rasgrp1	6.15702e-12	0.272399	0.94	0.812	1.06092e-07	1
Dnajc12	7.85131e-12	0.258419	1	0.996	1.35286e-07	1
Arl6ip5	8.27374e-12	0.253026	0.99	0.981	1.42565e-07	1
Pcp4l1	9.8568e-12	-0.420095	0.17	0.516	1.69843e-07	1
Dad1	2.25912e-11	0.262687	1	0.988	3.89269e-07	1
Cd63	3.13503e-11	0.253818	0.98	0.777	5.40197e-07	1
Adcy2	4.25588e-11	-0.280878	0.4	0.686	7.3333e-07	1
Nxph1	1.26395e-10	-0.350022	0.38	0.696	2.17792e-06	1
Gucy1a3	3.7775e-10	-0.32597	0.96	0.932	6.50901e-06	1
Mgll	5.10902e-10	-0.404244	0.55	0.713	8.80335e-06	1
Slc17a8	2.19502e-09	-0.7473	0.46	0.643	3.78224e-05	1
Gm42418	2.23538e-09	0.295229	1	1	3.85179e-05	1
Gfra1	3.73609e-09	-0.326866	0.96	0.951	6.43766e-05	1
Gpx3	9.19845e-09	-0.271796	0.57	0.791	0.000158499	1
Aldoc	3.19879e-08	-0.296764	1	0.995	0.000551184	1
Cited1	3.32216e-08	-0.503022	0.63	0.776	0.000572441	1
Pcp4	1.4448e-07	-0.374255	0.98	0.998	0.00248953	1
Crip1	3.58468e-06	-0.270651	0.23	0.459	0.0617675	1
Gad1	3.73304e-06	-0.32844	0.1	0.309	0.0643241	1
Crym	2.35216e-163	0.429848	0.753	0.143	4.05301e-159	2
Asb4	2.50972e-144	1.11114	0.989	0.511	4.32451e-140	2
Ntm	8.20133e-123	-0.739878	0.493	0.908	1.41317e-118	2
St8sia2	8.33367e-123	0.430092	0.97	0.534	1.43598e-118	2
Wfdc12	1.92474e-121	0.640443	0.984	0.757	3.31653e-117	2
Prph	1.4265e-115	0.85113	0.959	0.505	2.45801e-111	2
Pou6f2	3.1526e-114	0.351685	0.93	0.382	5.43225e-110	2
Trh	5.74184e-114	0.419878	0.577	0.104	9.89376e-110	2
Clic1	1.10163e-108	0.557993	0.827	0.321	1.89821e-104	2
Prkcq	2.5113e-108	0.440707	0.976	0.46	4.32723e-104	2
S100a16	1.19556e-107	0.44172	0.962	0.685	2.06007e-103	2
Tmem158	2.68232e-104	0.498602	0.997	0.984	4.6219e-100	2
Fam19a2	2.58913e-103	0.392252	0.973	0.47	4.46134e-99	2
Cpne5	1.10906e-102	0.481975	1	0.838	1.91101e-98	2
Pax5	1.99659e-102	0.386041	0.984	0.503	3.44033e-98	2
Myh7	2.41122e-100	0.443305	0.967	0.665	4.15477e-96	2
Crip2	1.19347e-97	0.450598	0.995	0.934	2.05647e-93	2
Nefl	3.52225e-97	-0.659734	0.694	0.921	6.06919e-93	2
Epha5	8.11743e-97	-0.654606	0.572	0.915	1.39872e-92	2
Grin2a	7.28985e-95	-0.334061	0.144	0.739	1.25611e-90	2
Slit2	5.17126e-93	-0.478914	0.136	0.718	8.91059e-89	2
Nsf	7.93604e-92	-0.383761	0.997	0.999	1.36746e-87	2
Gch1	1.14013e-87	0.383708	1	0.969	1.96457e-83	2
Cdh13	1.15818e-87	0.521212	1	0.956	1.99566e-83	2
Tmem176b	3.94024e-87	0.396795	0.992	0.75	6.78942e-83	2
Anks1b	1.21489e-85	-0.429281	0.894	0.978	2.09338e-81	2
Rab3c	1.35882e-85	-0.513707	0.984	0.996	2.34138e-81	2
Ppp3ca	3.83197e-85	-0.404943	0.992	0.999	6.60287e-81	2
Prmt8	1.17416e-84	0.352129	0.992	0.63	2.0232e-80	2
Tmem163	1.22572e-84	0.352857	0.986	0.85	2.11205e-80	2
Tmem176a	1.52466e-84	0.346974	0.984	0.682	2.62713e-80	2
Got1	4.71376e-84	-0.374334	0.995	0.999	8.12229e-80	2
Slc17a8	1.67514e-82	-1.00769	0.209	0.715	2.88643e-78	2
Mgat4c	2.14614e-82	-0.428668	0.886	0.965	3.69801e-78	2
Nrxn3	2.19991e-82	-0.724295	0.436	0.833	3.79066e-78	2
Vsnl1	5.97384e-81	0.517535	1	0.994	1.02935e-76	2
Hspb1	1.3773e-79	0.513602	0.713	0.299	2.37323e-75	2
Psd3	4.12901e-79	-0.394415	0.772	0.933	7.11469e-75	2
Rbms3	1.38925e-78	0.406078	1	0.983	2.39382e-74	2
Ppp1r1a	1.3893e-78	0.322294	1	0.942	2.3939e-74	2
Pam	2.45725e-78	0.590282	1	0.972	4.23408e-74	2
Tenm2	4.00171e-78	0.404032	0.995	0.89	6.89534e-74	2
Fev	2.95682e-77	0.312361	1	1	5.09489e-73	2
Ina	9.50173e-77	-0.34395	1	0.999	1.63724e-72	2
Ptprt	2.60222e-76	0.404614	0.989	0.903	4.48389e-72	2
Cystm1	6.6375e-76	0.308936	0.995	0.997	1.14371e-71	2
Pcbd1	7.96532e-75	0.308022	1	0.982	1.37251e-70	2
Ube2e2	9.96218e-75	0.303972	0.997	0.995	1.71658e-70	2
Snap25	1.61898e-74	-0.25992	1	1	2.78967e-70	2
Nrxn1	3.53354e-74	-0.312077	1	1	6.08864e-70	2
Snca	1.32863e-73	-0.448607	1	0.996	2.28936e-69	2
Pcdh15	6.65545e-72	-0.283122	0.084	0.605	1.1468e-67	2
Pcsk6	8.80761e-72	0.283839	0.965	0.546	1.51764e-67	2
Gucy1a3	3.62324e-71	0.387523	1	0.921	6.24321e-67	2
Rpl10	4.16192e-71	0.256073	1	1	7.17141e-67	2
Cbln2	9.52756e-71	-0.518383	0.062	0.584	1.64169e-66	2
Hs3st4	1.47951e-70	0.37851	0.97	0.459	2.54935e-66	2
Gstm1	1.58791e-70	0.29805	0.989	0.848	2.73613e-66	2
Dnm3	1.33557e-69	-0.315311	0.997	0.999	2.30132e-65	2
Tagln3	6.16321e-69	-0.362595	0.989	0.997	1.06198e-64	2
Thy1	8.3423e-69	-0.395536	0.385	0.804	1.43746e-64	2
Ggct	3.25325e-68	0.309047	0.986	0.928	5.60567e-64	2
Gabrg3	9.1849e-68	-0.28022	0.024	0.539	1.58265e-63	2
Cpe	1.78081e-66	-0.418378	1	1	3.06851e-62	2
Efhd2	3.48105e-66	-0.338385	0.962	0.99	5.9982e-62	2
Cntnap5a	6.19357e-65	-0.284932	0.415	0.811	1.06721e-60	2
Car10	2.76875e-64	0.354407	0.995	0.926	4.77084e-60	2
Ctsz	4.16296e-64	0.40248	0.967	0.798	7.17319e-60	2
Fstl1	5.74653e-64	0.331752	0.995	0.885	9.90184e-60	2
Crip1	2.25709e-63	0.509036	0.772	0.389	3.88919e-59	2
Tenm1	4.96806e-63	-0.335476	0.799	0.948	8.56047e-59	2
Usmg5	6.52035e-63	-0.266769	1	1	1.12352e-58	2
Nefm	9.07936e-62	-0.282269	0.374	0.749	1.56446e-57	2
Ndrg4	1.12981e-61	-0.255111	1	1	1.94678e-57	2
Ly6h	1.25129e-61	0.254803	1	1	2.1561e-57	2
Arhgap24	1.40282e-61	0.27074	0.995	0.89	2.4172e-57	2
Jund	1.54751e-61	0.386132	1	0.999	2.66651e-57	2
Pcdh10	2.83952e-61	-0.497258	0.864	0.928	4.89278e-57	2
Arhgap36	3.77847e-61	0.760765	0.818	0.463	6.51069e-57	2
Mgll	3.37008e-60	-0.525995	0.463	0.751	5.80698e-56	2
Kcnq3	3.69187e-60	-0.363013	0.729	0.897	6.36146e-56	2
Celf2	2.10462e-59	-0.286154	0.71	0.92	3.62646e-55	2
Pcdh7	2.29999e-59	-0.448645	0.385	0.76	3.96311e-55	2
Hspa4l	4.93424e-59	-0.284271	0.997	0.998	8.50219e-55	2
Cdyl2	1.25792e-57	0.344499	0.997	0.942	2.16752e-53	2
Ppp1r14c	1.76807e-57	0.266395	1	0.926	3.04656e-53	2
Wnt5a	8.62486e-57	-0.350857	0.241	0.672	1.48615e-52	2
Ptprz1	9.27664e-57	0.281958	0.976	0.835	1.59846e-52	2
Ajap1	5.76544e-56	0.288723	1	0.985	9.93443e-52	2
Scn1a	2.09365e-55	-0.284072	0.78	0.933	3.60757e-51	2
Pbx1	4.70387e-55	0.298842	1	0.992	8.10523e-51	2
Ubl3	6.58288e-54	-0.274926	0.984	0.986	1.1343e-49	2
Rcan2	2.35646e-53	-0.282067	1	0.999	4.06042e-49	2
Adcy2	2.76954e-53	-0.355361	0.393	0.726	4.7722e-49	2
Cyb5a	4.47031e-53	0.261045	1	0.988	7.70278e-49	2
Phlda1	6.61548e-53	0.314521	0.957	0.77	1.13991e-48	2
Cbln4	7.04848e-53	-0.554197	0.534	0.795	1.21452e-48	2
Slc18a2	2.34661e-52	0.290649	1	0.991	4.04345e-48	2
Atp8a1	8.43022e-52	-0.291694	1	0.998	1.45261e-47	2
Fam3c	1.11955e-51	0.385849	1	0.986	1.92909e-47	2
Rgs17	4.84355e-51	-0.27725	0.995	0.998	8.34593e-47	2
Pcdh19	7.34121e-51	-0.342731	0.312	0.678	1.26496e-46	2
Nr3c1	9.20974e-51	0.285578	1	0.961	1.58693e-46	2
Rasgrf2	1.03012e-49	-0.258755	0.092	0.509	1.775e-45	2
mt-Co1	5.39122e-49	-0.263263	1	1	9.28961e-45	2
Chchd10	2.64648e-48	-0.264575	1	0.999	4.56016e-44	2
Cachd1	3.03421e-48	-0.250271	0.615	0.829	5.22825e-44	2
mt-Nd1	3.91651e-48	-0.301678	1	1	6.74853e-44	2
Syt4	4.20455e-48	-0.311267	1	1	7.24487e-44	2
Psmb2	6.60873e-48	0.352614	0.992	0.981	1.13875e-43	2
mt-Co3	6.67328e-48	-0.269316	1	1	1.14987e-43	2
Chd3os	7.88759e-48	-0.309953	1	0.999	1.35911e-43	2
Ctsl	1.1128e-47	0.383868	1	0.987	1.91747e-43	2
Cadm2	5.70117e-47	-0.407798	0.976	0.964	9.82369e-43	2
Kcnab1	1.86848e-46	-0.309684	0.488	0.74	3.21958e-42	2
Atp5k	2.85906e-46	-0.264866	0.995	0.999	4.92644e-42	2
Nxph1	4.87424e-46	-0.440547	0.401	0.735	8.3988e-42	2
Pcdh11x	7.10114e-46	-0.371926	0.051	0.444	1.2236e-41	2
Rspo3	7.17066e-46	-0.347455	0.024	0.417	1.23558e-41	2
Mctp1	7.7372e-46	-0.455836	0.493	0.756	1.3332e-41	2
Cthrc1	9.35136e-46	0.295852	0.997	0.98	1.61133e-41	2
Zfhx4	1.14664e-45	-0.267839	0.919	0.937	1.97577e-41	2
Vat1l	3.95519e-45	0.26414	1	0.986	6.81518e-41	2
Vwc2	4.66725e-45	0.327338	0.946	0.817	8.04214e-41	2
Utrn	8.03357e-45	-0.292434	0.065	0.452	1.38426e-40	2
Pgm2l1	8.47175e-45	-0.369426	1	0.994	1.45977e-40	2
Raph1	8.5975e-45	-0.271803	0.97	0.984	1.48143e-40	2
Cntn1	1.0928e-44	-0.276368	1	1	1.88301e-40	2
Scn1b	2.23162e-43	-0.281917	0.938	0.978	3.8453e-39	2
Fstl5	2.5195e-43	0.253696	0.94	0.646	4.34135e-39	2
mt-Nd5	5.46121e-43	-0.259661	1	1	9.41021e-39	2
Camk2d	5.42751e-42	-0.346622	0.973	0.983	9.35214e-38	2
Tmem114	5.85632e-42	0.32044	0.973	0.711	1.0091e-37	2
Cntnap2	1.04812e-41	-0.27497	0.976	0.977	1.80602e-37	2
Fxyd7	3.51877e-41	0.266169	1	0.99	6.0632e-37	2
Cplx1	2.75674e-40	-0.306382	0.978	0.958	4.75014e-36	2
Nyap2	1.06466e-39	-0.282476	0.799	0.91	1.83452e-35	2
Gng13	1.09849e-39	-0.275458	0.42	0.719	1.8928e-35	2
Ntng1	4.68528e-39	-0.27645	0.03	0.377	8.07321e-35	2
Zfhx3	9.90534e-39	-0.257931	0.986	0.958	1.70679e-34	2
Spock3	1.19699e-38	-0.463137	0.973	0.982	2.06253e-34	2
Prdx1	1.41715e-38	0.314908	0.997	0.996	2.4419e-34	2
Slc6a17	1.96328e-38	-0.271548	0.957	0.975	3.38292e-34	2
Kcnd2	2.43327e-38	-0.322999	0.864	0.949	4.19277e-34	2
Sparcl1	2.7262e-38	0.324119	0.965	0.86	4.69751e-34	2
Lpar1	9.32015e-38	-0.252842	0.282	0.601	1.60595e-33	2
Arpc1a	1.91653e-37	0.253774	1	0.999	3.30237e-33	2
Adgrl2	2.34088e-37	-0.278845	0.341	0.646	4.03357e-33	2
Pfn1	2.74953e-35	0.25548	1	0.991	4.73771e-31	2
mt-Nd3	3.54898e-35	-0.359895	1	1	6.11524e-31	2
Chn2	2.03834e-32	-0.294793	0.851	0.888	3.51227e-28	2
Gm8730	3.45039e-31	0.455816	0.832	0.705	5.94537e-27	2
Cited1	3.60202e-31	-0.603399	0.637	0.795	6.20664e-27	2
Pcp4l1	6.69284e-31	-0.431212	0.252	0.547	1.15324e-26	2
Calb2	7.75808e-31	-0.631922	0.07	0.372	1.33679e-26	2
Alcam	1.45383e-30	-0.337613	0.596	0.766	2.5051e-26	2
Prkcb	6.45708e-29	-0.286588	0.883	0.951	1.11262e-24	2
Pdyn	1.29412e-28	-0.380363	0.238	0.513	2.22989e-24	2
Rasgrp1	1.25671e-27	-0.403573	0.783	0.824	2.16543e-23	2
Pbx3	2.95548e-27	-0.252586	0.759	0.889	5.09259e-23	2
Plxna4	2.31836e-24	-0.274368	0.772	0.827	3.99476e-20	2
Edil3	7.47166e-24	-0.262508	0.802	0.903	1.28744e-19	2
Rgs10	2.12497e-22	-0.646676	0.553	0.667	3.66153e-18	2
Gfra1	5.03929e-22	-0.312956	0.989	0.944	8.6832e-18	2
Ubb	6.57287e-22	0.328962	1	1	1.13257e-17	2
Plcb4	7.70417e-20	-0.327243	0.976	0.983	1.32751e-15	2
Serpine2	1.64949e-15	-0.278252	0.797	0.798	2.84223e-11	2
Dlk1	3.54694e-10	-0.871871	0.599	0.668	6.11173e-06	2
Pcp4	1.28957e-09	-0.313484	1	0.997	2.22206e-05	2
Calb1	0.00355916	-0.278585	0.832	0.769	1	2
Rgs2	0.00704292	-0.275672	0.995	0.945	1	2
Lsamp	6.62338e-122	-0.833809	0.987	0.998	1.14128e-117	3
Phlda1	4.98532e-112	0.599425	0.997	0.769	8.59021e-108	3
Tmem255a	2.6563e-102	0.544289	1	0.91	4.57708e-98	3
Pitpnc1	3.26161e-98	0.457773	1	0.955	5.62008e-94	3
Aldoc	6.93491e-96	0.527559	1	0.994	1.19495e-91	3
Cplx2	1.0963e-94	0.514232	1	0.985	1.88903e-90	3
Peli2	2.89139e-93	0.27143	0.914	0.378	4.98215e-89	3
Hs3st4	4.25247e-92	0.533624	0.987	0.47	7.32744e-88	3
Kit	1.12858e-86	0.381953	0.955	0.501	1.94466e-82	3
Vwc2	2.92381e-83	-0.446148	0.546	0.882	5.03802e-79	3
Tmem114	1.96486e-82	0.521009	1	0.714	3.38564e-78	3
Crct1	8.72522e-82	0.473778	0.863	0.375	1.50344e-77	3
Hcrtr1	6.03231e-81	0.429086	0.99	0.657	1.03943e-76	3
Prph	1.35438e-80	0.552178	0.984	0.514	2.33374e-76	3
Pde1a	4.02076e-78	0.482281	1	0.892	6.92816e-74	3
Prkcb	2.08201e-73	0.416631	0.994	0.932	3.5875e-69	3
Mgll	2.14087e-71	-0.576689	0.345	0.761	3.68893e-67	3
Robo2	2.34941e-70	0.318215	0.994	0.841	4.04827e-66	3
Luzp2	3.99437e-69	-0.401254	0.224	0.71	6.8827e-65	3
S100a11	4.27259e-69	0.403099	0.99	0.688	7.36211e-65	3
Fam84a	1.81494e-68	0.277208	0.952	0.625	3.12732e-64	3
Lypd1	4.93259e-68	-0.787984	0.716	0.873	8.49934e-64	3
Atp2b1	1.3006e-65	0.312192	1	0.999	2.24106e-61	3
Syt4	4.89642e-64	0.315066	1	1	8.43702e-60	3
Fjx1	2.15232e-63	-0.417289	0.131	0.633	3.70866e-59	3
Pak3	2.00885e-62	0.306537	1	0.999	3.46145e-58	3
Brinp3	8.37299e-62	0.296862	0.981	0.833	1.44275e-57	3
Cadm2	1.42233e-61	0.3756	1	0.961	2.45081e-57	3
Cacng3	7.43365e-61	0.301474	1	0.875	1.28089e-56	3
Slit2	1.15271e-59	-0.431789	0.252	0.684	1.98624e-55	3
Spock1	4.55587e-59	0.313753	0.997	0.872	7.85022e-55	3
Adcy2	5.25163e-59	-0.381416	0.335	0.726	9.04909e-55	3
Rgs10	8.22297e-59	-0.787024	0.297	0.703	1.4169e-54	3
Nxph4	3.74555e-58	0.347572	1	0.735	6.45396e-54	3
Maoa	8.63551e-57	0.256338	1	0.98	1.48798e-52	3
Mmp17	1.32107e-56	-0.271339	0.339	0.722	2.27633e-52	3
Gad2	1.37644e-56	0.506446	0.92	0.548	2.37175e-52	3
Vat1l	1.86035e-56	0.313991	1	0.986	3.20557e-52	3
Vgf	1.92293e-55	0.397702	0.99	0.847	3.31341e-51	3
Cpne8	1.17569e-54	0.28466	0.971	0.764	2.02583e-50	3
Ndrg2	3.21725e-52	0.254606	0.997	0.883	5.54364e-48	3
Cpne4	4.46318e-52	0.260904	0.962	0.591	7.69051e-48	3
Hsph1	4.84923e-52	0.256033	1	0.999	8.3557e-48	3
Cd63	4.94417e-52	0.33575	0.99	0.754	8.5193e-48	3
Slc17a8	1.09784e-51	-0.870638	0.307	0.686	1.8917e-47	3
Podxl2	2.32005e-51	-0.284765	1	1	3.99769e-47	3
Pcdh9	9.16356e-51	0.28366	0.994	0.963	1.57897e-46	3
Sez6	5.3424e-50	0.285385	0.997	0.954	9.20548e-46	3
Prkcq	3.58089e-49	0.266808	0.949	0.478	6.17023e-45	3
Cdyl2	4.19926e-49	0.320707	1	0.944	7.23574e-45	3
Pcp4l1	4.70748e-49	-0.502549	0.125	0.559	8.11146e-45	3
Unc5d	4.79965e-49	0.320393	0.994	0.828	8.27028e-45	3
Dpp10	5.9522e-49	-0.334941	0.927	0.957	1.02562e-44	3
Gstm1	9.03144e-49	0.250327	1	0.85	1.55621e-44	3
Sorcs1	9.79527e-48	-0.359127	0.812	0.888	1.68782e-43	3
Nrxn3	2.07442e-47	-0.601167	0.572	0.802	3.57444e-43	3
Ldha	2.88435e-47	0.288268	1	0.999	4.97002e-43	3
Plxna4	4.28168e-47	-0.35898	0.652	0.844	7.37776e-43	3
Atp2b4	5.22461e-47	0.253871	0.994	0.815	9.00253e-43	3
Pde2a	8.482e-47	0.281162	1	0.953	1.46153e-42	3
Cd47	1.55306e-44	-0.263239	1	1	2.67608e-40	3
Tpd52l1	5.09531e-44	0.255581	0.997	0.979	8.77973e-40	3
Mt1	3.99294e-42	0.294203	0.84	0.533	6.88023e-38	3
Chst1	4.36478e-42	-0.274936	0.751	0.883	7.52096e-38	3
H3f3a	2.07951e-41	-0.284858	0.997	0.994	3.5832e-37	3
Ly6h	1.17377e-40	-0.339373	1	1	2.02253e-36	3
Cpne7	2.03965e-40	0.274813	1	0.913	3.51452e-36	3
Ociad2	9.48735e-40	-0.255876	0.907	0.953	1.63477e-35	3
Pcsk1n	5.77118e-39	-0.346677	1	1	9.94431e-35	3
Wnt5a	2.53523e-37	-0.333754	0.367	0.641	4.36846e-33	3
Tmem158	6.60674e-37	0.260687	1	0.984	1.13841e-32	3
Negr1	7.26933e-37	-0.327748	0.99	0.999	1.25258e-32	3
Cst3	4.66278e-36	-0.355943	0.994	0.999	8.03444e-32	3
Rspo3	6.53101e-34	-0.335633	0.054	0.402	1.12536e-29	3
Pam	7.92266e-34	0.42855	1	0.973	1.36515e-29	3
Cbln4	9.80375e-34	-0.529997	0.645	0.77	1.68928e-29	3
Plcb4	1.60407e-33	-0.394762	0.965	0.985	2.76397e-29	3
Chga	1.06567e-32	-0.374764	0.99	0.981	1.83626e-28	3
Erbb4	1.89131e-30	-0.251507	0.093	0.416	3.25891e-26	3
Pcdh7	2.22377e-30	-0.359616	0.508	0.73	3.83178e-26	3
Ntng1	1.82323e-28	-0.260918	0.054	0.363	3.14161e-24	3
Nxph1	5.1095e-28	-0.404551	0.521	0.708	8.80419e-24	3
Tph2	9.76142e-28	0.251975	1	0.995	1.68199e-23	3
H3f3b	1.2186e-27	-0.285408	1	0.999	2.09977e-23	3
Col25a1	1.77711e-27	-0.508585	0.907	0.883	3.06214e-23	3
Ppia	2.54493e-27	-0.283544	1	1	4.38517e-23	3
Cdh13	2.79239e-26	0.278724	1	0.957	4.81156e-22	3
Resp18	2.56925e-25	-0.514089	1	0.998	4.42707e-21	3
Cacna2d1	3.42743e-24	-0.270781	1	0.999	5.90581e-20	3
Ret	3.91349e-24	-0.282488	0.188	0.455	6.74333e-20	3
Rprm	1.35667e-23	-0.495974	0.361	0.558	2.33767e-19	3
AY036118	2.73675e-21	-0.346402	0.716	0.808	4.7157e-17	3
Gfra1	5.43321e-21	-0.327793	0.997	0.945	9.36196e-17	3
Pcdh11x	1.52795e-20	-0.315752	0.169	0.415	2.63281e-16	3
Calb2	1.03478e-19	-0.608155	0.121	0.355	1.78303e-15	3
Pcp4	1.46496e-19	-0.391747	1	0.997	2.52428e-15	3
Pcdh10	2.05855e-19	-0.348283	0.958	0.912	3.54709e-15	3
Gm42418	4.07496e-19	-0.347484	1	1	7.02157e-15	3
Caly	5.32933e-18	-0.304125	1	0.999	9.18296e-14	3
Kcnd2	6.42925e-18	-0.252416	0.939	0.935	1.10782e-13	3
Tecr	7.60933e-18	-0.257128	1	0.999	1.31116e-13	3
Epha5	1.93415e-16	-0.42125	0.911	0.853	3.33274e-12	3
Nbl1	8.01392e-16	-0.368249	0.837	0.81	1.38088e-11	3
Mctp1	3.07e-15	-0.352688	0.677	0.721	5.28992e-11	3
Fstl5	1.68325e-13	-0.255556	0.681	0.694	2.90042e-09	3
Cited1	4.69941e-13	-0.500842	0.77	0.77	8.09756e-09	3
Peg10	2.45817e-11	-0.282314	0.917	0.885	4.23567e-07	3
Ubb	2.7941e-10	-0.250579	1	1	4.81451e-06	3
Arhgap36	1.08966e-06	-0.282191	0.773	0.48	0.0187759	3
Rasgrp1	8.46651e-06	-0.272182	0.904	0.805	0.145886	3
Xist	3.18098e-05	-0.267028	0.284	0.381	0.548114	3
Asb4	0.00689865	-0.533161	0.652	0.576	1	3
Vim	8.61792e-86	0.436201	0.752	0.151	1.48495e-81	4
Sox14	7.39986e-72	0.294606	0.91	0.28	1.27507e-67	4
Prkcq	2.42096e-71	0.670267	1	0.511	4.17155e-67	4
Peli2	2.28507e-70	0.453934	0.966	0.415	3.9374e-66	4
Hs3st4	3.59267e-68	0.685851	1	0.509	6.19053e-64	4
Fam19a2	4.26356e-68	0.659691	0.993	0.52	7.34654e-64	4
Rbms3	1.48536e-66	0.675772	1	0.985	2.55943e-62	4
Sema6a	6.29423e-60	0.522268	0.993	0.595	1.08456e-55	4
Strip2	7.56945e-59	0.410928	0.979	0.605	1.30429e-54	4
Ntm	4.12682e-55	-0.752698	0.352	0.875	7.11092e-51	4
Bcl11b	1.17484e-52	0.290681	0.834	0.29	2.02437e-48	4
Cdh13	7.52826e-52	0.577196	1	0.96	1.2972e-47	4
Vstm2l	4.77655e-51	0.635361	0.986	0.815	8.23047e-47	4
Tnr	4.67785e-49	0.420934	0.931	0.564	8.0604e-45	4
Cpne4	6.04983e-49	0.49012	0.979	0.618	1.04245e-44	4
Hcrtr1	1.76438e-48	0.570988	0.979	0.683	3.0402e-44	4
Cbln4	1.25714e-47	-0.705598	0.186	0.791	2.16618e-43	4
Cdyl2	3.28998e-46	0.514512	1	0.948	5.66897e-42	4
Prkca	4.08805e-46	0.421035	0.979	0.764	7.04412e-42	4
Dlgap1	1.01409e-42	0.45665	1	0.909	1.74738e-38	4
Rab3c	1.88854e-42	-0.548801	0.979	0.995	3.25414e-38	4
Cited1	2.45409e-42	-0.811528	0.303	0.8	4.22864e-38	4
Slc6a1	6.39907e-41	0.496964	0.986	0.722	1.10262e-36	4
Il1r1	7.30441e-41	0.357396	0.986	0.632	1.25862e-36	4
Slc18a2	1.67838e-40	0.353402	1	0.992	2.89201e-36	4
Ptchd1	2.08396e-40	0.265416	0.862	0.473	3.59087e-36	4
Clstn2	5.90289e-40	0.313202	1	0.854	1.01713e-35	4
Frmpd3	1.19701e-39	0.345323	0.986	0.85	2.06257e-35	4
Cplx2	1.47553e-39	0.443408	1	0.986	2.54249e-35	4
Nyap2	1.77391e-39	-0.429491	0.634	0.909	3.05662e-35	4
Slit2	2.4752e-39	-0.462258	0.062	0.663	4.26501e-35	4
Nxph4	2.69802e-39	0.407398	0.993	0.756	4.64895e-35	4
Tox	4.39986e-39	-0.308612	0.214	0.766	7.58139e-35	4
Htr1b	7.87577e-39	0.366961	1	0.833	1.35707e-34	4
Elmod1	8.25974e-39	-0.469722	0.876	0.994	1.42324e-34	4
Prmt8	5.9149e-38	0.346782	0.986	0.668	1.0192e-33	4
Tmem255a	7.81727e-38	0.493388	1	0.917	1.34699e-33	4
Pclo	1.19093e-37	0.347014	1	0.999	2.05209e-33	4
Pcsk1n	2.55367e-37	-0.503455	1	1	4.40023e-33	4
Gad2	3.67465e-37	0.727392	0.972	0.573	6.3318e-33	4
Gabbr1	4.13206e-37	-0.299979	1	1	7.11995e-33	4
Ptprt	9.14841e-37	0.43134	1	0.911	1.57636e-32	4
Slc24a2	1.24276e-36	-0.32482	0.241	0.76	2.14139e-32	4
Fam84a	1.47942e-35	0.29243	0.979	0.649	2.54919e-31	4
Sdk2	1.91221e-35	0.273068	0.931	0.568	3.29493e-31	4
Rps6ka2	3.73033e-35	0.312342	0.979	0.789	6.42774e-31	4
Brinp3	5.3089e-35	0.428096	0.986	0.844	9.14776e-31	4
Bmpr2	9.7551e-35	0.331365	1	0.993	1.6809e-30	4
Mgll	2.34802e-34	-0.5668	0.303	0.732	4.04588e-30	4
Pam	5.3401e-34	0.43747	1	0.975	9.20153e-30	4
Rnf150	1.98113e-33	0.294281	0.986	0.849	3.41368e-29	4
St8sia2	2.65297e-33	0.350195	0.91	0.582	4.57134e-29	4
Kcnab1	6.02796e-33	-0.362635	0.276	0.728	1.03868e-28	4
Mgat4c	7.91352e-33	-0.410336	0.876	0.957	1.36358e-28	4
Lrp1b	9.17986e-33	0.363143	1	0.964	1.58178e-28	4
Gria4	1.73406e-32	0.35532	1	0.994	2.98797e-28	4
Rgs10	2.91477e-32	-0.784147	0.207	0.678	5.02244e-28	4
Cpne5	1.00653e-31	0.374283	1	0.855	1.73435e-27	4
Kcnn3	1.01947e-31	0.261841	0.952	0.775	1.75665e-27	4
B2m	1.64991e-31	0.301053	0.959	0.761	2.84297e-27	4
Mmp17	2.09225e-31	-0.279788	0.241	0.699	3.60515e-27	4
Lancl3	7.99682e-31	-0.329676	0.455	0.813	1.37793e-26	4
Nxph1	2.03894e-30	-0.490636	0.269	0.71	3.5133e-26	4
C530008M17Rik	2.7452e-30	0.282798	0.993	0.964	4.73025e-26	4
Atp8a1	1.12073e-29	-0.334453	1	0.998	1.93114e-25	4
Scg2	1.36996e-29	-0.346922	1	0.999	2.36057e-25	4
Bean1	4.46627e-29	0.277226	0.945	0.737	7.69582e-25	4
1700001L19Rik	4.4987e-29	-0.300244	0.607	0.87	7.75172e-25	4
Wnt5a	6.65842e-29	-0.37145	0.179	0.633	1.14731e-24	4
Pax5	1.02214e-28	0.299122	0.959	0.553	1.76124e-24	4
Spin2c	2.65915e-28	0.262025	0.979	0.801	4.58197e-24	4
Pcdh7	3.83691e-28	-0.476666	0.359	0.723	6.61139e-24	4
Msi2	3.9167e-28	0.337486	1	0.995	6.74886e-24	4
Kras	5.81459e-28	0.270968	1	0.999	1.00191e-23	4
Galnt13	8.88064e-28	0.257652	0.938	0.708	1.53022e-23	4
Pnmal2	1.14484e-27	-0.311313	1	1	1.97267e-23	4
Dach1	2.30907e-27	0.25743	0.993	0.847	3.97876e-23	4
Manea	3.40124e-27	0.264907	0.993	0.864	5.86068e-23	4
Ntrk3	5.70141e-27	0.296896	1	0.982	9.8241e-23	4
Lsamp	5.7264e-27	-0.499798	1	0.996	9.86716e-23	4
Pcsk6	8.88862e-27	0.2642	0.972	0.588	1.5316e-22	4
Atp2b1	8.89492e-27	0.273107	1	0.999	1.53268e-22	4
Bex4	3.14437e-26	-0.384211	1	0.999	5.41806e-22	4
Ajap1	3.81056e-26	0.305048	1	0.987	6.56598e-22	4
Pcdh15	3.84446e-26	-0.255126	0.083	0.552	6.62439e-22	4
Tmem163	1.23092e-25	0.279098	0.972	0.864	2.12099e-21	4
Tmem176a	4.07046e-25	0.263978	1	0.712	7.0138e-21	4
Ildr2	6.22241e-25	0.290782	0.979	0.912	1.07218e-20	4
Eef2	8.41684e-25	0.253782	1	1	1.4503e-20	4
Adra1b	1.06805e-24	-0.332629	0.979	0.985	1.84036e-20	4
Cyb5a	1.47891e-24	0.266739	1	0.99	2.54831e-20	4
Cachd1	1.61497e-24	-0.264185	0.593	0.809	2.78276e-20	4
Cdh22	1.76146e-24	0.266339	0.903	0.677	3.03518e-20	4
Caln1	2.85416e-24	0.269567	0.428	0.139	4.91801e-20	4
Ank	3.59179e-24	0.258802	1	0.937	6.18901e-20	4
Fjx1	3.61225e-24	-0.378867	0.179	0.592	6.22428e-20	4
Slc17a8	4.68908e-24	-0.921719	0.338	0.655	8.07976e-20	4
Fstl1	5.15308e-24	0.289119	1	0.896	8.87927e-20	4
Tenm2	1.92459e-23	0.292429	1	0.901	3.31626e-19	4
Gabrg3	2.06168e-23	-0.250503	0.048	0.485	3.55249e-19	4
Crtac1	2.97421e-22	-0.335891	0.848	0.897	5.12486e-18	4
Rgs2	3.00639e-22	-0.5872	0.91	0.956	5.18031e-18	4
Pcdh10	3.17781e-22	-0.460097	0.883	0.92	5.47569e-18	4
Ina	8.38365e-22	-0.275575	1	0.999	1.44459e-17	4
Negr1	9.32612e-22	0.294406	1	0.997	1.60698e-17	4
Pdyn	9.98911e-22	-0.400756	0.083	0.495	1.72122e-17	4
Arhgap36	1.33132e-21	0.507382	0.848	0.497	2.294e-17	4
Scn9a	1.38826e-21	0.268661	1	0.951	2.3921e-17	4
Sparcl1	2.14639e-21	0.401765	0.972	0.87	3.69844e-17	4
Maob	3.57948e-21	-0.465864	0.952	0.959	6.1678e-17	4
Asb4	4.1959e-21	0.41292	0.945	0.562	7.22995e-17	4
Faim2	1.47971e-20	-0.271926	1	1	2.54969e-16	4
Ralyl	1.80712e-20	-0.309272	0.986	0.995	3.11385e-16	4
Gpm6b	3.78591e-20	-0.260998	0.428	0.722	6.52349e-16	4
Fxyd6	5.10478e-20	-0.287545	0.993	0.999	8.79604e-16	4
Pbx3	1.35995e-19	-0.330951	0.834	0.871	2.34333e-15	4
Pcdh9	1.5342e-19	0.313224	1	0.965	2.64358e-15	4
Tmem114	2.00405e-19	0.326738	0.972	0.738	3.45318e-15	4
Arpc1a	2.74616e-19	0.296286	1	0.999	4.73191e-15	4
Gucy1a3	3.82054e-19	0.259724	0.993	0.93	6.58317e-15	4
Psd3	6.82844e-19	-0.282347	0.814	0.914	1.17661e-14	4
Fam46a	2.51319e-18	-0.302583	0.145	0.508	4.33048e-14	4
Cacna1e	6.85823e-18	-0.286542	0.917	0.954	1.18174e-13	4
Dlk1	8.53486e-18	0.675986	0.917	0.64	1.47064e-13	4
Ahi1	2.65285e-17	-0.292701	1	1	4.57112e-13	4
Nnat	2.76137e-17	0.348974	0.959	0.822	4.75812e-13	4
Chgb	4.44981e-17	0.299102	1	0.999	7.66747e-13	4
Chd3os	7.39742e-17	-0.264443	1	1	1.27465e-12	4
Psmc5	8.57151e-17	-0.250542	1	0.999	1.47696e-12	4
Gsta4	1.71103e-16	-0.260814	0.407	0.67	2.94827e-12	4
Rasgrp1	1.77914e-16	-0.428004	0.703	0.825	3.06564e-12	4
Pcdh11x	3.0696e-16	-0.336565	0.069	0.403	5.28923e-12	4
Rspo3	3.20242e-16	-0.316598	0.041	0.376	5.51809e-12	4
Zfos1	3.71699e-16	-0.26275	1	0.992	6.40475e-12	4
Gm26917	3.88122e-16	0.270646	0.986	0.93	6.68774e-12	4
Kcnq3	6.62816e-16	-0.283383	0.807	0.874	1.1421e-11	4
Cthrc1	2.35527e-15	0.257545	1	0.981	4.05836e-11	4
Stmn1	2.42488e-15	-0.288689	1	1	4.17831e-11	4
Pitpnc1	2.56333e-15	0.267958	1	0.959	4.41688e-11	4
Gng13	4.40171e-15	-0.255551	0.407	0.689	7.58458e-11	4
Ret	5.91346e-15	-0.297318	0.138	0.438	1.01895e-10	4
Kcnd2	1.6506e-14	-0.2992	0.91	0.937	2.84416e-10	4
Col25a1	1.66613e-14	-0.488472	0.814	0.891	2.87091e-10	4
Abhd11os	2.25436e-14	0.26722	0.786	0.512	3.88449e-10	4
Wfdc12	3.12796e-14	0.364254	0.897	0.785	5.38978e-10	4
Cpe	7.50426e-14	-0.287955	1	1	1.29306e-09	4
Cbln2	1.10029e-13	-0.409657	0.262	0.517	1.89591e-09	4
Necab2	2.34404e-13	-0.344059	1	0.974	4.03902e-09	4
Plcb4	3.26025e-12	-0.336248	0.986	0.982	5.61773e-08	4
Mctp1	4.44187e-12	-0.376752	0.586	0.723	7.65378e-08	4
Calb2	5.26847e-12	-0.590003	0.069	0.341	9.07811e-08	4
Fam3c	1.0431e-11	-0.382693	0.993	0.988	1.79736e-07	4
Nefl	1.35065e-11	-0.335381	0.841	0.888	2.32731e-07	4
Epha5	1.41649e-11	-0.442926	0.841	0.862	2.44075e-07	4
Tecr	3.06225e-09	-0.270676	1	0.999	5.27656e-05	4
Caly	1.35035e-08	-0.294965	1	0.999	0.000232678	4
Cst3	1.62402e-08	-0.259076	1	0.998	0.000279836	4
Pcp4l1	2.34836e-08	-0.384843	0.352	0.511	0.000404645	4
Erdr1	4.15637e-08	-0.281307	0.903	0.95	0.000716185	4
Xist	6.862e-06	-0.316056	0.186	0.38	0.118239	4
Pcp4	4.79929e-05	-0.311102	1	0.997	0.826966	4
Ubb	0.000281991	-0.272179	1	1	1	4
Rprm	0.000282555	-0.39969	0.503	0.534	1	4
Rcan2	0.000845617	0.2942	1	0.999	1	4
Nrxn3	0.00170199	0.260047	0.821	0.768	1	4
Resp18	0.00470664	-0.359205	1	0.998	1	4
Nhsl1	1.20849e-95	0.542927	0.978	0.407	2.08236e-91	5
Chgb	2.28612e-93	-1.47443	0.989	1	3.93921e-89	5
Pdyn	1.43871e-87	0.91407	0.978	0.428	2.47904e-83	5
Ret	3.07439e-86	0.531239	1	0.372	5.29749e-82	5
Serpine2	1.09355e-82	0.774239	1	0.781	1.88429e-78	5
Kif21a	1.06152e-76	0.500356	1	1	1.8291e-72	5
Rprm	7.99807e-75	0.754716	0.994	0.494	1.37815e-70	5
Rgs2	2.09373e-74	0.854095	1	0.949	3.60771e-70	5
Gpm6b	1.29421e-70	0.491333	0.989	0.681	2.23005e-66	5
Col25a1	1.91413e-70	0.789351	1	0.877	3.29824e-66	5
Pbx1	2.29275e-68	0.577614	1	0.993	3.95064e-64	5
Necab2	2.43456e-68	0.645129	1	0.973	4.19499e-64	5
Zbtb20	6.13704e-68	0.658715	1	0.986	1.05747e-63	5
Tmem178	4.09412e-65	0.27824	0.888	0.363	7.05457e-61	5
Tmem28	3.06267e-62	0.336116	0.933	0.437	5.27729e-58	5
Nos1ap	1.70474e-58	0.339155	0.95	0.551	2.93743e-54	5
Lypd1	6.00937e-57	-0.856896	0.453	0.885	1.03548e-52	5
2010300C02Rik	2.75463e-56	0.309412	0.944	0.564	4.7465e-52	5
Plxna2	5.79195e-55	0.405382	0.989	0.91	9.98011e-51	5
Mrap2	2.58839e-54	-0.44505	0.704	0.948	4.46005e-50	5
Nbl1	1.00328e-53	0.536331	0.994	0.798	1.72875e-49	5
Fam3c	3.35533e-53	0.537087	1	0.988	5.78156e-49	5
Nxn	2.40513e-51	0.333036	0.983	0.738	4.14428e-47	5
Bcat1	7.57856e-51	0.460953	1	0.977	1.30586e-46	5
Frmpd4	1.25404e-50	0.380804	1	0.872	2.16084e-46	5
Pgm2l1	2.03096e-49	0.530586	1	0.995	3.49955e-45	5
Mctp1	5.58586e-49	0.509962	0.966	0.694	9.625e-45	5
Kit	2.3568e-48	0.365231	0.966	0.528	4.06101e-44	5
Nos1	1.14418e-46	0.527413	0.581	0.159	1.97154e-42	5
Spock3	2.01411e-46	-0.625584	0.95	0.983	3.47051e-42	5
Scamp1	6.09045e-46	0.323713	1	0.996	1.04945e-41	5
Tox2	9.68016e-45	0.367667	1	0.977	1.66799e-40	5
Gnas	1.0007e-43	0.364474	1	1	1.7243e-39	5
Cygb	4.99801e-43	0.338152	1	1	8.61207e-39	5
Adcy2	1.02942e-42	0.388061	0.955	0.651	1.77379e-38	5
Syt4	2.145e-42	0.340781	1	1	3.69605e-38	5
Amigo2	3.14494e-42	0.529566	0.983	0.822	5.41905e-38	5
Wnt5a	3.97377e-42	0.364185	0.972	0.574	6.84721e-38	5
Cacna1e	9.33296e-42	0.344932	1	0.948	1.60816e-37	5
Tpst1	1.60105e-41	0.261236	0.978	0.785	2.75876e-37	5
Fstl5	1.05291e-40	0.334127	0.983	0.668	1.81427e-36	5
Sez6l	5.90525e-40	0.3322	0.994	0.935	1.01753e-35	5
Cpne4	3.48651e-37	-0.365735	0.207	0.676	6.00761e-33	5
Nsg2	4.90039e-37	0.280084	1	1	8.44387e-33	5
Pde2a	1.59124e-36	0.330298	1	0.956	2.74187e-32	5
Shisa9	5.72535e-36	0.279667	0.966	0.773	9.86534e-32	5
Pcbd2	1.3159e-35	0.281385	1	0.981	2.26743e-31	5
Prune2	1.67252e-35	-0.370286	0.804	0.979	2.88191e-31	5
Hip1r	1.74918e-35	0.250553	0.916	0.665	3.014e-31	5
B4galt6	2.25721e-35	0.294586	1	0.997	3.8894e-31	5
Syndig1l	2.53779e-35	0.264097	0.916	0.525	4.37286e-31	5
Pax5	1.74623e-34	0.285724	0.972	0.546	3.00893e-30	5
Kcnab1	3.85833e-34	0.273832	0.983	0.677	6.64828e-30	5
1700025G04Rik	1.03427e-33	0.289145	0.989	0.968	1.78215e-29	5
Nyap2	1.64248e-33	0.291933	0.994	0.884	2.83015e-29	5
Id4	3.48666e-33	0.300888	1	0.99	6.00786e-29	5
Bend5	4.1497e-33	0.285232	0.978	0.848	7.15034e-29	5
Gabra1	1.80241e-32	-0.346275	0.229	0.646	3.10573e-28	5
Chst1	2.34774e-32	-0.300201	0.642	0.883	4.04539e-28	5
Gpc5	2.40827e-32	0.264618	0.754	0.348	4.14969e-28	5
Vsnl1	3.39814e-32	0.410315	1	0.995	5.85533e-28	5
Rbfox1	5.56962e-32	-0.3349	0.475	0.794	9.59702e-28	5
Exoc4	1.86003e-31	0.257692	0.983	0.919	3.20502e-27	5
Hs3st4	3.76677e-31	-0.51429	0.134	0.573	6.49052e-27	5
Ankrd6	8.01083e-31	0.255961	0.978	0.899	1.38035e-26	5
Vat1l	1.87356e-30	0.323713	1	0.987	3.22834e-26	5
Ubash3b	2.20361e-30	0.252331	0.989	0.881	3.79704e-26	5
Arhgdig	1.14117e-29	0.288823	1	1	1.96634e-25	5
Cntnap2	1.26662e-29	0.29606	1	0.975	2.18251e-25	5
Anxa5	2.1816e-29	0.29272	1	0.921	3.75911e-25	5
Pcdh7	3.98758e-29	0.288373	1	0.676	6.871e-25	5
Raph1	1.48117e-28	0.274682	1	0.98	2.55221e-24	5
Dlgap1	3.23827e-28	-0.314462	0.888	0.917	5.57987e-24	5
Prkcb	3.55884e-28	-0.362544	0.894	0.944	6.13224e-24	5
Pmepa1	1.15444e-27	0.298944	1	0.954	1.98922e-23	5
Sorcs1	2.83535e-27	0.278577	0.994	0.868	4.88559e-23	5
Lsamp	5.95576e-27	0.317509	1	0.996	1.02624e-22	5
Tmem114	6.62329e-27	0.353798	0.983	0.733	1.14126e-22	5
Scn1b	1.14066e-26	-0.297701	0.972	0.972	1.96547e-22	5
Rspo3	5.43415e-26	0.272934	0.704	0.327	9.36358e-22	5
Stmn4	5.87049e-26	-0.270773	0.894	0.958	1.01154e-21	5
Phactr1	9.07873e-26	0.272283	0.966	0.848	1.56436e-21	5
Lancl3	1.48858e-25	0.308537	0.933	0.779	2.56497e-21	5
Vstm2l	6.51614e-25	-0.312968	0.665	0.839	1.1228e-20	5
Fxyd7	1.18726e-24	-0.308656	0.978	0.993	2.04577e-20	5
Ppia	2.9228e-24	-0.347934	1	1	5.03628e-20	5
Maob	3.0703e-24	0.332124	0.989	0.956	5.29043e-20	5
Nnat	5.34264e-24	-0.434723	0.665	0.844	9.20591e-20	5
Ctsl	5.65388e-24	0.336236	1	0.988	9.74221e-20	5
Pcsk1n	5.80827e-24	0.320743	1	1	1.00082e-19	5
Gfra1	5.89006e-24	0.317886	1	0.947	1.01492e-19	5
Sema6a	8.47677e-24	-0.259125	0.341	0.643	1.46063e-19	5
Nefl	7.923e-23	-0.444213	0.816	0.891	1.36521e-18	5
Slc6a4	4.7122e-22	0.251695	1	0.981	8.11958e-18	5
Stmn3	5.05157e-22	-0.270633	1	1	8.70436e-18	5
Crip1	2.24995e-21	0.341477	0.726	0.427	3.87689e-17	5
Fjx1	3.61935e-20	-0.342619	0.318	0.587	6.2365e-16	5
Mif	8.53158e-20	-0.253519	1	0.998	1.47008e-15	5
Suclg1	1.42208e-19	-0.262867	0.95	0.986	2.45039e-15	5
Thy1	1.84222e-19	-0.308881	0.553	0.754	3.17432e-15	5
Caly	5.85487e-19	-0.361476	0.994	1	1.00885e-14	5
Sparcl1	2.09361e-18	-0.37355	0.804	0.882	3.6075e-14	5
Rgs10	2.41261e-18	0.289141	0.894	0.629	4.15717e-14	5
Myl6	1.2869e-17	-0.261966	1	1	2.21746e-13	5
Slc6a1	1.84854e-17	-0.272718	0.536	0.754	3.18523e-13	5
Uqcrb	4.74781e-17	-0.268587	0.994	0.998	8.18096e-13	5
Pcdh19	6.85273e-17	-0.289554	0.385	0.64	1.18079e-12	5
Cxcl14	1.65981e-16	-0.302908	0.061	0.359	2.86002e-12	5
Slc17a8	1.1936e-15	-0.609264	0.419	0.653	2.0567e-11	5
Ptprt	1.26173e-15	-0.276416	0.86	0.921	2.17409e-11	5
Hcrtr1	9.25687e-15	-0.318451	0.603	0.709	1.59505e-10	5
Cd63	1.0623e-14	-0.290319	0.659	0.796	1.83045e-10	5
Ubb	1.26257e-14	-0.360947	1	1	2.17554e-10	5
Tecr	3.6518e-14	-0.290605	1	0.999	6.29242e-10	5
Camk2d	1.65499e-13	-0.276424	0.994	0.981	2.85171e-09	5
Vgf	1.07898e-12	-0.430749	0.782	0.873	1.85918e-08	5
Crct1	1.0902e-12	-0.268652	0.223	0.458	1.87853e-08	5
Tubb2a	1.38748e-12	-0.270083	0.994	1	2.39077e-08	5
AY036118	3.56096e-11	-0.370726	0.704	0.803	6.13589e-07	5
Cbln2	4.45159e-11	-0.357365	0.33	0.516	7.67054e-07	5
Prkcq	8.9582e-09	-0.282958	0.453	0.548	0.000154359	5
Arhgap36	1.00016e-08	-0.529293	0.363	0.532	0.000172338	5
Resp18	1.77095e-08	-0.423519	1	0.998	0.000305152	5
Dlk1	3.89754e-08	-0.927341	0.553	0.666	0.000671584	5
Gm42418	3.49471e-06	-0.27826	1	1	0.0602173	5
Exosc2	8.25976e-06	0.2702	0.782	0.656	0.142324	5
Nxph1	0.00239952	-0.274853	0.737	0.678	1	5
Calb2	0.0038981	-0.545388	0.268	0.329	1	5
Pou3f2	4.75483e-154	0.537646	0.929	0.14	8.19306e-150	6
Emilin2	1.7341e-108	0.503009	0.899	0.229	2.98803e-104	6
Ret	1.58224e-99	0.780856	0.982	0.376	2.72635e-95	6
RP23-291B1.2	6.06272e-89	0.412795	0.881	0.219	1.04467e-84	6
Bcl11a	8.91926e-87	0.496809	0.946	0.353	1.53688e-82	6
Amigo2	6.05379e-84	0.962455	0.994	0.822	1.04313e-79	6
Necab1	5.79097e-83	0.511003	0.667	0.125	9.97842e-79	6
Fam3c	5.41153e-68	0.758739	1	0.988	9.3246e-64	6
Sorcs1	4.58098e-66	0.527288	1	0.868	7.89348e-62	6
Zbtb20	3.17292e-64	0.654708	1	0.986	5.46725e-60	6
Erbb4	8.02366e-64	0.381255	0.923	0.331	1.38256e-59	6
Fam163b	1.31105e-63	0.445028	0.946	0.555	2.25907e-59	6
Necab2	5.8849e-59	0.637573	1	0.973	1.01403e-54	6
Ctsl	5.6116e-58	0.860729	1	0.988	9.66934e-54	6
Gad1	1.70114e-57	0.760938	0.774	0.264	2.93123e-53	6
Id4	3.06876e-56	0.470154	1	0.99	5.28778e-52	6
Diras2	2.41022e-55	0.442591	0.988	0.87	4.15305e-51	6
Cygb	6.87784e-55	0.430184	1	1	1.18512e-50	6
Pcnx	3.53612e-54	0.355831	0.994	0.947	6.09308e-50	6
Asb4	9.30231e-54	0.89258	0.982	0.555	1.60288e-49	6
Gfra1	2.31206e-53	0.562843	1	0.948	3.98391e-49	6
Sphkap	8.87047e-53	0.408224	0.958	0.619	1.52847e-48	6
Serpini1	2.38692e-52	0.637705	0.982	0.924	4.11289e-48	6
Opcml	4.58594e-52	-0.617283	0.958	0.991	7.90203e-48	6
Tmsb4x	8.79766e-52	-0.48488	1	1	1.51592e-47	6
Pcdh7	1.0531e-51	0.502208	1	0.678	1.81459e-47	6
Adra1b	1.6627e-51	0.411832	1	0.983	2.86499e-47	6
Plxna4	1.72464e-51	0.452213	0.994	0.805	2.97173e-47	6
Fut9	2.24807e-51	0.454866	1	0.989	3.87365e-47	6
Rprm	2.26028e-50	0.564948	0.958	0.499	3.89468e-46	6
Id2	1.93764e-49	0.347798	0.774	0.31	3.33876e-45	6
Cd63	2.6103e-48	-0.522277	0.28	0.824	4.49781e-44	6
Rasgrp1	3.64284e-48	0.582943	0.976	0.806	6.27697e-44	6
Pcdh10	2.43749e-47	0.505447	0.994	0.912	4.20003e-43	6
Col25a1	3.30316e-46	0.501949	1	0.877	5.69167e-42	6
Chga	8.05652e-45	0.459587	1	0.981	1.38822e-40	6
Tpst1	2.87318e-44	0.318135	0.964	0.787	4.95078e-40	6
Kcnab1	1.01067e-43	0.359477	1	0.677	1.74149e-39	6
Exoc4	1.36157e-43	0.351295	0.982	0.919	2.34613e-39	6
Lsamp	3.8864e-43	0.421776	1	0.996	6.69665e-39	6
B3galt1	6.1575e-43	0.308613	0.958	0.702	1.061e-38	6
Gucy1a3	9.89202e-42	0.457399	1	0.929	1.70449e-37	6
Cd24a	4.25467e-41	0.264519	0.768	0.29	7.33122e-37	6
Cbln4	4.91157e-41	0.546594	0.976	0.736	8.46313e-37	6
Trp53i11	5.61803e-40	0.291693	0.917	0.682	9.68042e-36	6
Pcp4l1	1.17294e-39	0.347139	0.917	0.469	2.0211e-35	6
Syndig1l	5.806e-39	0.402102	0.839	0.533	1.00043e-34	6
Hpcal1	1.53032e-38	-0.428227	0.869	0.962	2.6369e-34	6
Gria1	1.59111e-38	-0.262435	0.226	0.74	2.74164e-34	6
Gabbr1	4.28874e-38	0.276249	1	1	7.38993e-34	6
Fstl5	4.73551e-38	0.339329	0.976	0.67	8.15976e-34	6
Tox	4.77411e-38	0.308028	0.952	0.714	8.22626e-34	6
Cacna2d2	6.57739e-38	0.343486	0.982	0.941	1.13335e-33	6
Lrpap1	6.86425e-38	0.334036	1	0.996	1.18278e-33	6
Robo1	1.78171e-37	0.263636	0.982	0.725	3.07006e-33	6
Mmp17	2.33242e-37	0.309391	0.946	0.649	4.01899e-33	6
Plcl1	3.21923e-37	0.334349	0.988	0.928	5.54706e-33	6
Ptprm	4.65942e-37	0.314143	1	0.916	8.02864e-33	6
Nyap2	1.05016e-36	0.360402	0.994	0.885	1.80954e-32	6
Cdh13	1.19338e-36	0.449359	1	0.96	2.05631e-32	6
Phlda1	1.79947e-36	-0.45531	0.446	0.826	3.10067e-32	6
Htr1a	1.83174e-36	0.326185	0.994	0.911	3.15628e-32	6
Nptx1	2.17403e-36	0.332545	0.893	0.56	3.74607e-32	6
Cacna2d1	3.77509e-36	0.36991	1	0.999	6.50486e-32	6
Sema6a	2.71985e-35	-0.297825	0.161	0.655	4.68657e-31	6
Nbl1	2.80146e-35	0.450764	0.988	0.8	4.8272e-31	6
Calb1	1.35238e-34	0.575886	0.917	0.769	2.33029e-30	6
Car10	2.25838e-34	0.338924	0.994	0.933	3.89142e-30	6
Dgkk	3.64854e-34	0.393189	1	0.929	6.2868e-30	6
Lancl3	5.56447e-34	0.346197	0.94	0.779	9.58815e-30	6
Edil3	1.71214e-33	0.36829	0.988	0.879	2.95019e-29	6
Gata2	1.74296e-33	0.313193	0.994	0.96	3.0033e-29	6
S100a11	6.99954e-33	-0.393817	0.399	0.753	1.20609e-28	6
Ntrk3	1.27764e-32	0.307192	1	0.982	2.2015e-28	6
Pcdh19	2.36421e-31	-0.347062	0.179	0.655	4.07377e-27	6
Pbx1	3.45371e-31	0.322733	1	0.993	5.95109e-27	6
Calcr	6.27739e-31	0.310497	0.714	0.291	1.08166e-26	6
Ptma	1.92035e-30	-0.306815	1	1	3.30896e-26	6
1700025G04Rik	1.18926e-29	0.278317	0.994	0.968	2.04921e-25	6
Prkca	3.15445e-29	-0.253348	0.464	0.801	5.43543e-25	6
Vwc2	4.02877e-29	0.310519	0.982	0.826	6.94197e-25	6
Hs3st4	5.88532e-29	-0.512752	0.131	0.571	1.0141e-24	6
Vgf	1.09609e-28	-0.573449	0.702	0.879	1.88867e-24	6
Ajap1	2.01368e-28	0.2912	1	0.987	3.46978e-24	6
Ube2ql1	2.63253e-28	0.286449	1	0.985	4.53611e-24	6
Nwd2	3.84316e-28	0.30255	0.976	0.914	6.62215e-24	6
Tmem50b	6.03722e-28	0.254358	0.982	0.97	1.04027e-23	6
Frmpd3	9.81029e-28	-0.28942	0.619	0.877	1.69041e-23	6
Unc5d	1.5982e-27	-0.371123	0.679	0.863	2.75386e-23	6
Ifi27	4.92849e-27	0.280374	0.732	0.363	8.49229e-23	6
Myh7	2.14701e-26	0.275686	0.952	0.694	3.69952e-22	6
Nefl	2.50156e-26	-0.483119	0.726	0.898	4.31044e-22	6
Ache	3.81217e-26	0.252526	1	0.996	6.56874e-22	6
Ptprz1	3.84552e-26	0.272853	0.988	0.847	6.62622e-22	6
Pde2a	5.81479e-26	0.301398	1	0.956	1.00195e-21	6
Serp2	1.27735e-25	-0.28214	1	0.999	2.201e-21	6
Rgs10	3.35516e-25	0.513839	0.917	0.628	5.78127e-21	6
Cbln2	4.79865e-25	-0.466092	0.137	0.53	8.26855e-21	6
En1	8.88864e-25	0.266703	1	0.996	1.5316e-20	6
Cpne5	1.30753e-24	0.312504	0.976	0.855	2.25301e-20	6
Pdyn	1.50517e-24	0.328307	0.798	0.445	2.59356e-20	6
Dlk1	2.74602e-24	0.547432	0.911	0.638	4.73166e-20	6
mt-Nd1	4.09555e-24	0.288269	1	1	7.05705e-20	6
Nrxn3	1.14902e-23	0.369469	0.982	0.755	1.97988e-19	6
Spock3	1.48169e-23	-0.492004	0.982	0.98	2.55309e-19	6
Ubl3	1.7572e-23	-0.251505	0.97	0.987	3.02783e-19	6
Vsnl1	4.11268e-23	0.353726	1	0.995	7.08657e-19	6
Slc6a4	2.71245e-22	0.268561	1	0.981	4.67382e-18	6
Ddah1	6.56682e-22	-0.283424	0.94	0.951	1.13153e-17	6
Gabra1	1.10188e-21	-0.27719	0.256	0.642	1.89865e-17	6
Dpp10	2.43532e-21	0.264579	0.994	0.95	4.19631e-17	6
Maob	9.28761e-21	0.293138	0.994	0.956	1.60035e-16	6
Pmepa1	1.13407e-20	0.271416	0.976	0.956	1.95412e-16	6
Gad2	5.37067e-18	0.303597	0.893	0.575	9.25421e-14	6
Crct1	1.12473e-16	-0.288503	0.149	0.462	1.93802e-12	6
Prkcb	7.39489e-16	-0.282623	0.935	0.94	1.27421e-11	6
Gnai1	1.95948e-15	-0.263596	1	0.997	3.37638e-11	6
Pam	9.09581e-15	0.269523	1	0.975	1.5673e-10	6
Snca	1.17377e-14	-0.273895	0.994	0.997	2.02253e-10	6
Cpne4	1.29015e-14	-0.251787	0.446	0.655	2.22307e-10	6
Lypd1	3.1483e-14	-0.388868	0.72	0.862	5.42483e-10	6
Fos	1.24795e-13	-0.282769	0.732	0.9	2.15034e-09	6
Jund	1.27388e-12	-0.273769	1	1	2.19503e-08	6
Sncg	2.4839e-12	0.258053	1	0.936	4.28e-08	6
Nnat	4.29504e-12	-0.320019	0.696	0.841	7.40078e-08	6
Chgb	9.09879e-11	-0.339007	1	0.999	1.56781e-06	6
Sparcl1	2.23037e-10	-0.284289	0.804	0.882	3.84315e-06	6
Cxcl14	9.19637e-10	-0.27456	0.131	0.352	1.58463e-05	6
Tmem255a	2.58846e-09	-0.26896	0.97	0.918	4.46018e-05	6
Arhgap36	3.6384e-09	0.537659	0.673	0.507	6.26933e-05	6
Ntm	4.97329e-07	-0.253643	0.911	0.838	0.00856948	6
Slc17a8	4.25061e-06	-0.57617	0.637	0.635	0.0732423	6
Cited1	9.6978e-05	-0.451331	0.792	0.768	1	6
Xist	0.000152745	-0.330285	0.262	0.377	1	6
Prph	0.000757911	-0.328595	0.518	0.581	1	6
Calb2	0.00256638	-0.482389	0.232	0.331	1	6
Tmeff2	1.58323e-71	0.420896	0.951	0.265	2.72806e-67	7
Calb2	2.06399e-58	0.99702	0.91	0.292	3.55646e-54	7
Foxp1	6.24111e-57	0.522124	1	0.764	1.07541e-52	7
Vsnl1	2.74019e-50	-1.40641	0.992	0.996	4.72162e-46	7
Cygb	8.57143e-50	-0.592507	1	1	1.47694e-45	7
Adcy2	6.83602e-47	0.494728	0.992	0.657	1.17792e-42	7
Npy2r	6.68508e-46	0.357177	0.885	0.333	1.15191e-41	7
Nrp2	3.70414e-41	0.262764	0.754	0.231	6.3826e-37	7
Utrn	9.22538e-41	0.337216	0.902	0.363	1.58962e-36	7
Rasgrp1	3.03952e-39	0.588888	0.984	0.809	5.23741e-35	7
Nefl	1.74783e-38	0.513102	1	0.879	3.01168e-34	7
Wscd1	2.98285e-38	0.284907	0.943	0.483	5.13974e-34	7
Pantr1	5.24653e-38	-0.388255	0.115	0.728	9.04029e-34	7
Fjx1	3.9405e-36	0.425387	0.992	0.543	6.78988e-32	7
Irs4	9.24275e-36	0.420415	1	0.953	1.59262e-31	7
Nell2	1.04158e-34	0.379258	0.984	0.741	1.79474e-30	7
Lpar1	1.42219e-34	0.274289	0.959	0.528	2.45057e-30	7
Rps6ka3	3.03725e-33	0.290511	0.975	0.582	5.23349e-29	7
Rgs10	4.37333e-32	0.603598	0.975	0.631	7.53568e-28	7
Cadm1	1.20039e-30	0.421455	1	0.976	2.06838e-26	7
Snca	1.7903e-30	0.38898	1	0.996	3.08486e-26	7
Slc1a2	2.36877e-30	0.256421	0.779	0.323	4.08163e-26	7
Pax5	7.01374e-30	-0.365552	0.041	0.608	1.20854e-25	7
Kcnab1	1.68499e-29	0.342213	0.984	0.684	2.90341e-25	7
1700001L19Rik	2.04838e-28	0.323255	0.992	0.846	3.52956e-24	7
Slit2	1.40065e-27	0.332663	0.992	0.606	2.41346e-23	7
Pcsk5	1.77467e-27	0.279062	0.984	0.805	3.05793e-23	7
Lsamp	2.80017e-27	0.372002	1	0.996	4.82497e-23	7
Gpx3	7.4387e-27	0.437838	0.975	0.771	1.28176e-22	7
Ptprt	1.61548e-26	-0.468718	0.787	0.924	2.78363e-22	7
Gad2	1.67356e-26	-0.733325	0.148	0.622	2.88372e-22	7
Anks1b	2.3883e-26	0.32941	1	0.963	4.11529e-22	7
Fgf1	1.08067e-25	0.264185	0.951	0.552	1.8621e-21	7
Ntm	1.23224e-25	0.389445	1	0.834	2.12327e-21	7
Nwd2	1.26049e-25	0.349618	0.984	0.915	2.17195e-21	7
Tmem158	1.46975e-25	-0.467055	0.992	0.986	2.53252e-21	7
Kit	6.36891e-25	-0.324981	0.09	0.588	1.09743e-20	7
Nrxn3	8.21638e-25	0.498944	0.967	0.76	1.41576e-20	7
Mrap2	1.1342e-24	0.282464	0.992	0.926	1.95434e-20	7
Prmt8	3.05079e-24	-0.360718	0.369	0.705	5.25682e-20	7
Bex4	6.23002e-24	0.302316	1	0.999	1.0735e-19	7
Fam19a2	1.12489e-23	-0.373964	0.107	0.574	1.9383e-19	7
Pea15a	1.12637e-23	0.2844	1	0.999	1.94085e-19	7
Alcam	4.62524e-23	0.387602	0.967	0.727	7.96976e-19	7
Tpbg	8.20673e-23	0.252672	0.574	0.198	1.4141e-18	7
Psd3	1.08619e-22	0.330166	1	0.903	1.87162e-18	7
Spock3	1.12217e-22	0.336658	1	0.979	1.93361e-18	7
Gsta4	1.40889e-22	0.407276	0.918	0.639	2.42765e-18	7
Pmepa1	4.1621e-22	-0.358305	0.918	0.96	7.17171e-18	7
Hs3st4	5.95275e-22	-0.52526	0.131	0.561	1.02572e-17	7
Dlg2	6.23511e-22	0.260668	1	0.947	1.07437e-17	7
Arhgap36	6.96376e-22	-0.765453	0.09	0.542	1.19993e-17	7
Pcsk6	1.04567e-21	-0.312789	0.27	0.63	1.80179e-17	7
Lypd1	1.45961e-21	0.340749	1	0.844	2.51506e-17	7
Chgb	1.46658e-21	0.412337	1	0.999	2.52706e-17	7
Tmem114	2.23103e-21	-0.572389	0.615	0.76	3.84428e-17	7
Cited1	3.20907e-21	0.414536	0.975	0.759	5.52954e-17	7
Ntrk3	9.03952e-21	-0.320471	0.992	0.983	1.5576e-16	7
Arhgap24	1.01772e-20	-0.259993	0.869	0.909	1.75363e-16	7
Pbx1	1.18547e-20	-0.40883	1	0.993	2.04268e-16	7
Mal2	1.83646e-20	0.262718	1	0.981	3.16441e-16	7
Asb4	2.22565e-20	-1.01725	0.23	0.605	3.83502e-16	7
Robo2	6.38886e-20	-0.281438	0.754	0.867	1.10086e-15	7
En2	6.74101e-20	-0.252632	0.541	0.763	1.16154e-15	7
Fam46a	8.12556e-20	0.258196	0.836	0.467	1.40012e-15	7
Fgfr1	1.5386e-19	-0.263461	0.861	0.909	2.65117e-15	7
Gpm6b	2.44228e-19	-0.275717	0.418	0.72	4.20829e-15	7
Prph	9.77769e-19	-0.664332	0.246	0.595	1.68479e-14	7
Celf2	1.58849e-18	0.253143	0.984	0.882	2.73713e-14	7
Mgll	2.82141e-18	0.253622	1	0.69	4.86157e-14	7
Prkcq	3.82935e-18	-0.388478	0.213	0.559	6.59835e-14	7
Nxph4	5.46476e-18	-0.401799	0.713	0.773	9.41632e-14	7
Kif21a	9.92559e-18	-0.271918	1	1	1.71028e-13	7
Fstl5	5.21e-17	-0.335783	0.41	0.707	8.97736e-13	7
Slc6a1	6.38739e-17	-0.320465	0.533	0.749	1.10061e-12	7
Stmn1	2.04628e-16	0.333427	1	1	3.52595e-12	7
Cst3	2.5099e-16	0.433728	1	0.998	4.3248e-12	7
Chn2	2.52716e-16	0.292051	0.984	0.877	4.35455e-12	7
Plcb4	4.62465e-16	-0.394921	0.967	0.983	7.96874e-12	7
Khdrbs3	1.12633e-15	-0.268202	0.943	0.972	1.94077e-11	7
Tph2	4.05379e-15	0.277931	1	0.995	6.98509e-11	7
Cpne4	2.32312e-14	-0.263294	0.361	0.655	4.00297e-10	7
Aldoc	2.34955e-14	-0.364901	1	0.995	4.04851e-10	7
Hcrtr1	2.78007e-14	-0.351529	0.533	0.711	4.79033e-10	7
Marcksl1	3.05885e-14	-0.314659	0.475	0.77	5.27071e-10	7
Tcf4	1.04346e-13	-0.265661	0.598	0.768	1.79798e-09	7
Ctsz	1.05534e-13	-0.291436	0.656	0.833	1.81845e-09	7
Car10	3.74784e-13	-0.291318	0.934	0.937	6.45791e-09	7
Chga	4.26204e-13	0.308645	1	0.982	7.34392e-09	7
Serpini1	4.86911e-13	-0.289824	0.91	0.929	8.38996e-09	7
Rbms3	1.00168e-12	-0.344753	0.992	0.985	1.726e-08	7
Phlda1	1.60558e-11	-0.341953	0.73	0.803	2.76658e-07	7
Cpne7	2.6661e-11	-0.275723	0.992	0.921	4.59395e-07	7
Tenm2	2.63645e-10	-0.253486	0.918	0.906	4.54287e-06	7
Crip1	3.10963e-10	-0.330617	0.213	0.462	5.35821e-06	7
Cpe	5.78011e-10	0.27831	1	1	9.95971e-06	7
Cpne5	2.15529e-09	-0.292791	0.852	0.864	3.71379e-05	7
Fgf13	2.23893e-09	-0.279839	0.869	0.889	3.8579e-05	7
Gad1	2.54139e-09	-0.412659	0.074	0.313	4.37907e-05	7
Pam	9.35943e-09	-0.46313	1	0.975	0.000161272	7
Cdyl2	2.73e-08	-0.253444	0.984	0.949	0.000470406	7
Sparcl1	3.22563e-07	-0.29803	0.877	0.876	0.00555809	7
Nbl1	7.62646e-07	-0.331082	0.82	0.813	0.0131412	7
Fam3c	1.76368e-06	-0.327033	1	0.988	0.0303899	7
Gm42418	2.18921e-06	-0.278621	1	1	0.0377222	7
AY036118	1.10397e-05	-0.283986	0.713	0.8	0.190225	7
Cdh13	1.12045e-05	-0.315992	1	0.961	0.193064	7
Dlk1	0.00044449	-0.62391	0.598	0.661	1	7
Rprm	0.000783594	-0.278702	0.434	0.537	1	7
Amigo2	0.000965477	-0.268272	0.861	0.833	1	7
Rorb	2.4233e-71	0.967556	0.953	0.264	4.17558e-67	8
Nr2f2	2.91693e-59	0.591893	0.942	0.238	5.02617e-55	8
Cmbl	1.10881e-49	0.44969	0.86	0.235	1.91059e-45	8
Wnt4	1.49598e-45	0.529421	0.814	0.262	2.57773e-41	8
Slc1a2	2.06287e-37	0.338917	0.907	0.325	3.55453e-33	8
Pvrl1	2.42576e-35	0.28083	0.93	0.394	4.17982e-31	8
Cdh13	1.6592e-34	-0.961692	0.733	0.971	2.85897e-30	8
Pcdh19	6.49456e-34	0.545083	0.988	0.607	1.11908e-29	8
C530008M17Rik	1.11232e-33	-0.459648	0.791	0.972	1.91664e-29	8
Bcat1	6.15462e-31	-0.451125	0.86	0.983	1.0605e-26	8
Efr3b	1.03662e-30	0.452076	0.988	0.895	1.78619e-26	8
Spock3	5.26662e-30	0.57369	1	0.98	9.07491e-26	8
En2	1.72055e-29	-0.342105	0.151	0.775	2.96468e-25	8
Serpine2	2.29275e-29	-0.531088	0.244	0.819	3.95064e-25	8
Cthrc1	6.73989e-29	-0.586548	1	0.982	1.16135e-24	8
Robo1	7.7799e-29	-0.31832	0.116	0.767	1.34056e-24	8
Gnas	9.05991e-29	-0.569295	1	1	1.56111e-24	8
Tshz2	1.31991e-28	0.288597	0.919	0.391	2.27434e-24	8
Cpne9	3.75038e-28	0.259456	0.919	0.436	6.46228e-24	8
C1ql1	1.06025e-27	0.497254	0.349	0.057	1.82692e-23	8
Mpped2	1.40129e-27	-0.273411	0.209	0.799	2.41456e-23	8
Pcdh7	1.6767e-27	-0.554603	0.093	0.724	2.88911e-23	8
Plxna4	1.78373e-27	-0.432026	0.302	0.838	3.07355e-23	8
Efhd2	7.59935e-27	0.410367	1	0.985	1.30944e-22	8
Pde1a	1.44549e-26	-0.639394	0.791	0.911	2.49072e-22	8
Kcnq3	2.00535e-26	0.43679	0.988	0.866	3.45542e-22	8
Atp1b2	3.84334e-26	0.301732	0.977	0.675	6.62246e-22	8
Auts2	7.24114e-26	-0.416974	0.965	0.973	1.24772e-21	8
Nefl	6.13553e-25	0.593947	0.977	0.882	1.05721e-20	8
Mgll	9.07768e-25	0.477871	1	0.695	1.56417e-20	8
Pbx3	1.16729e-24	-0.435882	0.488	0.883	2.01136e-20	8
Sln	5.83908e-24	0.461241	0.547	0.154	1.00613e-19	8
Prune2	6.24269e-24	0.437071	1	0.964	1.07568e-19	8
Ajap1	1.32545e-23	-0.452371	1	0.987	2.28388e-19	8
Nrip3	3.23231e-23	0.446283	0.988	0.917	5.5696e-19	8
Prmt8	3.36909e-23	-0.396178	0.186	0.706	5.80528e-19	8
Marcks	1.03663e-22	-0.396766	0.977	0.998	1.78621e-18	8
Calb1	1.91546e-22	-0.629885	0.407	0.793	3.30052e-18	8
Sphkap	3.65912e-22	-0.336147	0.105	0.664	6.30503e-18	8
Ntm	1.29832e-21	0.433691	1	0.837	2.23713e-17	8
Gucy1a3	1.37057e-21	-0.539501	0.826	0.938	2.36162e-17	8
Avpi1	2.05701e-21	0.327933	0.942	0.808	3.54443e-17	8
Pax5	4.41431e-21	-0.360948	0.047	0.598	7.60629e-17	8
Sez6l	7.774e-21	-0.378044	0.953	0.939	1.33954e-16	8
Tmem158	1.55717e-20	-0.502992	0.942	0.988	2.68316e-16	8
Clcn5	1.87965e-20	0.317245	1	0.953	3.23882e-16	8
Fut9	3.12401e-20	-0.424369	0.977	0.99	5.38298e-16	8
Fam19a5	3.67663e-20	-0.284847	1	1	6.33521e-16	8
Cbln2	7.03688e-20	0.489293	0.942	0.485	1.21252e-15	8
Khdrbs3	1.23091e-19	-0.350447	0.953	0.971	2.12098e-15	8
Fgfr1	1.31511e-19	-0.309445	0.721	0.914	2.26607e-15	8
Gad2	2.681e-19	-0.676943	0.116	0.616	4.61962e-15	8
Plxna2	2.71431e-19	-0.308427	0.721	0.924	4.67702e-15	8
Smim13	4.92862e-19	0.307153	1	0.994	8.4925e-15	8
Fbxo2	5.4481e-19	0.447982	1	0.958	9.38762e-15	8
Amigo2	5.71799e-19	-0.479162	0.628	0.842	9.85266e-15	8
Ptprd	6.05671e-19	-0.307702	0.895	0.967	1.04363e-14	8
Fam19a2	9.33027e-19	-0.379884	0.058	0.568	1.6077e-14	8
Tmsb4x	1.04308e-18	0.287628	1	1	1.79733e-14	8
Cited1	1.16217e-18	0.647083	0.942	0.763	2.00253e-14	8
En1	1.3866e-18	-0.330541	0.988	0.997	2.38926e-14	8
Ptprm	1.4885e-18	-0.294256	0.826	0.926	2.56484e-14	8
Pcdh17	5.27164e-18	0.431283	1	0.857	9.08357e-14	8
Nefm	1.31335e-17	0.36013	0.919	0.681	2.26303e-13	8
Hspa12a	1.33795e-17	0.268248	0.965	0.748	2.30542e-13	8
Asb4	2.16245e-17	-1.05281	0.163	0.602	3.72611e-13	8
Ina	2.42891e-17	0.270549	1	0.999	4.18526e-13	8
Pam	4.51094e-17	-0.763057	0.988	0.976	7.77281e-13	8
Ppp2r2b	5.78566e-17	-0.280619	1	0.998	9.96928e-13	8
Pea15a	6.02492e-17	0.352142	1	0.999	1.03815e-12	8
Edil3	7.41233e-17	-0.372204	0.628	0.897	1.27722e-12	8
Rprm	1.41015e-16	-0.524681	0.07	0.549	2.42983e-12	8
Fev	2.27022e-16	-0.306042	1	1	3.91182e-12	8
Opcml	2.45462e-16	0.343719	1	0.989	4.22955e-12	8
Mgat4c	2.68186e-16	0.313316	1	0.951	4.62111e-12	8
Myh7	3.50245e-16	-0.351631	0.419	0.724	6.03506e-12	8
Igfbp5	3.92838e-16	0.380458	0.93	0.727	6.769e-12	8
Serpini1	7.65595e-16	-0.355196	0.802	0.933	1.3192e-11	8
Fgf13	8.66454e-16	0.417531	0.942	0.886	1.49299e-11	8
Ctsz	1.38344e-15	-0.384948	0.64	0.831	2.3838e-11	8
Enho	3.47099e-15	0.294992	1	0.996	5.98086e-11	8
Btbd3	4.20314e-15	-0.279501	0.593	0.835	7.24242e-11	8
Fstl1	7.48355e-15	-0.346096	0.86	0.904	1.28949e-10	8
Pcdh10	7.93414e-15	-0.451217	0.837	0.921	1.36713e-10	8
Nbl1	8.1052e-15	-0.56887	0.744	0.816	1.39661e-10	8
Vsnl1	9.48976e-15	-0.634955	0.977	0.996	1.63518e-10	8
Pcsk6	5.04975e-14	-0.292501	0.291	0.624	8.70122e-10	8
Wfdc12	7.99344e-14	-0.457349	0.64	0.798	1.37735e-09	8
Slit2	9.59592e-14	0.257335	0.988	0.613	1.65347e-09	8
Cpne4	9.68858e-14	0.289289	0.872	0.631	1.66944e-09	8
Id4	1.48138e-13	-0.331341	1	0.991	2.55256e-09	8
Kcnd2	2.12429e-13	-0.340407	0.86	0.939	3.66036e-09	8
Thy1	2.60809e-13	0.324079	0.965	0.73	4.49401e-09	8
Tox2	3.52005e-13	-0.281174	0.977	0.979	6.0654e-09	8
St8sia2	3.90466e-13	-0.256869	0.267	0.615	6.72812e-09	8
Fam3c	5.08737e-13	-0.511546	0.977	0.989	8.76605e-09	8
Ildr2	6.72953e-13	-0.263856	0.872	0.918	1.15957e-08	8
Nxph4	7.07953e-13	-0.36997	0.535	0.779	1.21987e-08	8
Vstm2a	7.1902e-13	0.331877	1	0.968	1.23894e-08	8
Crct1	8.34431e-13	0.362608	0.767	0.428	1.43781e-08	8
Ptprz1	1.10875e-12	-0.279583	0.686	0.864	1.91048e-08	8
Rbms3	1.22531e-12	-0.398013	0.988	0.985	2.11132e-08	8
Robo2	1.35129e-12	-0.257881	0.802	0.864	2.32841e-08	8
Phlda1	2.03572e-12	-0.381128	0.628	0.806	3.50774e-08	8
Pdyn	2.16622e-12	-0.375338	0.093	0.484	3.73262e-08	8
Sparcl1	3.79175e-12	-0.430157	0.779	0.88	6.53356e-08	8
Col25a1	8.51859e-12	-0.44645	0.767	0.89	1.46784e-07	8
Ret	8.84759e-12	-0.303448	0.07	0.433	1.52453e-07	8
Pbx1	1.09161e-11	-0.332182	1	0.993	1.88095e-07	8
Alcam	1.48214e-11	0.262762	0.942	0.732	2.55387e-07	8
Zbtb20	1.80756e-11	-0.467291	0.988	0.987	3.11461e-07	8
Itm2b	1.91405e-11	-0.27717	1	1	3.29811e-07	8
Glra2	2.28424e-11	-0.251609	0.884	0.906	3.93598e-07	8
Lypd1	3.56909e-11	0.647434	0.988	0.847	6.1499e-07	8
Rspo3	4.44225e-11	-0.312373	0.012	0.368	7.65444e-07	8
Aldoc	6.76986e-11	-0.378372	0.988	0.995	1.16651e-06	8
Cryba2	1.08914e-10	-0.292639	1	0.987	1.8767e-06	8
Fstl5	1.21695e-10	-0.306569	0.453	0.701	2.09693e-06	8
Calcr	2.29506e-10	-0.305565	0	0.333	3.95462e-06	8
Elmo1	2.61771e-10	0.266191	0.849	0.539	4.51057e-06	8
Slc17a8	1.18578e-09	0.284794	0.977	0.622	2.04321e-05	8
Pantr1	1.19153e-09	-0.258536	0.465	0.705	2.05312e-05	8
Calb2	2.67652e-08	0.325175	0.628	0.313	0.000461191	8
Vgf	3.01759e-08	0.469191	0.965	0.863	0.000519961	8
Unc5d	4.60083e-08	-0.257973	0.849	0.85	0.000792769	8
Adcy2	6.36476e-08	-0.250334	0.5	0.681	0.00109671	8
Gad1	8.1074e-08	-0.411501	0.047	0.31	0.00139699	8
Rab3c	2.1889e-07	0.264921	1	0.994	0.0037717	8
Stmn1	3.10765e-07	0.255127	1	1	0.0053548	8
Tmem114	4.13707e-07	-0.378227	0.686	0.755	0.00712859	8
Dlk1	5.6822e-07	-0.926169	0.488	0.664	0.00979099	8
Prph	6.41262e-07	-0.564133	0.43	0.582	0.0110496	8
Nxph1	2.83221e-06	-0.346609	0.593	0.686	0.0488019	8
Crip1	4.80203e-06	-0.301565	0.244	0.457	0.0827437	8
Resp18	8.50777e-06	-0.348274	1	0.998	0.146597	8
Rgs10	3.14718e-05	-0.591095	0.57	0.652	0.542291	8
Necab2	8.10781e-05	-0.261598	0.953	0.976	1	8
Ctsl	0.000179344	-0.360009	0.977	0.989	1	8
Cxcl14	0.000198394	-0.260006	0.163	0.343	1	8
Hs3st4	0.00738054	-0.263612	0.523	0.54	1	8
Mctp1	0.00769807	-0.252471	0.779	0.712	1	8
Cbln4	0.00818087	-0.280157	0.802	0.752	1	8
Maf	1.38225e-113	0.93893	0.986	0.282	2.38176e-109	9
Pcp4	9.26262e-77	1.1568	1	0.997	1.59604e-72	9
Nos1	4.53907e-75	0.662833	0.716	0.156	7.82128e-71	9
Wnt5a	3.84383e-71	0.670454	0.98	0.579	6.6233e-67	9
Tpbg	9.5501e-65	0.429255	0.764	0.181	1.64558e-60	9
Cacna2d3	6.24291e-64	0.389582	0.824	0.277	1.07572e-59	9
Ntng1	2.25681e-59	0.450048	0.892	0.284	3.88871e-55	9
Hcn1	2.95566e-57	0.632674	0.939	0.566	5.0929e-53	9
Ramp3	6.66125e-56	0.257982	0.723	0.205	1.1478e-51	9
Cacng5	8.11989e-54	0.415917	0.716	0.23	1.39914e-49	9
Nxph1	8.46659e-54	0.756962	0.98	0.663	1.45888e-49	9
Nrcam	1.76122e-52	0.575798	1	0.958	3.03476e-48	9
Nbl1	2.60631e-52	0.632342	1	0.801	4.49093e-48	9
Pcdh15	3.19737e-51	0.443834	0.953	0.495	5.50939e-47	9
Plcb4	2.00879e-50	0.673879	1	0.981	3.46135e-46	9
Sema6d	2.01733e-48	0.417578	0.973	0.748	3.47606e-44	9
Tmem108	5.75113e-48	0.329462	0.912	0.483	9.90978e-44	9
Klhl13	2.70058e-47	0.384002	0.993	0.654	4.65337e-43	9
Ppfia2	1.26866e-44	0.402972	1	0.97	2.18603e-40	9
Sorl1	5.29353e-44	0.408134	1	0.943	9.12128e-40	9
Rspo3	2.48486e-43	0.53088	0.831	0.323	4.28167e-39	9
Ap1s2	3.26229e-43	0.301373	0.919	0.481	5.62125e-39	9
Ntn1	4.23518e-43	0.271444	0.682	0.255	7.29764e-39	9
Nell2	3.95367e-42	0.387538	0.986	0.738	6.81257e-38	9
Grin2a	4.07542e-42	0.364686	0.98	0.623	7.02235e-38	9
Fgf9	4.11533e-42	0.380526	0.892	0.482	7.09113e-38	9
Kcnc1	2.10981e-41	0.372391	1	0.987	3.63541e-37	9
Epha5	3.00225e-41	0.528946	1	0.851	5.17317e-37	9
Mgll	1.6066e-40	0.482597	0.98	0.688	2.76833e-36	9
Gap43	1.69487e-40	0.31816	1	1	2.92043e-36	9
Gabrg3	2.05516e-40	0.302192	0.926	0.426	3.54125e-36	9
Crh	2.18679e-40	0.364381	0.473	0.111	3.76806e-36	9
Raph1	8.18318e-40	0.368716	1	0.98	1.41004e-35	9
Cpne5	1.10755e-39	-0.492658	0.527	0.886	1.90842e-35	9
Slit2	1.92387e-39	0.385776	0.986	0.602	3.31502e-35	9
Nudt4	9.78172e-39	0.389626	1	0.94	1.68549e-34	9
Dstn	4.73523e-38	0.291931	1	1	8.15927e-34	9
Celf2	9.91247e-37	0.317908	0.993	0.88	1.70802e-32	9
Lpar1	4.92816e-36	0.312466	0.932	0.525	8.49172e-32	9
Rgs2	2.62045e-35	0.630915	0.986	0.95	4.5153e-31	9
Cbln4	1.23953e-34	0.359823	1	0.737	2.13583e-30	9
Calb1	1.65224e-34	0.63475	0.959	0.767	2.84697e-30	9
Tmem176b	4.96772e-34	-0.420409	0.432	0.812	8.55988e-30	9
Palmd	2.83067e-33	0.290988	0.912	0.643	4.87753e-29	9
Gsta4	3.49389e-33	0.369902	0.953	0.634	6.02033e-29	9
Gchfr	5.32342e-33	0.331886	1	0.996	9.17279e-29	9
Atp2b4	2.98743e-32	-0.32925	0.689	0.849	5.14764e-28	9
Pbx3	4.49205e-32	0.332473	0.993	0.86	7.74026e-28	9
Cd63	4.82846e-32	-0.458654	0.446	0.808	8.31991e-28	9
Camk2d	6.36487e-32	0.310972	1	0.98	1.09673e-27	9
Rgs17	7.78842e-32	0.293501	1	0.997	1.34202e-27	9
Prmt8	1.48555e-31	-0.356208	0.25	0.717	2.55975e-27	9
Scn3b	2.20145e-31	0.322628	0.986	0.981	3.79331e-27	9
Plxna4	2.22453e-31	0.393704	0.946	0.81	3.83309e-27	9
Dpp10	6.11973e-31	0.318212	0.986	0.951	1.05449e-26	9
Gch1	1.4425e-30	-0.388542	1	0.972	2.48558e-26	9
Il1r1	5.22201e-30	-0.274898	0.23	0.682	8.99805e-26	9
Rgs10	6.24625e-30	0.584934	0.946	0.629	1.07629e-25	9
Ptprd	1.22077e-29	0.304399	0.986	0.963	2.10352e-25	9
Id4	1.74283e-29	0.312905	1	0.99	3.00307e-25	9
Pcdh11x	2.75366e-29	0.369326	0.797	0.355	4.74483e-25	9
Gata3	2.91109e-29	-0.328631	0.986	0.99	5.0161e-25	9
Tmem176a	3.31666e-29	-0.330034	0.345	0.755	5.71494e-25	9
Prkcq	3.79528e-29	-0.404417	0.074	0.572	6.53964e-25	9
Synm	8.05964e-29	0.272282	0.568	0.229	1.38876e-24	9
Mal2	8.24784e-29	0.305232	1	0.98	1.42119e-24	9
Impact	1.13936e-28	-0.295274	1	1	1.96322e-24	9
Cachd1	1.3443e-28	0.27217	0.973	0.783	2.31637e-24	9
Arhgap24	1.7425e-28	-0.277916	0.764	0.916	3.0025e-24	9
Sh3kbp1	9.70258e-28	0.261251	0.98	0.924	1.67185e-23	9
Mrap2	1.43675e-27	0.313987	1	0.925	2.47566e-23	9
Hs3st4	1.67387e-27	-0.494108	0.081	0.57	2.88425e-23	9
Nsg2	1.81111e-27	0.263638	1	1	3.12073e-23	9
Sorcs3	2.94399e-27	0.258225	0.986	0.954	5.07279e-23	9
Pgm2l1	4.05125e-27	0.387317	1	0.995	6.98072e-23	9
Rasgrf2	4.31372e-27	0.260561	0.818	0.419	7.43297e-23	9
Chn2	2.29012e-26	0.340878	0.993	0.875	3.9461e-22	9
Cacna1e	2.76398e-26	0.288692	0.993	0.949	4.76261e-22	9
Prph	6.99305e-26	-0.681206	0.189	0.603	1.20497e-21	9
Cpne4	8.02043e-26	-0.334804	0.257	0.666	1.382e-21	9
Iqsec3	1.32092e-25	0.281997	0.959	0.874	2.27608e-21	9
Cplx2	4.95493e-25	-0.478989	1	0.986	8.53784e-21	9
Aldoc	5.01078e-25	-0.446479	1	0.995	8.63408e-21	9
Slc7a8	6.4045e-25	0.290339	0.993	0.926	1.10356e-20	9
Samd4	1.63279e-24	-0.324298	0.946	0.981	2.81347e-20	9
Nxph4	4.93807e-24	-0.39068	0.466	0.791	8.50878e-20	9
Zbtb20	6.06874e-24	0.363629	1	0.986	1.0457e-19	9
Cdh13	6.32116e-24	-0.564147	0.966	0.962	1.0892e-19	9
Col25a1	7.95376e-24	0.423634	1	0.878	1.37051e-19	9
Dlgap1	3.57021e-23	0.280338	0.966	0.911	6.15184e-19	9
Fut9	3.69885e-23	0.304977	1	0.989	6.37349e-19	9
Rasgrf1	4.79262e-23	-0.262533	1	0.997	8.25817e-19	9
Ptma	5.8122e-23	-0.275148	1	1	1.0015e-18	9
Nr2f2	6.75035e-23	0.273399	0.588	0.242	1.16315e-18	9
Faim2	6.76242e-23	0.261932	1	1	1.16523e-18	9
Htr1a	3.08203e-22	0.2608	0.986	0.912	5.31065e-18	9
Tmem255a	5.09913e-22	-0.437247	0.912	0.922	8.7863e-18	9
Slc17a8	8.5951e-22	0.502288	0.939	0.615	1.48102e-17	9
Khdrbs3	1.16755e-21	0.280674	1	0.969	2.0118e-17	9
Pcsk6	1.59978e-21	-0.279136	0.291	0.633	2.75657e-17	9
Arhgap36	1.98281e-21	-0.754441	0.169	0.542	3.41659e-17	9
Vsnl1	2.11019e-21	-0.588143	1	0.995	3.63608e-17	9
Frmpd3	2.91315e-21	-0.261965	0.709	0.869	5.01966e-17	9
Adcy2	3.31638e-21	0.292329	0.953	0.655	5.71445e-17	9
Xbp1	6.11156e-21	0.276685	1	0.994	1.05308e-16	9
Prdx1	7.92465e-21	-0.317161	0.986	0.997	1.3655e-16	9
Pax5	8.72079e-21	-0.306009	0.264	0.599	1.50268e-16	9
Gstm1	8.79984e-21	-0.259791	0.784	0.876	1.5163e-16	9
Pam	1.05323e-20	-0.640615	0.986	0.976	1.81481e-16	9
Fjx1	1.24377e-20	0.265802	0.899	0.544	2.14313e-16	9
Anks1b	2.18709e-20	0.254498	0.986	0.963	3.76857e-16	9
Pcdh10	3.88325e-20	0.270653	1	0.912	6.69123e-16	9
Hcrtr1	4.04143e-20	-0.361774	0.446	0.718	6.96378e-16	9
Ppp1r1a	5.09734e-20	-0.265594	0.919	0.954	8.78322e-16	9
Cpne7	8.13065e-20	0.296302	0.993	0.92	1.40099e-15	9
Nr3c1	5.43772e-19	-0.280595	0.986	0.965	9.36973e-15	9
Car10	1.25316e-18	-0.306957	0.851	0.943	2.15932e-14	9
Hspb1	8.49759e-18	-0.252306	0.034	0.386	1.46422e-13	9
Phlda1	9.33181e-18	-0.362934	0.655	0.809	1.60796e-13	9
Ldha	1.2222e-17	-0.276747	1	0.999	2.10598e-13	9
Pantr1	5.80604e-17	-0.270704	0.473	0.711	1.00044e-12	9
Arpc1a	7.81988e-17	-0.271049	1	0.999	1.34744e-12	9
Tmem114	1.18705e-16	-0.45522	0.655	0.759	2.04541e-12	9
Ntrk3	1.49473e-16	-0.256962	1	0.982	2.57557e-12	9
Nefl	1.68998e-16	0.258714	0.986	0.879	2.91201e-12	9
Crip2	1.14699e-15	-0.293763	0.946	0.944	1.97638e-11	9
Psmb2	1.90027e-15	-0.296432	0.966	0.984	3.27436e-11	9
Fam46a	2.15826e-15	0.323559	0.716	0.47	3.7189e-11	9
Asb4	2.81559e-15	-0.866637	0.351	0.602	4.85154e-11	9
Gfra1	5.52847e-15	0.284041	1	0.948	9.52611e-11	9
Prkcb	8.79361e-15	-0.291968	0.899	0.943	1.51523e-10	9
Opcml	1.1343e-14	-0.299186	0.973	0.99	1.95451e-10	9
Cryba2	1.77233e-14	0.318437	1	0.986	3.05391e-10	9
Fam19a2	4.65329e-14	-0.261873	0.25	0.569	8.01808e-10	9
Gucy1a3	6.28895e-14	-0.313153	0.892	0.936	1.08365e-09	9
Pcsk1n	6.55295e-13	0.252679	1	1	1.12914e-08	9
Rprm	9.24463e-13	0.366632	0.75	0.517	1.59294e-08	9
Ctsl	1.72074e-12	-0.390486	0.98	0.99	2.965e-08	9
S100a11	1.533e-11	-0.262156	0.642	0.734	2.64151e-07	9
Marcksl1	2.00012e-11	-0.26846	0.588	0.766	3.44641e-07	9
Crip1	5.61799e-11	-0.312448	0.216	0.465	9.68036e-07	9
Cdyl2	5.70501e-11	-0.266116	0.973	0.95	9.8303e-07	9
Pcdh17	6.48043e-11	-0.326347	0.878	0.861	1.11664e-06	9
Nnat	1.02708e-10	-0.35855	0.703	0.839	1.76976e-06	9
Mctp1	3.69402e-10	0.259524	0.845	0.706	6.36516e-06	9
Ptprt	1.2101e-09	-0.2584	0.905	0.917	2.08512e-05	9
Cbln2	1.20545e-08	-0.335753	0.324	0.514	0.000207711	9
Caly	1.22013e-07	-0.272881	1	0.999	0.0021024	9
Gad1	1.68533e-07	-0.336019	0.122	0.312	0.00290399	9
AY036118	3.84349e-07	-0.291193	0.689	0.802	0.00662272	9
Ubb	7.49128e-07	-0.277815	1	1	0.0129082	9
Vgf	7.31811e-06	-0.386628	0.865	0.866	0.126098	9
Gad2	1.57886e-05	-0.277751	0.453	0.607	0.272054	9
Gm26737	2.59569e-05	0.281802	0.52	0.359	0.447264	9
Spock3	8.38315e-05	-0.280141	0.993	0.98	1	9
Hs3st5	3.93822e-83	0.275033	0.92	0.348	6.78594e-79	10
Cbln2	2.09402e-81	0.710337	0.954	0.451	3.6082e-77	10
Npy2r	3.30701e-79	0.327226	0.853	0.306	5.69831e-75	10
Hcrtr2	8.72332e-79	0.329362	0.933	0.438	1.50312e-74	10
Tshz2	6.81814e-68	0.285531	0.887	0.357	1.17483e-63	10
Cited1	1.26742e-61	0.573716	0.996	0.744	2.18389e-57	10
Vsnl1	3.28128e-61	-0.864862	0.975	0.998	5.65398e-57	10
Clcn5	1.69327e-59	0.327493	0.996	0.95	2.91768e-55	10
Chn2	7.48268e-59	0.386673	1	0.869	1.28934e-54	10
Slc17a8	1.16356e-57	0.630959	0.987	0.596	2.00493e-53	10
Negr1	1.27524e-57	-0.45869	0.996	0.998	2.19737e-53	10
Cntn1	7.81255e-56	0.34747	1	1	1.34618e-51	10
Resp18	2.36923e-52	-0.769541	0.996	0.999	4.08242e-48	10
Ntm	7.36305e-52	0.424433	0.992	0.826	1.26873e-47	10
Crtac1	7.52266e-51	0.364539	0.987	0.883	1.29623e-46	10
Hspa12a	9.25913e-50	0.263463	0.979	0.731	1.59544e-45	10
Cacna2d1	2.56498e-49	-0.440582	1	0.999	4.41972e-45	10
Cdh13	2.34099e-48	-0.696705	0.979	0.961	4.03377e-44	10
Fam19a2	8.8645e-48	-0.387672	0.088	0.601	1.52744e-43	10
Pam	1.26678e-47	-0.803588	0.996	0.974	2.1828e-43	10
Ubl3	1.96157e-47	0.276268	1	0.984	3.37998e-43	10
Asb4	5.23267e-46	-1.03947	0.164	0.634	9.01642e-42	10
Btbd3	2.38541e-43	-0.303239	0.639	0.847	4.1103e-39	10
Opcml	2.59228e-43	0.343648	1	0.988	4.46676e-39	10
Napb	4.87281e-42	0.251397	1	1	8.39633e-38	10
Anks1b	8.2647e-41	0.301888	0.996	0.961	1.42409e-36	10
Zfhx3	9.57766e-41	0.279701	1	0.958	1.65033e-36	10
Dnm3	2.10895e-40	0.265503	1	0.999	3.63392e-36	10
Rprm	2.58502e-38	-0.54168	0.151	0.575	4.45425e-34	10
mt-Co1	2.96233e-38	0.27002	1	1	5.10439e-34	10
St8sia6	3.93132e-38	0.265558	0.987	0.794	6.77405e-34	10
Cthrc1	3.97058e-38	-0.381278	0.996	0.981	6.84171e-34	10
Fstl5	6.00553e-37	-0.356992	0.361	0.729	1.03481e-32	10
S100a11	3.11877e-36	0.290612	0.962	0.702	5.37394e-32	10
Pcsk6	1.05764e-35	-0.293004	0.294	0.647	1.82243e-31	10
Pcdh19	3.8142e-35	0.31028	0.878	0.592	6.57225e-31	10
Nbl1	8.21772e-35	-0.514721	0.66	0.83	1.41599e-30	10
Sphkap	8.59855e-35	-0.284469	0.303	0.682	1.48162e-30	10
Prmt8	2.56893e-34	-0.323335	0.462	0.713	4.42652e-30	10
Myh7	4.11288e-34	-0.340112	0.487	0.738	7.0869e-30	10
Diras2	4.39462e-34	-0.270357	0.769	0.891	7.57237e-30	10
Ajap1	1.05801e-33	-0.322375	0.996	0.987	1.82306e-29	10
Cadm1	1.22047e-33	-0.361872	0.975	0.978	2.103e-29	10
H3f3b	3.89121e-33	-0.345205	1	0.999	6.70494e-29	10
Pde1a	7.29732e-33	-0.427657	0.874	0.91	1.2574e-28	10
Col25a1	2.30584e-32	-0.558321	0.845	0.891	3.9732e-28	10
Cadm2	2.84138e-32	0.334781	1	0.962	4.89597e-28	10
Pcdh17	3.25383e-32	-0.413073	0.609	0.891	5.60667e-28	10
Prkcq	8.13521e-32	-0.38108	0.231	0.576	1.40178e-27	10
St8sia2	9.52526e-32	-0.266344	0.332	0.633	1.6413e-27	10
Plxna4	9.90886e-32	-0.323872	0.643	0.838	1.7074e-27	10
Pbx1	2.12711e-31	-0.372397	0.996	0.993	3.66522e-27	10
Pgm2l1	4.5051e-31	0.264055	1	0.995	7.76274e-27	10
mt-Atp6	6.05832e-31	0.253391	1	1	1.04391e-26	10
Gad2	8.82239e-31	-0.551176	0.265	0.635	1.52019e-26	10
Sema3c	5.42597e-30	0.304894	0.786	0.446	9.34948e-26	10
Ctsl	7.1417e-30	-0.503873	0.987	0.989	1.23059e-25	10
Pax5	7.39171e-30	-0.299748	0.282	0.612	1.27367e-25	10
Snca	2.05748e-29	0.273678	1	0.996	3.54525e-25	10
Crct1	4.26052e-29	0.267399	0.765	0.403	7.34131e-25	10
Qpct	4.38807e-29	-0.251582	0.979	0.976	7.56109e-25	10
Tmem163	4.61125e-29	-0.272431	0.777	0.882	7.94564e-25	10
Bex4	5.20755e-29	0.262845	1	0.999	8.97313e-25	10
Gm42418	6.93411e-29	-0.425622	1	1	1.19482e-24	10
Aldoc	9.91347e-29	-0.383817	0.996	0.995	1.70819e-24	10
Arhgap36	1.12848e-27	-0.725151	0.218	0.553	1.94448e-23	10
Cpne5	3.11592e-27	-0.355353	0.849	0.866	5.36904e-23	10
Itm2b	5.42209e-27	-0.284443	1	1	9.3428e-23	10
Ptprz1	5.66393e-27	-0.27425	0.819	0.861	9.75952e-23	10
Rbms3	8.52636e-27	-0.370152	1	0.984	1.46918e-22	10
Nefl	9.47033e-27	0.27165	0.992	0.874	1.63183e-22	10
Tenm2	1.73898e-26	-0.339225	0.903	0.907	2.99643e-22	10
Peg10	2.69839e-26	-0.395578	0.714	0.909	4.64959e-22	10
Psmb2	1.54238e-25	-0.297925	0.983	0.982	2.65768e-21	10
AY036118	1.65997e-25	-0.425416	0.643	0.812	2.8603e-21	10
Adra1b	3.06167e-25	-0.262139	0.992	0.983	5.27556e-21	10
Alcam	1.20295e-24	-0.321566	0.542	0.762	2.07281e-20	10
Fut9	2.20418e-24	-0.285829	1	0.989	3.79803e-20	10
Gucy1a3	3.3008e-24	-0.338927	0.966	0.93	5.68761e-20	10
Tph2	5.04272e-24	0.267458	1	0.995	8.68911e-20	10
Ly6h	3.83082e-23	-0.293601	1	1	6.60089e-19	10
Dlk1	1.74729e-22	-0.98784	0.45	0.681	3.01075e-18	10
Calb1	2.10421e-22	-0.473993	0.626	0.796	3.62576e-18	10
Pantr1	6.29298e-22	-0.266004	0.563	0.711	1.08434e-17	10
Scg5	4.1007e-21	-0.278472	0.996	0.997	7.06591e-17	10
Caly	9.3651e-21	-0.351207	0.996	1	1.6137e-16	10
Prdx1	3.20735e-20	-0.255154	1	0.996	5.52658e-16	10
Ptprt	6.65546e-20	-0.313054	0.945	0.913	1.1468e-15	10
Serpini1	2.09184e-19	-0.264337	0.912	0.93	3.60445e-15	10
Sparcl1	8.13627e-18	-0.331671	0.87	0.877	1.40196e-13	10
Rgs2	2.49638e-17	0.302889	0.992	0.948	4.30151e-13	10
Ret	3.73312e-17	-0.265969	0.193	0.445	6.43253e-13	10
Ubb	1.47503e-16	-0.362198	1	1	2.54162e-12	10
Amigo2	5.55368e-16	-0.347078	0.815	0.836	9.56955e-12	10
Gad1	8.682e-16	-0.39561	0.084	0.325	1.49599e-11	10
Calcr	8.85749e-16	-0.26597	0.097	0.347	1.52623e-11	10
Cxcl14	1.41996e-12	-0.288754	0.151	0.357	2.44673e-08	10
Prph	4.05784e-12	-0.522471	0.492	0.586	6.99206e-08	10
Phlda1	5.19885e-11	-0.281101	0.798	0.799	8.95814e-07	10
Chga	1.02876e-10	-0.273347	0.992	0.982	1.77265e-06	10
Wfdc12	2.16075e-10	-0.320949	0.866	0.784	3.72319e-06	10
Crip1	2.98678e-10	-0.307069	0.315	0.464	5.14653e-06	10
Zbtb20	4.89076e-10	-0.275575	1	0.986	8.42727e-06	10
Hs3st4	1.67117e-08	-0.302634	0.475	0.546	0.000287959	10
Fam3c	1.33523e-05	-0.263765	1	0.987	0.230073	10
Rgs10	0.00191906	-0.456796	0.681	0.645	1	10
Rspo3	2.05543e-80	0.841485	0.961	0.32	3.54171e-76	11
Fam210b	1.61071e-79	0.575131	0.992	0.438	2.77541e-75	11
Proser2	2.54273e-64	0.292076	0.705	0.164	4.38138e-60	11
Adgrl2	1.39685e-60	0.764267	0.969	0.577	2.40691e-56	11
Mctp1	1.54906e-59	0.793892	1	0.698	2.66918e-55	11
Pvrl3	1.30416e-56	0.357421	0.884	0.332	2.2472e-52	11
Slc17a8	2.14492e-51	0.873945	1	0.614	3.69592e-47	11
Pcdh7	3.99237e-50	0.67838	1	0.683	6.87925e-46	11
Ntng1	6.44301e-50	0.590843	0.829	0.293	1.11019e-45	11
Pcdh17	2.0133e-46	-0.724494	0.388	0.89	3.46912e-42	11
Tpbg	2.48387e-45	0.472538	0.69	0.19	4.27996e-41	11
Crtac1	3.30316e-45	0.528006	0.984	0.888	5.69168e-41	11
Impact	2.33407e-44	-0.434552	1	1	4.02184e-40	11
Tenm2	1.26714e-43	-0.587315	0.581	0.926	2.1834e-39	11
Snca	1.50885e-43	0.465387	1	0.996	2.59989e-39	11
Peg10	1.85063e-43	-0.664901	0.543	0.909	3.18882e-39	11
St8sia6	3.8908e-43	0.413839	0.992	0.803	6.70424e-39	11
Rbfox1	1.90715e-39	0.494137	0.969	0.758	3.2862e-35	11
Ptprt	3.56575e-39	-0.556947	0.651	0.932	6.14414e-35	11
Nxph1	3.60658e-38	0.504078	0.992	0.665	6.21449e-34	11
Cadm2	1.22963e-37	0.469394	1	0.964	2.11877e-33	11
Celf6	9.34828e-37	-0.431014	1	0.997	1.6108e-32	11
Chga	5.913e-36	0.526777	1	0.982	1.01887e-31	11
Cacna2d1	6.68186e-35	-0.514979	0.984	1	1.15135e-30	11
Fgf13	8.93635e-34	-0.464448	0.55	0.907	1.53982e-29	11
Dlgap1	1.32337e-33	-0.396849	0.651	0.93	2.2803e-29	11
Gphn	6.82413e-33	0.285879	0.969	0.813	1.17587e-28	11
Ctnnd2	8.65179e-33	-0.346406	0.915	0.983	1.49079e-28	11
Oasl2	5.66173e-32	0.306377	0.798	0.419	9.75573e-28	11
Mafb	2.74549e-31	0.254963	0.86	0.402	4.73076e-27	11
Pcdh15	3.2094e-30	0.293813	0.922	0.5	5.53012e-26	11
Bcat1	4.13815e-30	0.343646	1	0.977	7.13045e-26	11
Cdh13	4.55205e-30	-0.725461	0.93	0.964	7.84363e-26	11
Tmem176a	6.10156e-30	-0.352099	0.248	0.757	1.05136e-25	11
Epha5	2.83579e-29	0.434904	0.992	0.853	4.88634e-25	11
Phactr1	1.14132e-28	0.363292	0.969	0.85	1.96661e-24	11
Ube2ql1	1.65543e-28	-0.338839	0.961	0.987	2.85247e-24	11
Cbln2	5.04309e-28	0.399384	0.93	0.477	8.68974e-24	11
Mmp17	1.40877e-27	0.263522	0.961	0.654	2.42745e-23	11
Cited1	4.26864e-27	0.378352	1	0.756	7.3553e-23	11
Cpne5	4.96222e-27	-0.443001	0.705	0.873	8.5504e-23	11
Itm2c	8.86526e-27	-0.284348	1	1	1.52757e-22	11
Tmem176b	5.26872e-26	-0.368353	0.419	0.809	9.07853e-22	11
Prmt2	6.14855e-25	-0.275275	1	1	1.05946e-20	11
Grin2a	6.8179e-25	0.27831	0.953	0.628	1.17479e-20	11
Ncald	7.20283e-25	-0.285005	1	0.999	1.24112e-20	11
Prkcq	1.31189e-24	-0.413378	0.109	0.566	2.26053e-20	11
Slit2	1.45628e-24	0.321542	0.969	0.606	2.50931e-20	11
Tmem114	1.61051e-24	-0.542464	0.442	0.77	2.77507e-20	11
Grm5	3.21287e-24	-0.284362	0.07	0.552	5.5361e-20	11
Fam19a2	4.07336e-24	-0.366753	0.109	0.575	7.01881e-20	11
Kcnq3	9.8907e-24	0.335609	1	0.863	1.70427e-19	11
Cthrc1	5.1684e-23	0.348123	1	0.982	8.90566e-19	11
Cpne4	4.46396e-22	-0.308453	0.209	0.665	7.69185e-18	11
Anks1b	6.40715e-22	0.277556	1	0.963	1.10402e-17	11
Asic2	6.70601e-22	-0.289286	0.946	0.96	1.15551e-17	11
Faim2	9.79301e-22	0.289519	1	1	1.68743e-17	11
Arhgap36	1.00257e-21	-0.773682	0.116	0.542	1.72753e-17	11
Cdk14	1.34072e-21	0.255516	1	0.995	2.31019e-17	11
Plcb4	1.3595e-21	0.278378	1	0.981	2.34255e-17	11
AW551984	1.56156e-21	-0.275353	0.984	0.993	2.69072e-17	11
Tox2	2.4675e-21	-0.300594	0.984	0.979	4.25174e-17	11
Efhd2	2.87375e-21	0.301252	1	0.985	4.95175e-17	11
Vstm2l	3.44422e-21	-0.32395	0.667	0.835	5.93474e-17	11
Cpe	9.09529e-21	0.351229	1	1	1.56721e-16	11
Cntnap2	2.53279e-20	0.289127	0.992	0.976	4.36425e-16	11
Nrcam	3.33839e-20	0.299656	0.969	0.96	5.75238e-16	11
Vat1l	7.09934e-20	-0.342136	1	0.987	1.22329e-15	11
Dpp10	3.08194e-19	0.254037	1	0.95	5.31048e-15	11
S100a16	6.76643e-19	-0.283503	0.488	0.742	1.16592e-14	11
Dkk3	1.41883e-18	0.262736	0.922	0.642	2.44478e-14	11
Marcks	1.4775e-18	-0.271632	1	0.997	2.54587e-14	11
Tph2	1.93291e-18	0.322099	1	0.995	3.3306e-14	11
Baiap3	3.62007e-18	-0.266334	0.984	0.988	6.23774e-14	11
Zfhx3	6.54366e-18	0.250839	1	0.96	1.12754e-13	11
Pcsk1	2.99392e-17	-0.251475	0.69	0.864	5.15883e-13	11
Rgs2	4.64862e-17	0.363312	0.992	0.95	8.01004e-13	11
Ctsl	5.92739e-17	-0.480113	0.992	0.989	1.02135e-12	11
Nbl1	6.51591e-17	0.369004	1	0.802	1.12276e-12	11
Gpx3	9.78741e-17	-0.354261	0.643	0.79	1.68647e-12	11
Pam	1.64819e-16	-0.627404	1	0.975	2.84e-12	11
Zcchc12	2.24987e-16	-0.265136	1	0.999	3.87675e-12	11
Cplx2	2.29514e-16	-0.378527	0.992	0.986	3.95476e-12	11
Serpine2	3.83015e-16	0.373134	0.907	0.792	6.59974e-12	11
Sphkap	5.09638e-16	-0.264118	0.372	0.659	8.78157e-12	11
Car10	7.39931e-16	-0.309645	0.891	0.94	1.27498e-11	11
Cplx1	1.40568e-15	0.251725	1	0.959	2.42212e-11	11
Asb4	2.02721e-15	-0.94413	0.341	0.6	3.49309e-11	11
Nos1	3.55641e-15	0.332724	0.442	0.177	6.12805e-11	11
Pmepa1	4.48653e-15	0.273547	0.977	0.957	7.73074e-11	11
Nrxn3	5.70271e-14	0.261929	0.961	0.76	9.82634e-10	11
Gucy1a3	1.19074e-13	-0.336968	0.984	0.931	2.05176e-09	11
Cadm1	4.29515e-13	-0.300258	0.961	0.978	7.40097e-09	11
Cxcl14	1.13497e-12	-0.296069	0.047	0.353	1.95566e-08	11
Cdyl2	1.41692e-12	-0.306135	1	0.948	2.44149e-08	11
Sncg	1.59211e-12	0.288306	1	0.937	2.74337e-08	11
Calb1	1.69131e-12	-0.402024	0.589	0.79	2.91429e-08	11
Vwc2	2.19277e-12	-0.260764	0.729	0.843	3.77836e-08	11
Maob	7.39348e-12	0.250366	0.961	0.959	1.27397e-07	11
Jund	8.95529e-12	-0.261966	1	1	1.54309e-07	11
Slc6a1	1.58179e-11	-0.262725	0.558	0.748	2.72558e-07	11
Vgf	2.03485e-11	-0.487683	0.775	0.872	3.50626e-07	11
Ly6h	2.12982e-11	-0.258337	1	1	3.6699e-07	11
Myh7	6.18207e-11	-0.26834	0.605	0.719	1.06523e-06	11
Cd63	1.82501e-10	-0.285982	0.69	0.791	3.14467e-06	11
Gm42418	2.83348e-10	-0.348906	1	1	4.88238e-06	11
Sparcl1	1.26532e-09	-0.292901	0.721	0.885	2.18028e-05	11
Fstl5	1.73069e-09	-0.259327	0.535	0.701	2.98215e-05	11
Hcrtr1	1.76082e-09	-0.297507	0.597	0.707	3.03407e-05	11
Prph	3.28764e-09	-0.565269	0.442	0.584	5.66493e-05	11
Nnat	1.95983e-08	-0.296866	0.744	0.835	0.000337698	11
Caly	2.77344e-08	-0.276759	1	0.999	0.000477891	11
Ubb	4.60521e-06	-0.302105	1	1	0.0793524	11
Dlk1	7.10231e-06	-0.548674	0.55	0.664	0.12238	11
Xist	1.15564e-05	-0.39535	0.209	0.378	0.199129	11
Gad1	2.40377e-05	-0.281147	0.147	0.309	0.414193	11
AY036118	3.70349e-05	-0.27641	0.705	0.801	0.638149	11
Pdyn	7.61607e-05	-0.258202	0.349	0.477	1	11
Wfdc12	0.000218517	-0.273906	0.891	0.787	1	11
Resp18	0.000330207	-0.284318	1	0.998	1	11
Calb2	0.00212998	-0.369326	0.225	0.33	1	11
Zeb2	0	1.19296	0.991	0.021	0	12
Met	0	0.908107	0.972	0.015	0	12
Tacr3	5.88371e-270	0.388611	0.78	0.017	1.01382e-265	12
Tecrl	1.28007e-269	0.346866	0.78	0.018	2.20569e-265	12
Arhgap15	6.14064e-256	0.251522	0.697	0.012	1.05809e-251	12
S1pr3	1.23214e-157	0.543303	0.936	0.104	2.12311e-153	12
Fam114a1	4.35836e-135	0.456998	0.936	0.112	7.5099e-131	12
Rxfp1	1.74364e-129	0.42499	0.853	0.1	3.00446e-125	12
P2ry1	4.58979e-122	0.412338	0.853	0.112	7.90867e-118	12
Rtn4rl1	1.67042e-115	0.279947	0.716	0.071	2.87829e-111	12
Lmo1	6.17808e-107	0.257744	0.725	0.078	1.06454e-102	12
Chrm2	2.57496e-98	0.608678	1	0.244	4.43691e-94	12
S100b	9.32209e-92	1.52413	0.853	0.174	1.60629e-87	12
Nr2f2	1.12888e-87	0.694581	0.972	0.229	1.94517e-83	12
Adamtsl1	1.53269e-87	0.367094	0.789	0.134	2.64097e-83	12
Utrn	1.59632e-87	1.26892	1	0.361	2.75062e-83	12
Galnt18	4.00969e-84	0.441442	0.936	0.234	6.9091e-80	12
Pdlim5	4.80824e-84	0.904825	1	0.37	8.28508e-80	12
Arpp21	1.5234e-80	0.606061	0.945	0.26	2.62498e-76	12
Kcna4	2.4547e-76	0.775388	0.991	0.446	4.22969e-72	12
Pcp4l1	5.22712e-75	1.4105	1	0.477	9.00685e-71	12
Unc5c	3.10117e-74	0.622186	0.991	0.387	5.34363e-70	12
Calcr	2.9769e-73	0.8607	0.963	0.29	5.1295e-69	12
Lpar1	3.39986e-67	0.784314	1	0.529	5.85829e-63	12
Kcnd2	7.39791e-67	1.05354	1	0.933	1.27473e-62	12
Elmo1	1.32651e-66	0.877236	0.982	0.53	2.28571e-62	12
Cdk14	2.21677e-66	-1.1051	0.908	0.999	3.81972e-62	12
Ube2e3	2.63875e-66	0.909621	1	0.985	4.54682e-62	12
Gfra1	5.76838e-66	-1.02036	0.147	0.991	9.93949e-62	12
Slc6a17	1.39355e-65	0.844258	1	0.971	2.40123e-61	12
Zbtb20	2.06242e-65	-1.54847	0.761	0.998	3.55376e-61	12
Spock3	5.88075e-65	1.01362	1	0.979	1.01331e-60	12
Synpr	1.6935e-64	0.597972	0.908	0.271	2.91806e-60	12
Camk2d	4.97425e-64	1.04838	1	0.981	8.57113e-60	12
Tox3	1.11148e-63	0.436847	0.89	0.242	1.91519e-59	12
Dgkk	2.49481e-63	-0.949503	0.183	0.97	4.2988e-59	12
Cited1	4.35449e-63	1.33358	1	0.759	7.50322e-59	12
Syn2	4.84832e-63	-0.739464	0.881	0.998	8.35414e-59	12
Elavl2	8.77454e-63	-1.27471	0.761	0.994	1.51194e-58	12
Grm5	1.19735e-62	0.707335	0.991	0.503	2.06315e-58	12
Atp2b1	2.07479e-62	-0.879485	1	0.999	3.57507e-58	12
Asic2	5.76212e-62	-0.707619	0.45	0.984	9.92871e-58	12
Herc3	1.03546e-61	0.898219	1	0.947	1.7842e-57	12
Scn9a	2.50374e-61	-0.806218	0.486	0.976	4.3142e-57	12
Sez6l	3.43373e-61	-0.744045	0.349	0.968	5.91666e-57	12
Glra2	4.56811e-61	-0.749104	0.073	0.946	7.87131e-57	12
Mgll	7.26166e-61	0.873452	1	0.692	1.25126e-56	12
Pde4b	1.30532e-60	0.507661	0.954	0.412	2.2492e-56	12
Pitpnc1	6.77973e-60	-1.00845	0.651	0.976	1.16822e-55	12
Rras2	2.12719e-59	0.30079	0.853	0.286	3.66536e-55	12
Nap1l5	7.80206e-59	0.588685	1	0.993	1.34437e-54	12
Peg10	1.22811e-58	1.18138	1	0.884	2.11616e-54	12
Chga	1.3369e-58	-0.929113	0.743	0.994	2.30361e-54	12
Epha6	2.9744e-58	0.251102	0.725	0.167	5.12519e-54	12
Tenm1	7.88302e-58	0.693401	1	0.921	1.35832e-53	12
Ryr2	1.33858e-57	0.615687	0.982	0.668	2.3065e-53	12
Pcsk2	1.92471e-57	-0.612102	0.33	0.969	3.31647e-53	12
Cdyl2	3.95609e-57	-0.844768	0.541	0.971	6.81674e-53	12
Fam3c	5.90457e-57	-1.07274	0.908	0.992	1.01742e-52	12
Mxra7	8.52236e-57	0.527464	1	0.799	1.46849e-52	12
Pde1a	2.32107e-56	-0.874716	0.202	0.941	3.99944e-52	12
Large	2.96948e-56	0.518374	0.991	0.679	5.11671e-52	12
Cpne9	9.43592e-56	0.451677	0.954	0.429	1.6259e-51	12
Rerg	1.03809e-55	0.484198	0.945	0.418	1.78873e-51	12
Gch1	3.48482e-55	-1.07356	0.945	0.975	6.00469e-51	12
Nr3c1	3.69269e-55	-0.785783	0.697	0.98	6.36287e-51	12
Ajap1	6.43476e-55	-0.742772	0.835	0.995	1.10877e-50	12
Pls3	3.85376e-54	0.577876	1	0.806	6.64042e-50	12
Rab3c	5.01949e-54	0.833176	1	0.994	8.64908e-50	12
Mt3	7.60327e-54	-0.764627	0.982	1	1.31012e-49	12
Kndc1	4.01771e-53	0.561485	1	0.78	6.92292e-49	12
Pcdh10	4.30204e-53	-0.793623	0.275	0.949	7.41285e-49	12
Ralyl	5.35499e-53	0.65095	1	0.994	9.22718e-49	12
Plcb4	5.67008e-53	0.774261	1	0.981	9.77011e-49	12
Atp2b4	1.02053e-52	-0.502672	0.055	0.877	1.75848e-48	12
Arhgdig	1.38792e-52	-0.700714	1	1	2.39153e-48	12
Rab27b	1.72315e-52	-0.54976	0.835	0.989	2.96916e-48	12
Htr1b	4.66393e-52	-0.499216	0.064	0.881	8.03642e-48	12
Col25a1	9.68014e-52	-1.0324	0.229	0.918	1.66798e-47	12
Slc10a4	1.83966e-51	-0.789995	0.844	0.961	3.16991e-47	12
Tmem28	1.94076e-51	0.456192	0.954	0.451	3.34412e-47	12
Gucy1a3	2.42561e-51	-0.822525	0.514	0.954	4.17956e-47	12
Slc6a4	7.46561e-51	-1.09479	1	0.982	1.2864e-46	12
Ntrk3	9.23147e-51	-0.664819	0.872	0.989	1.59067e-46	12
Dach1	2.0092e-50	-0.468627	0.147	0.89	3.46205e-46	12
Zdbf2	2.29591e-50	-0.660106	0.862	0.992	3.95608e-46	12
Slco3a1	3.10902e-50	-0.501763	0.624	0.975	5.35715e-46	12
Lgi2	5.78306e-50	0.61366	0.991	0.844	9.9648e-46	12
Chl1	5.85079e-50	-0.649116	0.817	0.999	1.00815e-45	12
Rimbp2	1.10659e-49	-0.589169	0.927	0.973	1.90676e-45	12
Lrp1b	2.65439e-48	-0.654431	0.633	0.983	4.57379e-44	12
Cadm2	3.03647e-48	-0.803465	0.752	0.976	5.23214e-44	12
Frmpd4	3.73683e-48	-0.520687	0.303	0.91	6.43893e-44	12
Wscd1	6.56904e-48	0.45705	0.954	0.485	1.13191e-43	12
Brinp3	7.2816e-48	-0.493586	0.193	0.884	1.25469e-43	12
Lcorl	7.84192e-48	-0.473611	0.44	0.952	1.35124e-43	12
Rps6ka6	9.12971e-48	0.406652	0.963	0.533	1.57314e-43	12
Fjx1	1.00394e-47	0.636428	0.991	0.546	1.72989e-43	12
Pcyt1b	1.46372e-47	0.350143	0.927	0.482	2.52214e-43	12
Purg	1.73384e-47	0.422236	0.954	0.596	2.98758e-43	12
Pmepa1	2.8218e-47	-0.640346	0.661	0.972	4.86225e-43	12
Cacng3	4.4886e-47	-0.539778	0.404	0.915	7.7343e-43	12
Cyb561	9.57263e-47	-0.409219	0.394	0.919	1.64946e-42	12
Apba2	1.59897e-46	-0.446927	0.385	0.938	2.75519e-42	12
Shisa9	2.78489e-46	-0.387926	0.055	0.824	4.79865e-42	12
Pea15a	3.64859e-46	-0.666182	0.991	1	6.28689e-42	12
Rasgrp1	7.93395e-46	-0.680733	0.092	0.853	1.3671e-41	12
Tpd52	9.60887e-46	-0.480105	0.963	0.991	1.65571e-41	12
Rgs7	1.69077e-45	0.509374	0.991	0.861	2.91337e-41	12
Fut9	1.88005e-45	-0.640844	0.872	0.996	3.23951e-41	12
Tmem176b	2.6121e-45	-0.565784	0.083	0.822	4.5009e-41	12
Id4	9.45591e-45	-0.623056	0.899	0.996	1.62935e-40	12
Gabra2	1.06219e-44	0.61795	1	0.884	1.83026e-40	12
Samd4	1.13151e-44	-0.555626	0.835	0.986	1.9497e-40	12
Mal2	2.1286e-44	-0.549316	0.917	0.985	3.66778e-40	12
Mctp1	7.55157e-44	0.656201	1	0.701	1.30121e-39	12
Ehbp1l1	8.22653e-44	-0.398871	0.44	0.944	1.41751e-39	12
Zeb1	1.6947e-43	-0.350979	0.339	0.915	2.92013e-39	12
Gng5	2.96172e-43	-0.499881	0.927	0.991	5.10333e-39	12
Ptprz1	5.4193e-43	-0.463318	0.266	0.886	9.33799e-39	12
Rap1gds1	6.49957e-43	0.516175	1	0.992	1.11994e-38	12
Pcdh9	7.41839e-43	-0.533294	0.761	0.977	1.27826e-38	12
Sv2b	1.09321e-42	-0.500993	0.624	0.953	1.88371e-38	12
Pcsk5	1.21785e-42	0.449556	0.982	0.806	2.09848e-38	12
Cbln4	8.8708e-42	-0.723685	0.046	0.788	1.52853e-37	12
Fgfr1	2.76549e-41	-0.422853	0.459	0.929	4.76521e-37	12
Lix1	4.52435e-41	0.321175	0.881	0.456	7.7959e-37	12
Ddah1	6.38765e-41	0.466393	1	0.948	1.10066e-36	12
Arhgef15	8.22583e-41	-0.292821	0.183	0.871	1.41739e-36	12
Cdh13	8.65749e-41	-0.942404	0.908	0.965	1.49177e-36	12
Tmsb4x	1.13504e-40	-0.553413	1	1	1.95579e-36	12
Tmem176a	1.76805e-40	-0.453128	0.037	0.763	3.04653e-36	12
Ccdc85a	1.91749e-40	0.416489	1	0.84	3.30403e-36	12
Ndrg2	2.37417e-40	-0.428154	0.44	0.92	4.09094e-36	12
Gstm1	2.53267e-40	-0.419409	0.257	0.9	4.36405e-36	12
Robo2	6.54198e-40	-0.433494	0.404	0.884	1.12725e-35	12
Olfm1	8.30414e-40	-0.498018	0.982	0.999	1.43089e-35	12
Lin7a	8.50145e-40	-0.365709	0.22	0.875	1.46488e-35	12
Ildr2	1.06382e-39	-0.465481	0.468	0.938	1.83306e-35	12
2700029M09Rik	1.32187e-39	0.375657	1	0.997	2.27771e-35	12
Psd3	1.9646e-39	-0.501511	0.486	0.929	3.38521e-35	12
Fgf1	2.24811e-39	0.446674	0.945	0.555	3.87372e-35	12
Syt1	2.91777e-39	-0.429392	1	0.999	5.02762e-35	12
Nxph4	3.27755e-39	-0.617983	0.183	0.799	5.64755e-35	12
Fam184a	4.30602e-39	-0.444667	0.789	0.973	7.41971e-35	12
Dync1i1	4.57095e-39	-0.405151	0.872	0.99	7.87621e-35	12
Fxyd6	6.02221e-39	-0.50068	1	0.999	1.03769e-34	12
Lingo2	6.81477e-39	-0.358589	0.266	0.851	1.17425e-34	12
Slc6a1	9.62315e-39	-0.432098	0.064	0.771	1.65817e-34	12
Syt13	1.70984e-38	-0.432207	0.936	0.995	2.94623e-34	12
Diras2	2.30985e-38	-0.409235	0.477	0.898	3.98011e-34	12
Pgap1	4.07348e-38	-0.435293	0.908	0.988	7.01902e-34	12
Cpne5	4.7286e-38	-0.558521	0.376	0.888	8.14785e-34	12
Tenm4	5.5119e-38	0.457901	0.936	0.688	9.49755e-34	12
Arid5b	9.19715e-38	0.284745	0.881	0.471	1.58476e-33	12
Dnajc12	1.04861e-37	0.446928	1	0.996	1.80685e-33	12
S100a10	1.16384e-37	-0.688535	0.881	0.975	2.00541e-33	12
Robo1	1.27471e-37	-0.327192	0.092	0.775	2.19646e-33	12
Alcam	1.57536e-37	-0.5027	0.092	0.771	2.7145e-33	12
Ube2ql1	3.47907e-37	-0.453612	0.881	0.991	5.99479e-33	12
Cuta	4.62362e-37	0.393036	0.991	0.977	7.96697e-33	12
Fstl5	5.00713e-37	-0.461733	0.028	0.724	8.62779e-33	12
Zwint	5.39556e-37	-0.33378	1	1	9.2971e-33	12
Tspan7	5.93965e-37	-0.441436	1	1	1.02346e-32	12
En2	6.56398e-37	-0.342808	0.119	0.783	1.13104e-32	12
Cav2	6.5926e-37	0.305963	0.89	0.494	1.13597e-32	12
Bmpr2	1.31535e-36	-0.46026	0.954	0.996	2.26648e-32	12
1810041L15Rik	1.78086e-36	-0.332856	0.193	0.808	3.06859e-32	12
Crip2	1.82312e-36	-0.553062	0.798	0.951	3.14142e-32	12
Ppp1r14c	2.01023e-36	0.472686	0.982	0.936	3.46382e-32	12
Vsnl1	2.05287e-36	-1.15036	0.982	0.996	3.5373e-32	12
Slc2a13	3.04223e-36	-0.355836	0.56	0.944	5.24206e-32	12
Enah	3.07663e-36	0.391639	1	0.996	5.30135e-32	12
Tmem158	4.52211e-36	-0.620185	0.963	0.988	7.79205e-32	12
Hpcal1	7.13492e-36	-0.514059	0.716	0.967	1.22942e-31	12
Cpne6	1.12599e-35	0.33869	0.908	0.463	1.9402e-31	12
Crim1	1.47376e-35	0.299938	0.862	0.391	2.53943e-31	12
Hmgb3	1.63548e-35	-0.364972	0.55	0.939	2.81809e-31	12
Rbms1	1.66974e-35	0.406618	1	0.712	2.87713e-31	12
Khdrbs2	1.78286e-35	0.314823	0.908	0.436	3.07204e-31	12
Hcrtr1	2.36333e-35	-0.49058	0.064	0.732	4.07225e-31	12
Gnai1	2.44265e-35	0.43542	1	0.997	4.20893e-31	12
Ctxn2	2.70966e-35	-0.4121	0.982	1	4.66902e-31	12
Tmem114	3.19464e-35	-0.697584	0.211	0.779	5.50468e-31	12
Pts	3.36369e-35	-0.416811	0.991	0.991	5.79598e-31	12
Laptm4a	5.83475e-35	0.405751	1	0.983	1.00539e-30	12
Plppr5	7.32079e-35	0.373555	0.991	0.838	1.26145e-30	12
Ank	8.3985e-35	-0.382105	0.651	0.954	1.44715e-30	12
Zbtb38	1.23932e-34	0.364684	0.982	0.94	2.13548e-30	12
Cbln2	2.37852e-34	0.427156	0.991	0.478	4.09843e-30	12
Cib2	2.73999e-34	-0.388251	0.936	0.994	4.72128e-30	12
Ptprm	4.11451e-34	-0.377839	0.624	0.937	7.08971e-30	12
Tuba1a	5.63234e-34	-0.443886	1	1	9.70509e-30	12
Pcdh17	5.80745e-34	-0.662091	0.431	0.884	1.00068e-29	12
Atf4	7.73984e-34	0.361999	1	0.988	1.33365e-29	12
Tmem255a	8.40793e-34	-0.689313	0.853	0.925	1.44877e-29	12
Kcnd3	1.27142e-33	0.382079	0.963	0.837	2.19079e-29	12
Tm6sf1	2.42268e-33	0.281151	0.917	0.606	4.17453e-29	12
Zfhx4	2.48267e-33	0.397058	0.991	0.931	4.2779e-29	12
Cachd1	2.55519e-33	-0.340365	0.248	0.822	4.40284e-29	12
Mpc2	3.70152e-33	0.297233	1	0.999	6.37809e-29	12
Rgs7bp	4.08525e-33	0.409638	1	0.95	7.03929e-29	12
Kcnab1	5.57275e-33	-0.399278	0.119	0.728	9.60241e-29	12
Tle4	5.62961e-33	-0.347977	0.505	0.907	9.70038e-29	12
Mrps33	6.36466e-33	0.307319	1	0.999	1.09669e-28	12
Atp1b1	1.62061e-32	-0.306436	1	1	2.79247e-28	12
Rab6b	1.85919e-32	-0.338757	1	1	3.20358e-28	12
Arl14ep	2.77354e-32	0.282688	0.927	0.701	4.77909e-28	12
Slc7a1	2.80574e-32	-0.334403	0.67	0.92	4.83457e-28	12
Fndc3a	5.96117e-32	-0.334104	0.872	0.982	1.02717e-27	12
Cacna1e	6.77755e-32	-0.471081	0.78	0.96	1.16784e-27	12
Higd1a	7.45277e-32	-0.33795	1	1	1.28419e-27	12
Ndufb9	7.56835e-32	0.309675	1	1	1.3041e-27	12
Gpx3	7.77021e-32	-0.474541	0.248	0.808	1.33888e-27	12
Rbfox3	8.17338e-32	0.354822	1	0.994	1.40836e-27	12
Zdhhc2	9.31225e-32	-0.342894	0.587	0.925	1.60459e-27	12
Gchfr	9.46666e-32	-0.454495	1	0.996	1.6312e-27	12
Ctnnd2	1.35799e-31	-0.375262	0.862	0.985	2.33995e-27	12
Rnf150	1.63976e-31	-0.319335	0.404	0.88	2.82547e-27	12
Cryba2	1.72109e-31	0.411479	1	0.987	2.96562e-27	12
Zfhx3	2.29664e-31	0.377868	1	0.96	3.95735e-27	12
Ndufa13	2.66702e-31	0.366309	1	1	4.59553e-27	12
Grip1	3.14174e-31	0.26565	0.862	0.497	5.41353e-27	12
Prmt2	4.11261e-31	0.320649	1	1	7.08644e-27	12
Sorl1	4.39232e-31	-0.360879	0.743	0.957	7.56841e-27	12
Klhl13	6.163e-31	0.346277	0.954	0.662	1.06195e-26	12
Iqsec3	6.3934e-31	0.346209	0.982	0.875	1.10165e-26	12
Qpct	9.52095e-31	-0.394005	0.853	0.983	1.64056e-26	12
Aldoc	1.03458e-30	-0.59104	0.982	0.996	1.78268e-26	12
Rims1	1.05298e-30	0.354382	0.972	0.933	1.81439e-26	12
Tspyl4	1.25986e-30	0.288658	1	1	2.17086e-26	12
Rasgef1a	1.26011e-30	-0.329452	0.752	0.983	2.17129e-26	12
Cpne7	1.67878e-30	-0.5626	0.89	0.926	2.8927e-26	12
Scn3b	2.34124e-30	-0.377677	0.844	0.988	4.0342e-26	12
Sema6a	2.74756e-30	0.364144	0.936	0.605	4.73432e-26	12
Actg1	2.97737e-30	-0.251347	1	1	5.1303e-26	12
Atp8a1	3.61405e-30	0.376077	1	0.998	6.22738e-26	12
Fstl1	4.06329e-30	-0.452476	0.697	0.912	7.00145e-26	12
Nrsn1	4.29199e-30	-0.394186	1	0.995	7.39553e-26	12
2700094K13Rik	4.5828e-30	0.32638	1	0.995	7.89662e-26	12
Pcsk6	5.47766e-30	-0.356834	0.028	0.64	9.43856e-26	12
Rasgrf1	5.52719e-30	-0.379238	1	0.997	9.5239e-26	12
Tmem150c	6.33511e-30	-0.323048	0.642	0.942	1.0916e-25	12
Slc18a2	7.77207e-30	-0.45317	1	0.992	1.33921e-25	12
Tceal8	1.00401e-29	0.341341	0.991	0.966	1.73001e-25	12
Ncald	1.03415e-29	-0.353965	1	0.999	1.78194e-25	12
Stk32c	1.07662e-29	0.342028	1	0.939	1.85513e-25	12
B3galt1	1.30056e-29	-0.274732	0.156	0.748	2.24099e-25	12
Sphkap	1.59402e-29	-0.339696	0.064	0.672	2.74666e-25	12
Pantr1	2.04748e-29	-0.363465	0.147	0.723	3.52801e-25	12
Arpc1a	2.28046e-29	0.352401	1	0.999	3.92945e-25	12
Plxnc1	2.79838e-29	0.356242	0.972	0.836	4.82189e-25	12
Ctxn1	2.82797e-29	-0.434458	0.945	0.988	4.87288e-25	12
Car10	3.17056e-29	-0.462179	0.78	0.945	5.46319e-25	12
Dbp	3.45723e-29	0.326077	0.899	0.598	5.95715e-25	12
Scamp1	3.53278e-29	-0.37538	0.991	0.997	6.08733e-25	12
H3f3a	3.69805e-29	0.365116	1	0.994	6.37211e-25	12
Lrrc4c	4.04991e-29	-0.289217	0.459	0.871	6.97841e-25	12
Klf7	4.32387e-29	-0.3597	0.963	0.983	7.45046e-25	12
Gsta4	4.96777e-29	-0.343493	0.083	0.681	8.55996e-25	12
St8sia2	5.45681e-29	-0.314708	0.028	0.631	9.40264e-25	12
Cntn1	6.39375e-29	0.325662	1	1	1.10171e-24	12
Manea	6.80539e-29	-0.304795	0.541	0.888	1.17264e-24	12
Tceal6	7.00278e-29	0.342305	1	0.975	1.20665e-24	12
Sh3bgrl3	9.66453e-29	-0.358389	1	1	1.66529e-24	12
Lrrtm3	9.78922e-29	0.322299	1	0.96	1.68678e-24	12
Thy1	2.0504e-28	0.410326	1	0.726	3.53305e-24	12
Vstm2a	2.13423e-28	0.415143	1	0.967	3.67749e-24	12
S100a11	3.21975e-28	-0.430501	0.239	0.752	5.54795e-24	12
Il1r1	3.92014e-28	-0.301828	0.092	0.681	6.75479e-24	12
Rims2	5.30354e-28	0.277116	0.963	0.832	9.13854e-24	12
Gpm6b	5.36315e-28	-0.328405	0.183	0.73	9.24124e-24	12
Lypd1	5.99971e-28	0.502436	1	0.845	1.03381e-23	12
Spint2	6.23066e-28	-0.374475	0.688	0.962	1.07361e-23	12
App	6.27605e-28	-0.321268	1	1	1.08143e-23	12
As3mt	6.71964e-28	-0.350741	0.706	0.95	1.15786e-23	12
Creg2	7.62244e-28	-0.321257	0.817	0.961	1.31342e-23	12
Pax5	9.23342e-28	-0.36808	0.018	0.606	1.59101e-23	12
Arf3	1.24061e-27	-0.307607	1	1	2.13769e-23	12
RP23-407N2.2	1.3441e-27	0.318298	0.991	0.992	2.31603e-23	12
Ctnnbip1	1.56638e-27	-0.328085	0.991	0.996	2.69903e-23	12
Elovl5	2.12725e-27	-0.267015	0.541	0.898	3.66546e-23	12
Lrpap1	4.86091e-27	-0.365972	0.982	0.997	8.37584e-23	12
Ntm	4.86217e-27	0.446133	0.991	0.836	8.378e-23	12
Saraf	5.73131e-27	-0.287402	1	1	9.87561e-23	12
Guk1	6.02608e-27	-0.279284	1	1	1.03835e-22	12
Fkbp1b	6.53119e-27	-0.326737	0.936	0.971	1.12539e-22	12
Cask	1.28444e-26	0.346668	0.991	0.943	2.21321e-22	12
Palm2	1.55583e-26	-0.278335	0.569	0.906	2.68086e-22	12
Mif	1.73255e-26	0.333971	1	0.998	2.98535e-22	12
Fam81a	2.06992e-26	-0.252681	0.358	0.825	3.56668e-22	12
Calb1	2.89298e-26	-0.603822	0.33	0.801	4.98489e-22	12
1700037H04Rik	3.25516e-26	-0.314364	0.798	0.95	5.60896e-22	12
Sf3b5	3.29521e-26	0.274265	0.982	0.978	5.67797e-22	12
Spock1	3.56584e-26	-0.357209	0.651	0.9	6.1443e-22	12
Tns1	6.19931e-26	-0.341656	0.853	0.95	1.0682e-21	12
Cplx2	6.4364e-26	-0.57407	1	0.986	1.10906e-21	12
Fez1	7.06346e-26	0.304001	0.991	0.994	1.21711e-21	12
B630019K06Rik	7.17273e-26	-0.313785	0.991	1	1.23593e-21	12
Prmt8	7.26055e-26	-0.375803	0.22	0.71	1.25107e-21	12
Naa20	9.6933e-26	0.292555	1	0.961	1.67025e-21	12
Elmod1	1.15617e-25	-0.386442	0.982	0.987	1.99221e-21	12
Tph2	1.42411e-25	-0.462081	1	0.995	2.45389e-21	12
B2m	1.71633e-25	-0.276461	0.33	0.795	2.95741e-21	12
Map4	1.73862e-25	-0.30733	1	0.999	2.99582e-21	12
Ogfrl1	1.85362e-25	-0.283503	0.826	0.961	3.19397e-21	12
Lyrm4	1.87121e-25	0.262012	0.972	0.841	3.22428e-21	12
Mrpl36	2.31036e-25	0.296008	0.982	0.955	3.98098e-21	12
Dicer1	2.56569e-25	0.316471	0.972	0.867	4.42095e-21	12
Adgrl2	4.73097e-25	-0.316014	0.073	0.624	8.15194e-21	12
Fndc5	5.01265e-25	-0.313186	0.606	0.916	8.6373e-21	12
Ggct	5.24569e-25	-0.321033	0.789	0.945	9.03884e-21	12
Sfxn1	5.3353e-25	0.28875	0.991	0.997	9.19325e-21	12
Olfm3	5.74697e-25	-0.27195	0.239	0.764	9.9026e-21	12
Ube2e2	5.76989e-25	-0.332337	0.991	0.996	9.9421e-21	12
Fam19a2	5.91511e-25	-0.388347	0.028	0.575	1.01923e-20	12
Timm13	6.6016e-25	0.273519	1	0.999	1.13752e-20	12
Nptx1	7.06987e-25	-0.272413	0.073	0.609	1.21821e-20	12
Commd8	8.10701e-25	0.272651	1	0.971	1.39692e-20	12
Mt1	8.87748e-25	0.303215	0.936	0.556	1.52968e-20	12
Plch1	8.91229e-25	-0.259494	0.165	0.677	1.53568e-20	12
Nyap2	9.45984e-25	-0.387008	0.716	0.901	1.63003e-20	12
Rps6ka2	1.07767e-24	-0.288374	0.385	0.821	1.85694e-20	12
Opcml	1.40576e-24	0.360353	1	0.988	2.42227e-20	12
Fam171b	2.11802e-24	0.277396	1	0.998	3.64955e-20	12
Anxa5	2.71127e-24	-0.335612	0.807	0.933	4.67179e-20	12
Asb4	3.4126e-24	-1.05632	0.092	0.61	5.88025e-20	12
Amigo2	4.57307e-24	-0.507756	0.578	0.846	7.87985e-20	12
Ankrd6	5.0661e-24	-0.276908	0.624	0.918	8.72939e-20	12
Ap3s1	5.61926e-24	-0.28432	0.982	0.995	9.68254e-20	12
Galnt1	5.70705e-24	0.302144	0.963	0.897	9.83381e-20	12
Prkcq	5.72867e-24	-0.420767	0.037	0.565	9.87107e-20	12
Myh7	6.28214e-24	-0.37385	0.275	0.734	1.08248e-19	12
Lingo1	7.53646e-24	0.256429	0.963	0.789	1.29861e-19	12
Npm1	1.05392e-23	0.261544	1	1	1.81601e-19	12
Ppia	1.09563e-23	0.338926	1	1	1.88788e-19	12
Nxn	1.09951e-23	-0.257951	0.367	0.776	1.89457e-19	12
Ctsl	1.1207e-23	-0.603397	0.954	0.991	1.93108e-19	12
Bag4	1.45487e-23	0.280787	1	0.963	2.50688e-19	12
Arl6ip1	1.91683e-23	-0.26874	1	1	3.30289e-19	12
Snhg11	1.9966e-23	0.36234	1	1	3.44034e-19	12
Syt4	1.99951e-23	-0.370685	1	1	3.44535e-19	12
Tbc1d9	2.43538e-23	-0.268641	0.927	0.979	4.1964e-19	12
Nrcam	3.51148e-23	-0.337647	0.908	0.963	6.05063e-19	12
Sorcs1	5.53415e-23	-0.391992	0.651	0.889	9.53589e-19	12
H2afz	6.05317e-23	0.276726	1	1	1.04302e-18	12
Tusc3	7.27187e-23	-0.35102	0.982	0.996	1.25302e-18	12
Rcan3	7.50274e-23	-0.284304	0.945	0.982	1.2928e-18	12
Dzank1	9.39575e-23	-0.276522	0.963	0.997	1.61898e-18	12
Chd6	9.65273e-23	0.295484	0.972	0.983	1.66326e-18	12
Lsamp	1.00146e-22	0.364091	1	0.996	1.72561e-18	12
Tmem163	1.01478e-22	-0.338216	0.615	0.884	1.74857e-18	12
Lrrc58	1.05131e-22	-0.283801	0.972	0.987	1.81151e-18	12
Tcaf1	1.49775e-22	-0.264647	1	1	2.58077e-18	12
Gde1	1.67756e-22	-0.25871	1	0.999	2.89061e-18	12
Timp2	1.74088e-22	-0.273228	1	1	2.99972e-18	12
Wfdc12	2.24411e-22	-0.512898	0.541	0.805	3.86682e-18	12
Oxct1	2.4609e-22	-0.311274	0.908	0.988	4.24037e-18	12
Chd5	2.53763e-22	-0.287898	0.982	0.998	4.37259e-18	12
Luzp2	2.97418e-22	-0.358481	0.183	0.668	5.12481e-18	12
S100a16	4.35848e-22	-0.311511	0.294	0.749	7.5101e-18	12
Bend5	4.6796e-22	-0.2574	0.532	0.874	8.06341e-18	12
Nptxr	4.70267e-22	-0.276161	0.89	0.973	8.10318e-18	12
Chn2	5.19991e-22	-0.419935	0.725	0.89	8.95996e-18	12
Gad2	6.13303e-22	-0.711982	0.174	0.618	1.05678e-17	12
Rgs2	7.12208e-22	-0.643921	0.945	0.953	1.22721e-17	12
Pcbd1	8.04557e-22	-0.321741	0.991	0.984	1.38633e-17	12
Vat1	8.74072e-22	-0.307417	1	0.997	1.50611e-17	12
Smim1	1.01483e-21	-0.319725	0.615	0.912	1.74866e-17	12
Jund	1.27236e-21	-0.430525	0.991	1	2.1924e-17	12
Sparcl1	1.2961e-21	0.380265	1	0.87	2.23331e-17	12
Prkcb	1.72368e-21	-0.395848	0.872	0.943	2.97008e-17	12
Ap2a2	1.76397e-21	-0.278947	0.991	0.998	3.0395e-17	12
Gnas	2.57126e-21	-0.294663	1	1	4.43054e-17	12
Slc7a14	2.70103e-21	0.252629	1	0.968	4.65415e-17	12
Slc17a8	2.71418e-21	0.445983	1	0.618	4.6768e-17	12
Syngr3	3.24848e-21	-0.255459	0.991	1	5.59746e-17	12
Psmg4	3.58021e-21	0.26647	0.991	0.924	6.16906e-17	12
AI504432	4.30586e-21	-0.251779	0.706	0.937	7.41943e-17	12
Mrap2	4.54812e-21	0.291795	0.991	0.926	7.83686e-17	12
Rpp25	5.25941e-21	0.302255	0.908	0.788	9.0625e-17	12
Smim10l1	7.79978e-21	0.268447	0.991	0.999	1.34398e-16	12
Prph	8.09908e-21	-0.685849	0.147	0.598	1.39555e-16	12
Atp6v0b	8.35194e-21	0.261767	1	1	1.43912e-16	12
Scn1b	1.50138e-20	0.260321	1	0.971	2.58703e-16	12
Bcl9	1.60046e-20	0.253493	0.963	0.882	2.75775e-16	12
1500009L16Rik	2.17273e-20	0.250571	0.936	0.753	3.74383e-16	12
Actr3b	2.47269e-20	0.270303	0.89	0.749	4.2607e-16	12
Tagln3	3.81833e-20	0.268341	0.991	0.996	6.57937e-16	12
Lamtor4	5.73032e-20	0.286611	1	0.978	9.87392e-16	12
Cystm1	5.75186e-20	-0.285792	0.982	0.998	9.91103e-16	12
Mapk3	9.2663e-20	-0.273686	0.908	0.989	1.59668e-15	12
Tmem191c	9.31526e-20	0.2809	1	0.983	1.60511e-15	12
AY036118	9.77101e-20	0.315224	0.963	0.787	1.68364e-15	12
Coq7	1.19747e-19	0.269636	1	0.966	2.06337e-15	12
Pcp4	1.39206e-19	-0.554541	0.991	0.998	2.39866e-15	12
Cdk17	1.48519e-19	-0.253793	0.716	0.924	2.55913e-15	12
Vstm2l	1.52349e-19	-0.334364	0.532	0.84	2.62513e-15	12
Maged2	1.58532e-19	0.264474	0.982	0.938	2.73167e-15	12
Caly	1.70993e-19	0.271441	1	0.999	2.94639e-15	12
Suclg1	2.27905e-19	0.26059	0.991	0.983	3.92703e-15	12
Rprm	2.72787e-19	-0.527602	0.101	0.553	4.7004e-15	12
Ndufb6	2.85599e-19	0.264626	1	0.994	4.92116e-15	12
Fry	3.25212e-19	-0.279102	1	0.996	5.60373e-15	12
Marcksl1	4.95772e-19	0.346553	0.963	0.744	8.54265e-15	12
Tmem50b	6.67808e-19	-0.251383	0.908	0.974	1.1507e-14	12
Btbd3	7.21241e-19	-0.286319	0.56	0.839	1.24277e-14	12
Faim2	1.80133e-18	-0.307575	0.991	1	3.10386e-14	12
Ndufa12	2.56519e-18	0.2525	1	0.999	4.42009e-14	12
Sh3bp5	2.78197e-18	0.259416	1	0.931	4.79361e-14	12
Armcx3	2.80215e-18	-0.256628	0.972	0.978	4.82839e-14	12
Pdyn	2.9296e-18	-0.401098	0.046	0.49	5.048e-14	12
Cox7b	2.94449e-18	0.261729	1	0.998	5.07366e-14	12
Celf6	3.38337e-18	-0.283335	1	0.997	5.82988e-14	12
Rgs17	4.48939e-18	0.291963	1	0.997	7.73567e-14	12
Tppp3	4.70505e-18	-0.291965	0.991	0.992	8.10727e-14	12
Pcsk1n	5.00983e-18	-0.381154	1	1	8.63243e-14	12
Flywch1	5.08658e-18	0.254312	1	0.999	8.76468e-14	12
Igfbp5	5.13117e-18	-0.308061	0.44	0.749	8.84152e-14	12
Zfos1	5.22361e-18	0.297072	1	0.992	9.0008e-14	12
Frmd4b	5.48537e-18	0.255678	0.89	0.708	9.45185e-14	12
Nsmce4a	9.74532e-18	0.277276	0.982	0.941	1.67922e-13	12
Arhgap36	1.2797e-17	-0.741489	0.119	0.538	2.20505e-13	12
Arhgap24	1.34618e-17	-0.260499	0.679	0.918	2.3196e-13	12
Gata2	1.74734e-17	-0.283101	0.927	0.964	3.01085e-13	12
Ndufs8	2.03905e-17	0.255813	1	0.986	3.51349e-13	12
Nnat	2.4099e-17	-0.415026	0.514	0.846	4.15249e-13	12
AW551984	3.29928e-17	-0.272113	0.954	0.994	5.68499e-13	12
Fam63b	3.94927e-17	-0.274036	0.963	0.978	6.80499e-13	12
Nell2	7.56632e-17	-0.26791	0.394	0.772	1.30375e-12	12
Nhsl2	1.235e-16	0.262379	0.991	0.925	2.12802e-12	12
Nrxn3	1.56319e-16	-0.532589	0.55	0.782	2.69353e-12	12
Acly	2.39419e-16	-0.256322	0.991	0.987	4.12543e-12	12
Dlk1	4.25653e-16	-1.20589	0.33	0.673	7.33443e-12	12
Chchd10	5.21227e-16	-0.258452	0.991	1	8.98126e-12	12
Mgat4c	6.71538e-16	0.27072	0.991	0.95	1.15713e-11	12
Pbx1	7.41329e-16	-0.369044	1	0.993	1.27738e-11	12
Pclo	9.59538e-16	-0.281317	1	0.999	1.65338e-11	12
Atrx	1.06156e-15	0.261244	0.982	0.97	1.82917e-11	12
Vat1l	1.78149e-15	-0.31993	1	0.988	3.06968e-11	12
Srgap1	2.35199e-15	0.257553	0.991	0.923	4.05272e-11	12
Snrpd1	2.64052e-15	0.250773	0.991	0.992	4.54989e-11	12
Gm42418	3.19336e-15	0.335446	1	1	5.50249e-11	12
Enho	3.74995e-15	-0.251347	1	0.996	6.46154e-11	12
Frmpd3	5.58264e-15	-0.261019	0.743	0.864	9.61945e-11	12
Gabra1	7.61666e-15	-0.308805	0.284	0.63	1.31243e-10	12
Pak3	9.113e-15	-0.266416	1	0.999	1.57026e-10	12
Slc5a5	2.36269e-14	-0.251642	0.789	0.888	4.07114e-10	12
Dcaf17	3.45134e-14	0.408899	0.807	0.629	5.94701e-10	12
Ret	6.12674e-14	-0.300162	0.073	0.436	1.0557e-09	12
Hsp90aa1	8.29892e-14	-0.26091	1	1	1.42999e-09	12
Ldha	1.28258e-13	-0.283285	1	0.999	2.21001e-09	12
Pfn1	2.84126e-13	0.279279	0.991	0.993	4.89578e-09	12
Tenm2	4.49075e-13	-0.330742	0.862	0.909	7.73801e-09	12
Clic1	6.68249e-13	-0.263438	0.064	0.417	1.15146e-08	12
Phlda1	6.81294e-13	-0.317338	0.541	0.812	1.17394e-08	12
Chgb	9.17063e-13	0.284927	1	0.999	1.58019e-08	12
Ptprt	1.22729e-12	-0.340311	0.862	0.919	2.11475e-08	12
Vwc2	2.77983e-12	-0.292638	0.725	0.842	4.78992e-08	12
Rbfox1	3.39687e-12	-0.274871	0.514	0.782	5.85314e-08	12
Lypd6	3.62927e-12	0.255139	0.908	0.782	6.2536e-08	12
Serpine2	6.85087e-12	-0.345506	0.606	0.807	1.18047e-07	12
Fam46a	9.91603e-12	-0.273577	0.165	0.502	1.70863e-07	12
Cxcl14	1.05619e-11	-0.292903	0.028	0.351	1.81992e-07	12
Gad1	6.94258e-11	-0.414912	0.018	0.314	1.19628e-06	12
Serpini1	1.18627e-10	-0.267333	0.771	0.936	2.04407e-06	12
Rspo3	1.60656e-10	-0.296099	0.073	0.369	2.76826e-06	12
Gm26917	1.45441e-08	0.293013	0.963	0.932	0.00025061	12
Crip1	1.51611e-08	-0.308252	0.202	0.461	0.000261241	12
Rgs10	7.49068e-08	-0.623764	0.541	0.654	0.00129072	12
Hs3st4	9.062e-08	-0.411285	0.422	0.545	0.00156147	12
Pcdh11x	6.02078e-06	-0.264463	0.193	0.392	0.103744	12
Crct1	1.39915e-05	0.260614	0.596	0.432	0.241087	12
Epha5	2.38393e-05	-0.328654	0.807	0.863	0.410775	12
Slamf1	7.26933e-05	-0.250264	0.101	0.274	1	12
Nxph1	0.000167368	-0.320668	0.624	0.686	1	12
Pcdh7	0.000583492	-0.264889	0.706	0.701	1	12
Kctd8	1.48898e-133	1.20125	0.91	0.167	2.56565e-129	13
Nppc	3.20508e-122	0.375646	0.521	0.036	5.52267e-118	13
Bmp3	1.15009e-116	0.338826	0.34	0.009	1.98172e-112	13
Hs3st2	2.80197e-114	0.390657	0.639	0.069	4.82808e-110	13
Nptx2	1.81586e-113	0.722126	0.646	0.073	3.12891e-109	13
Nfib	2.52531e-111	0.69226	0.646	0.076	4.35136e-107	13
Sulf2	5.08307e-107	0.520925	0.833	0.171	8.75863e-103	13
Plpp4	2.84965e-104	0.415197	0.674	0.093	4.91022e-100	13
Erbb4	2.85195e-80	0.660559	0.951	0.335	4.91419e-76	13
Thsd7b	5.68838e-80	0.356466	0.583	0.09	9.80164e-76	13
Ldb2	6.48358e-79	0.368843	0.625	0.107	1.11719e-74	13
Pea15a	1.10514e-78	-0.978772	0.993	1	1.90426e-74	13
Cnr1	4.69645e-78	0.526937	0.806	0.214	8.09245e-74	13
Ngfrap1	5.52281e-78	-0.760816	1	1	9.51636e-74	13
Slc18a2	2.16234e-77	-1.53062	0.882	1	3.72593e-73	13
Tph2	6.62003e-76	-1.62571	0.924	1	1.1407e-71	13
Htr2c	6.16669e-75	0.75457	0.611	0.112	1.06258e-70	13
Ngef	1.58282e-74	0.268856	0.521	0.074	2.72736e-70	13
Gch1	6.46991e-74	-1.12051	0.653	0.995	1.11483e-69	13
Slc6a4	1.02576e-73	-1.59504	0.736	0.999	1.76748e-69	13
Nova1	1.52644e-73	0.528292	0.931	0.451	2.63021e-69	13
Rps2	2.04858e-71	-0.594547	1	1	3.5299e-67	13
Cpne7	2.9156e-71	-0.894926	0.333	0.963	5.02386e-67	13
Zfp536	3.07598e-70	0.293419	0.694	0.156	5.30023e-66	13
Slc10a4	9.18356e-68	-0.899793	0.444	0.989	1.58242e-63	13
Cntn1	1.14803e-67	-0.786474	1	1	1.97818e-63	13
Reep5	7.073e-66	-0.539186	0.993	1	1.21875e-61	13
[truncated: 1,070 more rows]

## Sheet: sig_var_genes
gene symbol
Sst
S100b
Calb2
Slamf1
Atg2a
Gm26737
Nts
Penk
Dlk1
Nos1
A330069E16Rik
Arhgap36
Trh
Gm26710
Gm15879
Crh
Zeb2
Ccnb1
Ctla2a
Pdyn
Asb4
Exosc2
Rep15
Tac1
Dqx1
Gad1
Sln
Cenpf
Irgm1
Rgs10
Cpne9
Crip1
Rorb
Crct1
Prph
Pcp4l1
Cited1
Rprm
C1ql1
Slc17a8
B230312C02Rik
Maf
Met
Cxcl14
Xist
Rspo3
Vgf
Gad2
Mgarp
Utrn
Ntng1
Gm43409
Npas1
Necab1
Gm8730
Nrgn
1700042O10Rik
Tpbg
Ccdc163
Gm16222
Cbln2
Dcaf17
Emilin1
Hspb1
Kctd8
Lepr
Spp1
Gm609
Myo1c
Ctsl
Calcr
Evx1os
Clic1
Lockd
Nr2f2
Ret
Chaf1b
Fam46a
Calb1
Pcdh11x
Stxbp2
Ptcra
Mctp1
Gal
Rgs2
Pcp4
Nxph1
RP23-4H17.3
Fst
Gm26664
BC028528
Crym
Mt1
Tc2n
Amigo2
Nptx2
Sostdc1
Gm7120
Rbp1
Nnat
C730034F03Rik
Gm28578
Lypd1
Nrxn3
Agl
Cxcl12
Adgrl2
Hs3st4
Cldn5
Ifi27
Loxl2
Nmrk1
Rgs5
BC048546
Col11a1
Htr2c
Adcyap1
Serpine2
Synpr
Grp
Gsta4
Vim
Fjx1
Nfib
Slc32a1
Ecel1
Calca
Pou3f2
Sema5a
Col25a1
Gm26772
Cx3cr1
Sema3c
Rasgrp1
Pcdh7
Fam83a
Slc5a7
BC026585
Flt1
Abhd11os
Syt2
Parp1
Cmbl
RP23-291B1.2
Pdlim2
Sycp3
Prkcq
Mgll
Satb1
Gm10425
Nbl1
Mirt1
Peg10
Pcdh19
Tmem114
Gabrq
Wnt4
Nefl
Zc3h12a
Pdlim5
Ddit4l
Phlda1
Wnt5a
Gm8797
Hcn1
Epha5
Nfix
Tmeff2
Emilin2
Caln1
Cacng5
Syndig1
Sema3e
Rmst
Pam
Nhsl1
Xlr3a
Elmo1
Cbln4
Hcrtr1
Fam19a2
Wfdc12
Npy2r
Ly6c1
Tapbpl
Cd24a
Erdr1
9130230L23Rik
Gda
Gpr101
Zar1
Gm16630
Smoc2
Adcy2
Rxfp1
Fam114a1
Gng11
Erbb4
Cd59a
Sparcl1
Nrp2
Kit
Slco1a4
Tacr3
Galr1
Spock3
Acp6
Ubb
S100a11
P3h3
Lpar1
Retn
AY036118
Egr1
Adgrl4
Pld1
Slit2
Tulp3
Pou3f1
H2-Q2
Gpc5
Alcam
Fam3c
Xlr3b
Nell1
Slc1a2
Gabra1
Parvb
Gm26870
Cd63
Klf2
Parm1
Gabrg3
Gm13889
Ntm
Ptgis
Vdr
Bmp3
Vsnl1
Fgf13
Ly6a
Pcdh15
Lgals1
Vstm2l
Bcl11a
Resp18
Fam210b
Cnr1
Irx2
Thy1
Rasgrf2
Ebf1
Nefm
Gpx3
Cpne4
Cpe
Rbfox1
Chrm2
Grm5
C1ql3
Gng13
Cd36
Rapsn
Sepp1
Tcf4
Fdps
Plcb4
Zbtb20
Cacna2d3
5031425F14Rik
Tshz2
Golga3
Tecrl
Lmo1
Gria3
Fgf1
Fbxo2
Arpp21
Igfbp7
Bdnf
Oasl2
Junb
Cst3
Stxbp6
Gm10827
Syndig1l
Tmem255a
Cdh13
Necab2
Plxna4
Alpk2
Slc30a3
Pax5
Fstl5
Ctsz
Nkx6-1
Bcl11b
Peli2
Luzp2
Synm
Slc6a1
Rab3b
Tnnt1
Pde1a
Sox17
6330403A02Rik
RP24-445D7.2
Egr4
2010005H15Rik
Pltp
Sncg
Tcf24
Tox3
Kcnab1
Cdc42ep5
AI662270
Slc6a5
Crtac1
Gm36266
Cadm2
Rspo1
Hpgds
Sphkap
S1pr3
Prlr
Serpini1
Myh7
Aldoc
Hnf1aos1
Marcksl1
A230065H16Rik
Sfrp1
Thap1
Kcnq3
Kcna4
Gpr88
Nppc
A830018L16Rik
Chga
Sema6a
Creb3l1
Chgb
Fos
Cpne5
Ddx3y
Aldh3b2
Evx1
Npr1
Ap1s2
Gpm6b
Sparc
Kcnd2
Id2
Pcdh17
S100a3
Ramp3
Fgf9
Ebf2
Haus8
Fam163b
Nrn1
Chn2
Maob
Cxcr2
Pycr2
Bpifc
Pgm2l1
B930036N10Rik
Pnoc
Igfbp5
Spon1
Prkcb
Tmem28
Gm16638
St8sia2
Pou6f2
Anxa3
Grin3a
Plp1
Slc17a6
Shox2
Mal
Hs3st1
Unc5c
Mbl2
Prkce
Spag5
Dkk3
Nxph4
Pcdh10
Hcrtr2
Pirb
Irx1
Mef2c
Car4
Ptpn7
Pcsk6
Psmb2
Cplx1
Arap3
Epha4
Crhr2
Gfra1
Ifi27l2a
Tspo
C330021F23Rik
Gm16755
Grm1
Itm2a
Laptm5
Epas1
Tmem30c
S100a16
Cdyl2
Hspa1a
S100a6
Grin2a
Syce1
Nptx1
Rerg
Tmem176b
March1
mt-Nd5
Lancl3
Rbp7
Slco1c1
Prokr1
mt-Nd3
Prmt8
Tph2
Jun
Cplx2
Hs3st5
Dynlrb2
Gm26917
Rfx4
Hist1h2bc
Moxd1
Ptprt
Col12a1
Mobp
Esr1
Nell2
Pvrl3
C1ql2
Camk2d
Lonrf2
Tm4sf1
Kcnip4
P2ry1
Snca
1700003F12Rik
Ghrh
Ndnf
Tnr
mt-Nd6
Cul9
Actb
Trpc5
Htr5b
Foxp1
Gucy1a3
Tmem132c
Wscd1
Pla2g16
Gm26551
Tmem178
Gm42590
Tmem176a
Cdh8
Rgs6
Trpc4
Arpc1b
Thsd7b
Ctsh
Gm21917
Ccnd2
Ldb2
Xaf1
Galnt18
Nrip3
Npy
Nrcam
Cyba
Plpp4
Klhl13
Hacd4
Rbms1
Sorcs1
Rbms3
Dlgap1
Proser2
Adgrf5
Gapdh
Brinp3
Mbp
Adamtsl1
Unc5d
Sv2c
Dcbld2
Abca8a
Sepw1
Pmepa1
Clec2d
Tmem158
Ccnb1ip1
Edil3
Slc14a1
Rnase4
BC039966
Adgrg6
Ckb
Cpne8
Gng8
Gm38134
Il1r1
Pbx1
Col6a4
Hes1
Vwc2
Gstp1
Col4a4
Gm29771
Phactr1
Hs3st2
B2m
Tenm2
Rps6ka3
Mmp17
Otp
Id3
Adamts1
Tmem108
Cpne7
Ntn1
Sema6d
Iqgap2
Phkg1
Ngb
St8sia6
Slc24a2
Cgnl1
Zfp607
Serpinf1
Hmcn1
Pcdhb7
Pitpnc1
Rec114
Sulf2
Fat3
Fastkd1
Col5a2
Lsamp
Sdk1
Pcdhb9
Fgf18
Rab3c
Meis2
Gfra2
Crim1
Paip2b
Gadd45g
Crip2
Anks1b
Acvrl1
Pcdh9
Tcfl5
Nms
Igsf1
Spin2c
Aldh1a3
Gabre
Scn7a
Ncam2
Tgfb1
Btbd3
Nyap2
Barx2
Slc11a1
Cpne6
Nwd2
Pcgf2
Kdr
Ephb1
3110009E18Rik
Zfp287
Ramp1
Palmd
Irx3
Adamtsl5
Gpr157
Nudcd2
4930548H24Rik
Nol9
Pantr1
Kcnh8
Mettl7a3
Nefh
Bcat1
Nos1ap
Mafb
Zfp36
Plcb1
Reln
Foxa1
Anxa5
Gm13075
Fosb
Ankrd2
Ddah1
Prkca
Cela1
Nrp1
Mt2
Nostrin
Ccl2
Opcml
Clic4
S100a13
Cbln1
Slc1a3
Trhr
Khdrbs2
Jund
Cdkn1a
Clrn1
Dkkl1
Fstl1
Gnb4
Pde4b
Vamp8
Endov
Cacna1e
Ndst4
Adarb2
Gngt2
Pcdh8
Hist1h1c
Pbx3
Egflam
Lmo4
Pde3a
Tinagl1
Pde5a
Foxf2
Fam84a
Cntnap5a
Susd1
Ptprz1
Cda
Oxtr
Gm2694
Gm42418
Arhgap15
Hspa12a
Sox14
Rab11fip4
Car10
Psd3
Ptprb
Abcb1a
Hsf2bp
Psmb5
Pla2g7
Slc24a3
Rgs4
Pdzk1ip1
Klhl1
Thrsp
Id1
Prokr2
Ptgds
Efna5
Pde2a
Plk4
Frmpd4
Atp1a2
Zfp536
Spock1
P2rx4
Plch1
Fosl2
Pcsk1
Krtap28-13
Strip2
Dgkk
Srgn
S100a10
Pla2g2d
Tnfrsf12a
Nes
Atp2b4
Fras1
Cd302
Vav1
Tiparp
Tacr1
Lhx1os
Clca3a2
Zfp804a
Gm15124
Timp3
Diras2
Nxn
Carf
Rnh1
Ttr
Tubb2a
Pglyrp1
H2-Q10
Gpc3
Fndc9
Crhbp
Atpaf2
Crnde
Vat1l
RP23-231J2.1
Nr4a3
Prune2
Gna15
Etv1
Slc22a3
Rhou
Plxdc2
Scx
Kcnc4
Tie1
Lgals9
RP23-394F19.1
Cd9
Slc6a17
Crlf1
Itgb5
Cfap52
Cntnap2
Syt6
Pdgfd
Robo2
Unc13c
Plxna2
PISD
Nr4a1
Tmem163
Mrap2
Chodl
Cachd1
Tmtc1
Etl4
Ripply3
Syt4
Ldha
Kctd4
Cadps2
Htr1b
Pcdhb13
Gmcl1
Mgat4c
Sall1
1700001L19Rik
Fcgr3
Sez6
Inadl
Bvht
Pfn1
Cck
Rhbdl2
Efhd2
Fhad1
Xlr4a
Pdzrn4
Sec24a
Smim1
Fabp3
Procr
Slc5a5
Rps6ka6
B3galt1
Sema3a
Fign
Fut9
Enpep
Ncbp3
Adamts2
Rps6ka2
Cxcl13
Gstm1
Rmi2
Pde10a
Gch1
Gm37083
Avpi1
Pcdhb22
Gpc6
Gm26563
Pcsk1n
Klc3
Cthrc1
Eif2s3y
Crem
Selm
Tnnt2
Gfod2
Scn1a
Bex4
Prdx2
Gm26604
Il4
Prdx1
Kcnq1ot1
Atp5b
Irf8
Avil
Lhx5
Zeb2os
Runx1t1
Mkrn3
Gm26730
Cited2
Rnf183
Tuba1a
Greb1
Kank4
Cd53
Slc6a13
Sox2
Herc3
Ptgfr
Ucp2
Btg2
Nol4l
Tcf7l2
Clcn5
E530001K10Rik
Chrna4
Vcan
Fn1
Nmur2
Aff2
Foxp2
Ptn
Cdh5
Ccdc85b
Gria1
Gnai1
Gadd45a
Nov
Cyr61
Pvrl1
Shisa9
Cxcl10
2010300C02Rik
Mgat5
Npas3
A230083N12Rik
Vill
Hpcal1
Mgst3
Selplg
Spsb1
Zdbf2
Pou3f3
Tmem35
Ankrd1
Scd1
Tenm1
Grik3
Mn1
Cadm1
Frmpd3
Sag
Cntn4
Hspa1b
Prss23
Ccl4
Clic5
Esm1
Tesc
Stmn1
Satb2
Efr3b
Marf1
Gbe1
Slco2b1
Kitl
Fxyd2
1700080N15Rik
Chst2
Sdk2
Id4
Syt7
Psmc5
Pdgfrb
S100a1
Ceacam10
Tnfrsf13c
Bmx
Lgi2
Tox
Popdc3
Slc6a4
Ntrk1
Ldhb
Irx5
Epha3
Kndc1
Ryr2
Celf2
S1pr1
Kirrel3os
Nxph3
Sorl1
Mcoln2
Fndc5
mt-Atp8
Sez6l
1110015O18Rik
Arhgdig
Dpp10
Vldlr
Fam19a1
Exoc4
Pak3
Gm37305
Renbp
Psmb3
Lamc3
Tmem215
Htr1a
Acvr1c
Tspo2
Rtn4rl1
Myrip
Ndrg2
Atf3
Casp1
Olah
2410022M11Rik
Axl
Slc22a8
Atp13a5
Galnt15
Ifitm1
Hpgd
1810011O10Rik
Slco2a1
Rnd3
Nexn
Wbscr17
Pgam2
Lgals7
Brinp1
Il1rapl2
Slc38a3
En2
Wfdc1
Elavl2
Cryba2
Tagln2
Kif21a
Ptchd1
Ptger3
Kcnh5
Ebf3
Car5b
Irs4
Gng12
Ccdc109b
Psmb6
Ahnak
Brs3
Gm15627
Siglech
Vstm2b
Slc4a4
Zfhx4
Tanc1
Lypd6b
Tspan17
Ddah2
Glra1
Dctn3
Fbxl18
Chst1
Apoe
Wnt16
Kcnc2
Sgcz
Vsir
Gpr149
Ccnd1
Clstn2
Tekt1
Man1a
Tmsb10
Gm27199
Olfm3
Fam181b
Vstm2a
Elmod1
Cmtm8
Cacng3
Ptpn18
Grm7
Armcx2
Gm4779
Ucn
Hrh1
Pmp22
Sertm1
Adgrg2
Hrh3
Aif1
Mustn1
Areg
Zfhx3
Npb
Tenm4
Kl
Ndfip1
Syt17
Mt3
Card19
1700037H04Rik
Cntn1
Neto1
Ifitm3
H2-DMb1
Nhlh2
1190002N15Rik
Cdc14a
Lynx1
Il5ra
Prss29
Defb42
Ticrr
Ltbp2
Cd300lg
Lypd6
Lef1
C130074G19Rik
Gm6619
Atp1b3
Fam163a
Prdm16
Scn4b
Thsd7a
Abca12
Slc7a8
Lin7a
Rph3a
Krt28
Slc35f4
Prpf18
Lima1
Atp2b1
Glyat
Cndp1
Ajap1
Gpr35
Nkx2-2
Ubash3b
Rasgrp3
Pcdhb8
Mical2
Arhgap6
Fryl
Fxyd7
Cep57l1
Dpy19l1
Lrat
Tmem232
Grm8
Gm21887
Kcnc1
Psma2
Gas7
Pola1
Cntn3
Pkib
Adamts5
Lgr5
Nmb
Gm14419
Dusp1
Il11
Serpina3n
Gabbr2
Gabra2
Pcsk2
Neu4
Rac2
Bmp7
Tnfaip8l2
Blnk
Des
Piezo1
Hck
Icam1
Atp6ap1l
Gm10687
Fhl3
Tecr
Ifitm2
Kcnb2
Acadl
Hunk
Hey1
Sipa1l2
Npy1r
Egfl7
H2-T23
Cyyr1
Col14a1
D930028M14Rik
Bend5
Pgp
Sstr2
Ifi35
Rcsd1
Fgfr1
4930426D05Rik
Tnfrsf10b
Rgs7bp
Msi2
Syt10
Trp53i11
Sema3d
Dnm3
Lrrn1
Htra1
Spint2
Cabp7
Hspb8
Lhfpl5
Tox2
Rcan2
P2ry12
Dzip1l
Ankrd34b
Vamp5
Nr3c1
Cav1
Myh2
5930412G12Rik
Brinp2
Pla2g4d
Fibin
Tslp
Limk2
Col8a1
Kcnf1
Arhgdib
Nr2f1
Camkv
Il10ra
Enho
Ppia
A330050F15Rik
Zfos1
2900055J20Rik
Cacng4
Pcdhb14
Hkdc1
Pla2r1
Hapln1
Slc25a31
Gm2670
Ppfia2
Atp1b2
Mal2
Htr7
Crlf2
Epha6
Kirrel3
Robo1
Tpst1
Arpc1a
Gm43278
2810417H13Rik
Slbp
Mdh1
Zfhx2
Fcer1g
Megf11
Krtap17-1
Sox1
Iqsec3
Ntrk3
Slc44a5
Gpr22
Mme
Flrt2
Cygb
Pea15a
Oprk1
Gm13267
Amotl1
Fli1
Slc10a4
Tpd52l1
Fam89a
Cnn3
Raph1
Sdc4
Ildr2
Dlg2
Rec8
B3galt2
Ar
Il33
Samd4
Serpina12
AW112010
Armcx6
Eps8
Nt5c
Scn9a
Ano3
Anxa2
Nova1
Ppef1
Klhdc8a
Sv2b
Wdr34
Plxnd1
Bhlhe41
Layn
Ptpre
Col4a1
Rnf152
1810041L15Rik
Slc12a7
Pclo
Pepd
Fam20a
Gm17501
Slc35e3
Cfh
Hcls1
Grpr
Lmo7
Rexo2
Kcna2
Gchfr
1700025G04Rik
Bag3
Prex2
Hip1r
Nol3
Syp
Sema3b
Rnf150
Lrpap1
Dpp4
Brip1
Snx7
Ube2e3
Ank
Sh3bgrl3
9530059O14Rik
Gstm7
Pcdh18
Ppargc1a
Ppa2
Rrad
Atf5
Kcnk2
Igf1r
Ppp1r1a
Gm17750
Ccdc141
Cckbr
Slc28a3
Myh11
Rdh16
Gm4208
Pde1b
Omg
Htr1d
N4bp2l1
Rapgef4
Ngfr
Parvg
Gm26782
Serpinb6b
Tmem243
Pex5l
Emc9
Galnt13
Ccdc146
Pcsk5
Napb
Lmo2
Enc1
mt-Nd4l
Aes
Tenm3
H2-K1
Gnb1
Shb
Gm9962
Hspa12b
Trf
Plpp3
Pld5
Klf6
Tmem132b
Ubl3
Kcnj5
A2m
Tle4
Tnfrsf11b
Plcl1
Tgfb2
Tppp3
St6galnac5
Lingo2
Rgs7
Emcn
Cdh22
Cnksr2
Sowahc
Lrp1b
Tcerg1l
Arhgap24
Map4k4
Nhsl2
Rab11fip1
Plcxd2
Myl6
Col6a1
Sox7
Ier2
Zfp385b
Cckar
Glra2
Gstm5
Cd1d1
St8sia4
Pls3
Lonrf3
Olfm1
Klf4
Kcns3
Vamp2
Fam81a
Adamtsl2
Ramp2
Ggct
Plvap
Nkx6-3
Gata2
Rasd2
1700020I14Rik
Adam28
Steap2
Itm2b
Oas1e
Ngef
Isg20
Tram1l1
Hexb
Hepacam2
Stk32a
Rph3al
Apobec2
Serinc5
Pecam1
Fat1
Dab2
Cebpa
Gm7298
Pde8a
Tmem119
Fhod3
Amz1
Cdk17
Adra1b
Fgf10
Cdh7
Khdrbs3
1700031P21Rik
Camk4
Nhs
Vcam1
Adap2
Klk8
Igsf6
Ajuba
Epcam
Neurod1
Htra3
Wisp1
Sds
Emx2
Ppl
Uchl1
Mmel1
Nudt5
Pigt
Ppp1r14c
Ctxn1
Gja1
Ina
Nanos1
Gm12371
Rpp25
Cobll1
Aqp5
Cp
Baiap2l2
Kcnab3
Ptprm
Rgs8
Scn8a
Bhlhe22
Sdc2
Chrna3
Slc18a2
Ext1
Dach1
Armcx3
Stk32c
Sstr1
Tecta
1500009L16Rik
Scn1b
Vipr2
Wdr86
Plce1
Gt(ROSA)26Sor
Nlgn1
Tns1
Tmem160
Uncx
Sorcs3
Trpc3
C1qb
2900060B14Rik
Cntnap4
Grip1
Lbh
Gria4
Rasgrp2
Slc7a1
Gpld1
Csf1r
B4galt6
Dab1
Mpeg1
Kcnj8
8430408G22Rik
Cbfa2t3
Cdk14
3110035E14Rik
Bean1
Cd74
Asic2
G0s2
Il1b
Cald1
Mfge8
Kazn
Manea
Gas1
Upb1
Tmbim4
Il11ra1
Lgi3
Arl6ip5
Agtr1a
Arhgap20
Lrrc2
Fam63b
Gstm6
Btg3
Hopx
Plxnc1
Cib1
Rnf207
Hdc
Mir124-2hg
4930447C04Rik
Specc1
Slc6a19
Trim36
Zfp503
Lix1
Hpca
Foxq1
A730046J19Rik
Pkp4
Trhde
Kcna1
Dad1
Blvrb
Esr2
Nrarp
Dctn4
Nid1
Rbm47
Vat1
Tnfsf12
Aco2
Cacna1i
Tubb2b
Krt18
Arhgef3
Csmd1
Pstpip1
Fam212a
Iqcj
Tchh
Tfpi
Gm43154
Caly
Auts2
Tmem50b
1700012B09Rik
Psma6
Phactr2
Reps2
Adra2a
Vsx2
Ckap2l
Cox6a2
Mum1l1
Slc25a5
Trnp1
Tnfaip8
Nckap1l
Cpn1
Medag
Pfkfb3
Socs2
Magi3
Ephx1
Srrm4
Kcnj12
Maoa
Bend7
Slc16a4
Rhox5
Eps8l2
Cebpb
Cbx3
Prkg2
Fam184a
Dach2
Ldoc1
Epha7
Fam101b
Asap2
Begain
Efnb2
Hbegf
Ube2m
Ptprd
Olig2
Ddx4
Crybb1
Spryd7
Abat
Rhoc
Ube2ql1
Bok
Nudt4
Akap12
Gm9866
Fxyd5
Gng4
Iqcg
Bmpr2
Arhgef16
Tgfbr2
Aip
Ociad2
Psma5
Akap13
Auh
Klhl14
Rap1gap2
Enox2
Arhgap31
Gm2464
Hist3h2ba
Ncald
Cox7b2
Thbs1
Amn
Igsf3
Irf6
Dll1
Cidea
Dhcr24
Phf24
Dmd
Gng2
Negr1
Aard
Cav2
Ass1
Ccdc74a
Stap2
Apba2
Aldh1a2
Kcnh7
Rgs16
Pcdh20
Mien1
Stab1
Cd34
Zfp804b
Prorsd1
Pax2
Wwc1
Hs6st2
Tgfa
Lair1
Rasl10a
Nav2
Tle3
Cyp2b23
RP23-449M8.5
Ndrg4
Glo1
Mfap5
Gorasp2
Clec1b
mt-Nd1
Tnfrsf8
Rtbdn
Qpct
Pdgfra
Matn1
C530050E15Rik
Dspp
Piezo2
Prkcd
Mdh2
Cdh18
Rora
Ppp1r11
Gm13629
Rps28
Sema3f
Rab6b
Cdk18
Ak9
Slc18a3
4930523C07Rik
Pear1
Fbln5
Marc1
Robo4
Epsti1
Hvcn1
Tigd4
Sp9
Slc6a12
Zfp750
Krt26
E030018B13Rik
Chad
Spaca1
C530008M17Rik
Tmsb4x
Gm44096
1110008P14Rik
Pitpnm3
Pcdhb18
Nrtn
Neat1
Stac2
Rab26os
Dsel
Rtl1
Ascl1
Foxn3
Acta1
Fkbp1b
Fam132a
Pcdhb6
Slc40a1
3222401L13Rik
Lhfp
Gm2000
Gm3764
Gpr176
Setd7
Hpcal4
Spats2l
Adh5
AF529169
Synj1
Nucb2
Ablim1
Rims1
Ptger4
Carhsp1
Pcdhb17
Car8
Chst5
Rorc
As3mt
Homer2
Zdhhc2
Mpped1
Map2k1
B3gat2
Gdpd2
Acot1
Sox21
Cacna1f
Gabra5
Atp5k
Rpap3
A330008L17Rik
Col4a3
Kcnn3
H2-M3
Kdm5d
Cdh4
Gbf1
Rabac1
Usp51
Parva
Efnb3
Hsph1
Il18
RP24-267C3.3
Cope
Ocln
Ank1
Puf60
Dock8
Dock9
Jph3
Atp8a1
AI593442
Lrrtm4
Plppr5
Glra3
Nrsn1
Stk32b
Srpx2
Rimbp2
Bola2
Apol9b
Myl12b
Gm826
Ubc
Rplp0
Gm12758
Hmgb3
Hs3st3a1
Polr2l
Tbc1d4
Gm5868
Wnt7b
Col4a2
Bcas1
Elfn1
Gna14
Wdfy4
Gm14295
Ak5
Ttf1
Dnah7b
Igfbp4
Tctn1
Rnf128
Oprm1
Sult2b1
Spink10
4930579F01Rik
Zc3h12d
Mex3b
Mxra7
Pgd
Fkbp9
Ptprk
St3gal5
Cacng7
Zfp462
Terf2ip
Smim13
Vip
Gm15396
Plppr1
Lhfpl2
Cast
Akr1b3
Rprml
Rab11a
Vamp1
Tmcc3
Stmn4
Tspan13
Hoga1
Ankrd6
Stard4
4833422C13Rik
Pcnx
Klf5
Lrrc4c
Nr4a2
Sh3bp4
2010107E04Rik
Ryr3
Scamp1
Gm5148
Hs3st6
Pttg1
Ndst3
Nacc2
Nxnl2
Galntl6
Cox7a1
Fam213b
Kcnip1
Luzp1
Dbp
Tmem72
Cacna2d1
Snhg18
Mvp
Plk5
Ccr5
Gm8251
Gm26761
Cd93
Slc35d3
RP23-240M8.2
Ccnjl
9330179D12Rik
Cd2
Sebox
Cnga1
Sh3kbp1
Gm26802
Sox4
Tpi1
Fzd1
Cntn5
Fam174b
Lats2
Acly
Ctsd
Uty
Arpc3
Etfb
Rapgef5
Cdh11
AI413582
Kirrel
Kcnj4
Klhl29
Kcns1
Pfdn6
Hmgcs1
Rwdd2a
Nkain3
Sh3bp5
Glul
Pou2f2
Kbtbd12
Mospd2
Pla2g3
Nnmt
1810058I24Rik
1700007B14Rik
Gm37751
Gata3
Tmem150c
Ccdc108
Cuedc2
Them6
Tubb6
Olfml3
Grb14
Rap1gds1
Chek2
Cdh10
Tifa
Arid5a
Sox5
Sapcd1
Dnajc12
Tacstd2
Pth2r
Slco3a1
Spdef
Lcorl
9330182L06Rik
Zmat4
Kcng4
Rab26
Syne3
Ooep
Cdkl2
Slc36a1
Dner
Apoc3
Igfbpl1
Ppa1
Sh2d1a
Nckap5
Plcg2
Pde1c
Asns
Actr2
Pbld2
Hspa4l
Golm1
Otof
Ier5
Stac
Faim2
Nkx6-2
Steap1
Gm10287
Klf7
Fabp5
Acta2
Cd52
Wnt7a
Heyl
Lacc1
D16Ertd472e
Zbbx
Lama4
Car5a
Cd180
Siglecf
Crybb2
Rhbg
Esyt3
Samsn1
Bhlha15
Gm42500
Prss37
Gm13530
3632451O06Rik
Tyrobp
Csgalnact1
Syn2
Nfia
Scd2
Thsd4
Tshz1
2610305D13Rik
Sulf1
Dbi
Npy4r
Stc1
Shisa6
Gm10451
Gsg1l
Alox8
Cntnap3
Tnik
Slc1a1
Scn3b
Ctss
Wbscr27
Chrm1
Srxn1
Vps8
Gnal
Prkg1
Ror2
Hmgn5
Nebl
Col6a3
BC089491
Wbp5
Palm2
Gabrb1
Hsp90aa1
Ankrd29
Tmem200a
Pcdhb5
9330158H04Rik
Ptgdr
Snx10
Enpp2
Egfr
Nabp1
Bmp2
Ak4
Myh14
Shtn1
Cox7b
Fgf11
Jsrp1
Adcy1
Kif26b
Patl2
[truncated: 1 more rows]
